# Supplementary material for: Brief mindfulness-based intervention of ‘STOP (Stop, Take a Breath, Observe, Proceed) touching your face’: a study protocol of a randomised controlled trial
Source: PubMed Central journal article supplement — BMJ Open. 2020 Nov 24;10(11):e041364. doi: 10.1136/bmjopen-2020-041364 (PMC7689065; doi:10.1136/bmjopen-2020-041364), 2020-11-24
Supplement: bmjopen-2020-041364.draft_revisions.pdf [file bmjopen-2020-041364.draft_revisions.pdf]

# BMJ Open

BMJ Open is committed to open peer review. As part of this commitment we make the peer review history of every article we publish publicly available.

When an article is published we post the peer reviewers' comments and the authors' responses online. We also post the versions of the paper that were used during peer review. These are the versions that the peer review comments apply to.

The versions of the paper that follow are the versions that were submitted during the peer review process. They are not the versions of record or the final published versions. They should not be cited or distributed as the published version of this manuscript.

BMJ Open is an open access journal and the full, final, typeset and author-corrected version of record of the manuscript is available on our site with no access controls, subscription charges or pay-per-view fees (<http://bmjopen.bmj.com>).

If you have any questions on BMJ Open's open peer review process please email [info.bmjopen@bmj.com](mailto:info.bmjopen@bmj.com)

# BMJ Open

## A brief mindfulness-based intervention of "STOP (Stop, Take a Breath, Observe, Proceed) touching your face": a study protocol of a randomized controlled trial

|                               |                                                                                                                                                                                                                                                                                                                                                                                                                                                                                                                                                                                                                                                                                                                                                                                                                                                                                                                                                                                                                                                                                                                                                                                                                                                                                                                                                                                                                                                                                                                                                                                                                                                                                                                                                                                                                                                                                                                                                                                                  |
|-------------------------------|--------------------------------------------------------------------------------------------------------------------------------------------------------------------------------------------------------------------------------------------------------------------------------------------------------------------------------------------------------------------------------------------------------------------------------------------------------------------------------------------------------------------------------------------------------------------------------------------------------------------------------------------------------------------------------------------------------------------------------------------------------------------------------------------------------------------------------------------------------------------------------------------------------------------------------------------------------------------------------------------------------------------------------------------------------------------------------------------------------------------------------------------------------------------------------------------------------------------------------------------------------------------------------------------------------------------------------------------------------------------------------------------------------------------------------------------------------------------------------------------------------------------------------------------------------------------------------------------------------------------------------------------------------------------------------------------------------------------------------------------------------------------------------------------------------------------------------------------------------------------------------------------------------------------------------------------------------------------------------------------------|
| Journal:                      | <i>BMJ Open</i>                                                                                                                                                                                                                                                                                                                                                                                                                                                                                                                                                                                                                                                                                                                                                                                                                                                                                                                                                                                                                                                                                                                                                                                                                                                                                                                                                                                                                                                                                                                                                                                                                                                                                                                                                                                                                                                                                                                                                                                  |
| Manuscript ID                 | bmjopen-2020-041364                                                                                                                                                                                                                                                                                                                                                                                                                                                                                                                                                                                                                                                                                                                                                                                                                                                                                                                                                                                                                                                                                                                                                                                                                                                                                                                                                                                                                                                                                                                                                                                                                                                                                                                                                                                                                                                                                                                                                                              |
| Article Type:                 | Protocol                                                                                                                                                                                                                                                                                                                                                                                                                                                                                                                                                                                                                                                                                                                                                                                                                                                                                                                                                                                                                                                                                                                                                                                                                                                                                                                                                                                                                                                                                                                                                                                                                                                                                                                                                                                                                                                                                                                                                                                         |
| Date Submitted by the Author: | 05-Jun-2020                                                                                                                                                                                                                                                                                                                                                                                                                                                                                                                                                                                                                                                                                                                                                                                                                                                                                                                                                                                                                                                                                                                                                                                                                                                                                                                                                                                                                                                                                                                                                                                                                                                                                                                                                                                                                                                                                                                                                                                      |
| Complete List of Authors:     | <p>Liao, Yanhui; Zhejiang University School of Medicine Sir Run Run Shaw Hospital, Department of Psychiatry ; Key Laboratory of Medical Neurobiology of Zhejiang Province,<br/> Wang, Ling ; Florence Nightingale Faculty of Nursing, Midwifery &amp; Palliative Care,<br/> Luo, Tao ; Department of Social Medicine and Health Management, Xiangya School of Public Health, Central South University; Jiangxi Mental Hospital<br/> Wu, Shiyou ; The Third Affiliated Hospital of Guizhou Medical University<br/> Wu, Zhenzhen; Department of Psychiatry, the Second Xiangya Hospital, Central South University; National Clinical Research Center on Mental Disorders<br/> Chen, Jianhua ; Shanghai Clinical Research Center for Mental Health, Shanghai Key Laboratory of Psychotic Disorders, Shanghai Mental Health Center, Shanghai Jiao Tong University School of Medicine<br/> Pan, Chen ; Department of Clinical Psychology, the Third Xiangya Hospital, Central South University<br/> Wang, Yunfei; Department of Psychiatry, the Second Xiangya Hospital, Central South University; National Clinical Research Center on Mental Disorders<br/> Liu, Yueheng ; Department of Psychiatry, the Second Xiangya Hospital, Central South University; National Clinical Research Center on Mental Disorders<br/> Luo, Qinghua ; The first affiliated hospital of Chongqing Medical University<br/> Guo, Xin ; Psychiatry department, Renmin Hospital of Wuhan University<br/> Xie, Liqin; Changsha Social Work College<br/> Zhou, Jun ; Changsha Social Work College<br/> Chen, Wei ; Zhejiang University School of Medicine Sir Run Run Shaw Hospital, Department of Psychiatry, the Second Xiangya Hospital, Central South University; 2. Key Laboratory of Medical Neurobiology of Zhejiang Province,<br/> Tang, Jinsong; Zhejiang University School of Medicine Sir Run Run Shaw Hospital, Department of Psychiatry ; 2. Key Laboratory of Medical Neurobiology of Zhejiang Province,</p> |
| Keywords:                     | EDUCATION & TRAINING (see Medical Education & Training), MENTAL HEALTH, PUBLIC HEALTH                                                                                                                                                                                                                                                                                                                                                                                                                                                                                                                                                                                                                                                                                                                                                                                                                                                                                                                                                                                                                                                                                                                                                                                                                                                                                                                                                                                                                                                                                                                                                                                                                                                                                                                                                                                                                                                                                                            |

1  
2  
3  
4  
5  
6  
7  
8  
9  
10  
11  
12  
13  
14  
15  
16  
17  
18  
19  
20  
21  
22  
23  
24  
25  
26  
27  
28  
29  
30  
31  
32  
33  
34  
35  
36  
37  
38  
39  
40  
41  
42  
43  
44  
45  
46  
47  
48  
49  
50  
51  
52  
53  
54  
55  
56  
57  
58  
59  
60

|                                                                                                                                                         |
|---------------------------------------------------------------------------------------------------------------------------------------------------------|
|                                                                                                                                                         |
| Note: The following files were submitted by the author for peer review, but cannot be converted to PDF. You must view these files (e.g. movies) online. |
| STOP practice.mp3                                                                                                                                       |

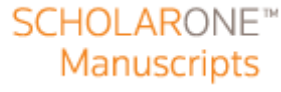

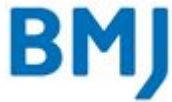

I, the Submitting Author has the right to grant and does grant on behalf of all authors of the Work (as defined in the below author licence), an exclusive licence and/or a non-exclusive licence for contributions from authors who are: i) UK Crown employees; ii) where BMJ has agreed a CC-BY licence shall apply, and/or iii) in accordance with the terms applicable for US Federal Government officers or employees acting as part of their official duties; on a worldwide, perpetual, irrevocable, royalty-free basis to BMJ Publishing Group Ltd ("BMJ") its licensees and where the relevant Journal is co-owned by BMJ to the co-owners of the Journal, to publish the Work in this journal and any other BMJ products and to exploit all rights, as set out in our [licence](#).

The Submitting Author accepts and understands that any supply made under these terms is made by BMJ to the Submitting Author unless you are acting as an employee on behalf of your employer or a postgraduate student of an affiliated institution which is paying any applicable article publishing charge ("APC") for Open Access articles. Where the Submitting Author wishes to make the Work available on an Open Access basis (and intends to pay the relevant APC), the terms of reuse of such Open Access shall be governed by a Creative Commons licence – details of these licences and which [Creative Commons](#) licence will apply to this Work are set out in our licence referred to above.

Other than as permitted in any relevant BMJ Author's Self Archiving Policies, I confirm this Work has not been accepted for publication elsewhere, is not being considered for publication elsewhere and does not duplicate material already published. I confirm all authors consent to publication of this Work and authorise the granting of this licence.

1  
2  
3  
4 1 **A brief mindfulness-based intervention of “STOP (Stop, Take a Breath,**  
5  
6  
7 2 **Observe, Proceed) touching your face”:** a study protocol of a  
8  
9  
10 3 **randomized controlled trial**  
11  
12  
13 4  
14

15 5 Yanhui Liao<sup>1,2,3\*</sup>; Ling Wang<sup>4</sup>; Tao Luo<sup>5,6</sup>; Shiyu Wu<sup>7</sup>; Zhenzhen Wu<sup>8,9</sup>; Jianhua Chen<sup>10</sup>; Chen  
16  
17 6 Pan<sup>11</sup>; Yunfen Wang<sup>8,9</sup>; Yueheng Liu<sup>8,9</sup>; Qinghua Luo<sup>12</sup>; Xin Guo<sup>13</sup>; Liqin Xie<sup>14</sup>; Jun Zhou<sup>14</sup>; Wei  
18  
19  
20 7 Chen<sup>1,2</sup>; Jinsong Tang<sup>1,2</sup>  
21

- 22  
23 8 1. Department of Psychiatry, Sir Run Run Shaw Hospital, School of Medicine, Zhejiang University,  
24  
25 9 Hangzhou, China  
26  
27 10 2. Key Laboratory of Medical Neurobiology of Zhejiang Province, Hangzhou, China  
28  
29  
30 11 3. Addictions Department, Institute of Psychiatry, Psychology and Neuroscience, King's College  
31  
32 12 London, London, UK  
33  
34  
35 13 4. Florence Nightingale Faculty of Nursing, Midwifery & Palliative Care, King's College London,  
36  
37 14 London, UK  
38  
39  
40 15 5. Department of Social Medicine and Health Management, Xiangya School of Public Health,  
41  
42 16 Central South University, Changsha, China  
43  
44  
45 17 6. Jiangxi Mental Hospital, Nanchang, China  
46  
47 18 7. The Third Affiliated Hospital of Guizhou Medical University, Qiannan, China  
48  
49  
50 19 8. Department of Psychiatry, the Second Xiangya Hospital, Central South University, Changsha,  
51  
52 20 China  
53  
54  
55 21 9. National Clinical Research Center on Mental Disorders, Changsha, China  
56  
57  
58  
59  
60

- 1  
2  
3 22 10. Shanghai Clinical Research Center for Mental Health, Shanghai Key Laboratory of Psychotic  
4  
5  
6 23 Disorders, Shanghai Mental Health Center, Shanghai Jiao Tong University School of Medicine,  
7  
8 24 Shanghai, China  
9  
10  
11 25 11. Department of Clinical Psychology, the Third Xiangya Hospital, Central South University,  
12  
13 26 Changsha, China  
14  
15 27 12. The first affiliated hospital of Chongqing Medical University, Chongqing, China  
16  
17  
18 28 13. Psychiatry department, Renmin Hospital of Wuhan University, Wuhan, China  
19  
20  
21 29 14. Changsha Social Work College, Changsha, China  
22  
23 30 \*Corresponding Author: Yanhui Liao, 3 East Qingchun Road, Hangzhou, Zhejiang, P. R. China  
24  
25 31 (310016). E-mail: [liaoyanhui@zju.edu.cn](mailto:liaoyanhui@zju.edu.cn)  
26  
27  
28  
29  
30  
31  
32  
33  
34  
35  
36  
37  
38  
39  
40  
41  
42  
43  
44  
45  
46  
47  
48  
49  
50  
51  
52  
53  
54  
55  
56  
57  
58  
59  
60

## 32 **Abstract**

33 **Introduction** Face-touching behavior often happens frequently and automatically, and poses  
34 potential risk for spreading infectious disease. Mindfulness-based interventions (MBIs) have  
35 shown its efficacy in the treatment of behavior disorders. This study aims to evaluate an online  
36 mindfulness-based brief intervention skill named “STOP (Stop, Take a Breath, Observe, Proceed)  
37 touching your face” in reducing face-touching behavior.

38 **Methods and analysis** This will be a single-blind, randomized, controlled, trial. We will recruit  
39 1,000 participants, and will randomize and allocate participants 1:1 to the “STOP touching your  
40 face” intervention group (n=500) and the control group (n=500). All participants will be asked to  
41 monitor and record their face-touching behavior. The intervention group will receive the brief  
42 online mindfulness-based “STOP touching your face” program, and the control group will receive  
43 control intervention. Primary outcome will be the efficacy of short-term mindfulness-based  
44 “STOP touching your face” intervention for reducing the frequency of face-touching. The  
45 secondary outcomes will be the reduction of the duration of face-touching after intervention;  
46 the correlation between the psychological traits of mindfulness and face-touching behavior; and  
47 the differences of face-touching behavior between left-handers and right-handers. We will  
48 recruit 1000 participants from April to June 2020 or until the recruitment process is complete.  
49 The follow-up will be completed in June 2020. We expect all trial results to be available by the  
50 end of June 2020.

51 **Ethics and dissemination** The study protocol has been approved by The Ethics Committee of Sir  
52 Run Run Shaw hospital, an affiliate of Zhejiang University, Medical College (NO. 20200401-32).  
53 Study results will be disseminated via social media and peer-reviewed publications.

1  
2  
3 54 **Trial registration number** NCT04330352.  
4  
5

6 55

7  
8 56 **Strengths and limitations of this study**  
9

10 57 • This is the first RCT to evaluate the efficacy of brief mindfulness intervention to reduce face-  
11  
12 touching behavior.  
13 58

14  
15 59 • This is a theoretical framework guided (mindfulness-based cognitive behavior theory) large  
16  
17 sample size RCT to evaluate the efficacy of “STOP touching your face” during the outbreak of  
18 60  
19 COVID-19.  
20 61

21  
22  
23 62 • “STOP touching your face” program is a free, brief, simple and widely accessible mindfulness-  
24  
25 based behavior change intervention.  
26 63

27  
28 64 • There is no digital videotape recording for the behavior of face-touching by researchers.  
29  
30 Alternatively, it will be self-monitored.  
31 65

32  
33 66 • This is only a brief intervention by internet. A face to face long-term mindfulness intervention  
34  
35 will help participants gain the maximum benefits of practice.  
36 67  
37  
38  
39  
40  
41  
42  
43  
44  
45  
46  
47  
48  
49  
50  
51  
52  
53  
54  
55  
56  
57  
58  
59  
60



## 69 Introduction

70 Nonverbal behavior plays an important role in interpersonal relations and constitutes a large  
71 amount of all communication. But self-touching is usually not used to communicate with others  
72 and is often done automatically without thinking about it at all in our daily life<sup>1</sup>. It might be one  
73 of the so called "autistic" gestures when they have no evident meaning<sup>2</sup>. Spontaneous facial self-  
74 touching or face-touching has been defined as *the use of the hand to touch the individual's own*  
75 *face* to scratch, rub, groom, or caress it. Research shows that the average face-touching  
76 frequency ranges from approximately 16<sup>3</sup> to 23<sup>4</sup> times per hour. Furthermore, research of face-  
77 touching across handedness showed that left-handed individuals more frequently touch their  
78 face than their counterparts<sup>5</sup>.

79  
80 An increase in face-touching frequency may result in increased risk of transmissible infections,  
81 defined as self-inoculation or auto-inoculation (a type of contact transmission occurs when a  
82 person transfers an infectious disease from one part of the body to another, e.g., when a  
83 contaminated hand makes subsequent contact with the nose and introduces contaminated  
84 material to those areas)<sup>3 4</sup>. Of all face-touching behaviors, touching the T-zones will pose a  
85 potential risk for transmission and acquisition of a range of infectious diseases. Unfortunately,  
86 research found that 42.2%<sup>6</sup> to 44%<sup>4</sup> of face-touching involved in contacting with a mucous  
87 membrane. Even clinicians touch their T-zones (the mucus membranes of the eyes, nose, and  
88 mouth) as frequently as 19 times on average within 2 hours<sup>7</sup>. Many diseases can be spread  
89 by self-inoculation in this way, including coronavirus disease 2019 ("COVID-19")<sup>8 9</sup>. Thus, the

1  
2  
3 90 Centers for Disease Control and Prevention (CDC) and the World Health Organization (WHO)  
4  
5  
6 91 have been telling people to stop touching their faces.  
7

8 92  
9  
10 93 However, even we all know that stop touching our faces will minimize spread of coronavirus and  
11  
12 94 other germs. The question is how to stop this behavior? Although face-touching is often an  
13  
14 95 automatic behavior without conscious thought or decision, research indicates that the frequency  
15  
16 96 of self-touching and the duration of touch and contact are associated with cognitive and  
17  
18 97 emotional demands<sup>10 11</sup>. In addition to emotional states, especially negative affect states, self-  
19  
20 98 touching also has been linked to information processing and production<sup>12</sup>.  
21  
22  
23  
24  
25  
26  
27

28 100 Raising self-awareness of face-touching behavior may be effective in reducing or avoiding this  
29  
30 101 behavior. For example, every time when you touch your face, be mindful, notice how you  
31  
32 102 touched your face, check what you are thinking, physical and psychological feeling or your  
33  
34 103 sensation that preceded it. This process or skill is similar to “mindfulness practice” developed by  
35  
36 104 Jon Kabat Zinn<sup>13</sup>. Mindfulness can be defined as “*Mindful Awareness is the moment-by-moment*  
37  
38 105 *process of actively and openly observing one’s physical, mental and emotional experiences*”  
39  
40 106 (Mindful Awareness Research Center at the University of California at Los Angeles). Mindfulness-  
41  
42 107 based interventions (MBIs) are proven to be clinically efficacious in treatment of behavioral  
43  
44 108 disorders, such as alcohol drinking, smoking, gambling<sup>14 15</sup>, attention deficit/hyperactivity  
45  
46 109 disorder (ADHD)<sup>16</sup>, eating disorders<sup>17 18</sup>, as well as in enhancing the emotional health of Chinese  
47  
48 110 long-term male prison inmates<sup>19</sup>. Increasing peoples' awareness of their habituated face-  
49  
50  
51  
52 111 touching behavior may help individuals to avoid touching their face by contaminated hands, and  
53  
54  
55  
56  
57  
58  
59  
60

1  
2  
3 112 decrease the risk of spreading infectious diseases. The structured MBIs, such as mindfulness-  
4  
5  
6 113 based stress reduction (MBRS) and mindfulness-based cognitive therapy (MBCT) program, are 8  
7  
8 114 to 10 weeks course<sup>20-23</sup>, but brief MBIs can also produce numerous health-related outcomes,  
9  
10  
11 115 even only with one session intervention and as brief as 5 minutes<sup>24 25</sup>. Randomized controlled  
12  
13 116 trials (RCT) of a brief mindfulness-based intervention further suggested the feasibility and  
14  
15 117 effectiveness of short-term, self-guided, internet or smartphone-based interventions<sup>26 27</sup>.

18 118  
19  
20 119 The primary objective of this proposed project is to identify a simple but effective practice to  
21  
22  
23 120 reduce or avoid face-touching to low people's chances of catching infectious diseases like COVID-  
24  
25 121 19. Based on the efficacy of MBIs in treatment of some behavioral disorders and the efficacy of  
26  
27  
28 122 short-term MBIs, we here propose a RCT of an online mindfulness-based brief intervention skill  
29  
30 123 named "STOP (Stop, Take a Breath, Observe, Proceed) touching your face". It is hypothesized  
31  
32  
33 124 that this skill will be an effective, feasible, accessible skill in reducing or avoiding face-touching  
34  
35 125 for people in the general population. To be specific, the primary hypothesis of this brief  
36  
37  
38 126 behavioral intervention is that, compared with a control intervention, the intervention would  
39  
40 127 result in greater reduction of frequency of face-touching. We also hypothesize that the length of  
41  
42  
43 128 face-touching behavior will also be reduced. Based on the theory that both face-touching  
44  
45 129 behavior and mindfulness link to cognitive or emotional process<sup>10 22</sup>, we hypothesize that people  
46  
47  
48 130 with higher levels of self-reported mindfulness will touch their face less frequently. Given left-  
49  
50 131 handed individuals more frequently touch their face than their counterparts<sup>5</sup>, It is hypothesized  
51  
52 132 that, compared with right-handed participants, left-handed individuals will touch their face more  
53  
54  
55 133 frequently during their self-monitoring of face-touching.

1  
2  
3 1346 135 **Methods and analysis**9 136 **Patient and public involvement**

11 137 Neither participants nor the public were involved in the design, recruitment or conduct of the  
12  
13  
14 138 study.

16 139

19 140 **Study design and participants**

21 141 In this single-blind, randomized, parallel-group trial, undertaken in China by internet, about 1,000  
22  
23 142 participants willing to participate in “STOP touching your face” training program and provide  
24  
25  
26 143 electronic consent, will be randomly allocated to mindfulness-based “STOP touching your face”  
27  
28 144 intervention group or a control group at a 1:1 ratio. A 2 × 2 (practice group and control  
29  
30  
31 145 group × pre–post measurements) experimental design will be used. All participants  
32  
33 146 who are allocated to the control group will have the opportunity to practice this skill after the  
34  
35  
36 147 end of the study period. An overview of participant eligibility criteria is given in **Table1**.

38 148

41 149 **Sample size and power calculation**

43 150 This study aims to recruit 1000 participants, with 500 in each group. The sample size assessment  
44  
45 151 and power calculations are mainly on the basis of the results of RCTs of different types of  
46  
47  
48 152 behavioral intervention--stop smoking behavior<sup>28</sup>, as well as smartphone-based mindfulness  
49  
50  
51 153 intervention<sup>27</sup> and the “Learning Mindfulness Online” intervention<sup>26</sup>. The RCT of mindfulness  
52  
53 154 training for smoking cessation screened 757 participants, assessed 134 eligible participants,  
54  
55 155 randomized 88 participants with more than 70% participants completed all follow-up interviews.

1  
2  
3 156 Individuals who received mindfulness intervention showed a trend toward greater 1-week point  
4  
5 prevalence abstinence (stop smoking behavior) at the end of treatment (36% vs. 15%). It is  
6 157  
7 estimated that, for assessing stop face-touching behavior, a total of 128 participants (64  
8 158  
9 participants in each group) are required to achieve 80% power (1-beta=0.8), as significant at the  
10 159  
11 5% level ( $\alpha=0.05$ ), an increase in the primary outcome measure from 15% in the control  
12 160  
13 group to 36% in the intervention group. However, online interventions often have much higher  
14 161  
15 dropout rate than face to face intervention. The smartphone-based RCT assessed 537  
16 162  
17 participants with only 194 participants had been randomized to intervention group (n=97) or  
18 163  
19 control group(n=97). There were only 13 participants partially completed follow up measures in  
20 164  
21 the intervention and 11 participants in the control group. The overall loss to follow-up rate was  
22 165  
23 as high as more than 80% in this RCT. The online program invited 111 participants and  
24 166  
25 randomized 104 participants (50 participants in the Wait-list control group and 54 participants in  
26 167  
27 the intervention group). 70% (n=35) from control group and 43%(n=23) from the intervention  
28 168  
29 group completed post-intervention measures. Considering the high loss to follow-up rate, this  
30 169  
31 study will have a final target sample size of 1000 participants (500 in each arm), which will have  
32 170  
33 sufficient power to detect a significant difference.  
34  
35  
36  
37  
38  
39  
40  
41  
42  
43  
44

### 173 **Recruitment**

45  
46  
47 174 As in other similar research, we will advertise this program online using websites, social media  
48  
49 (such as WeChat, QQ). to recruit potential participants. Potential participants will register their  
50 175  
51 interest by sending messages by social media, email or sending text messages, or making a call  
52 176  
53 to research assistants (by Dr. Y Wang and Dr. Z Wu). Then, research assistants will contact  
54 177  
55  
56  
57  
58  
59  
60

1  
2  
3 178 respondents to assess their eligibility and explain the study to each participant and inform them  
4  
5  
6 179 that they would be allocated to either a control group or to a group that receives the  
7  
8 180 Mindfulness-based “STOP touching your face” program. Before collecting baseline data,  
9  
10  
11 181 electronically informed consent will be obtained from each participant. Participants who enrolled  
12  
13 182 in this study could withdraw at any time. They will also be asked to provide contact information  
14  
15 183 (will not be shared with any third party), in case any problems arise.  
16  
17

18 184

### 19 20 185 **Baseline data**

21  
22  
23 186 Prior to randomization, demographic information and self-reported questionnaires will be  
24  
25 187 obtained from all participants at baseline (assessed by Dr. Y Liao, Dr. C Pan and Dr. Q Luo). The  
26  
27  
28 188 demographic information of participants will be gender, age, years of education, marital status,  
29  
30 189 occupation by the International Standard Classification of Occupations (ISCO), living in rural or  
31  
32 190 urban region, smoker types (nonsmoker or current smoker and former smoker). The Five Facets  
33  
34  
35 191 Mindfulness Questionnaire (FFMQ) will be applied to measure the dispositional tendency to  
36  
37 192 be mindful in daily life. The Edinburgh Handedness Inventory (EHI) will be used to assess  
38  
39  
40 193 handedness. Frequency and length of face-touching will be assessed at baseline and after  
41  
42 194 intervention.  
43  
44

45 195

### 46 47 196 **Randomization and group allocation**

48  
49  
50 197 Participants will be randomized and assigned (by Dr. Y Liu) to the intervention or control group.  
51  
52 198 Randomization will be run by randomizeR, (<https://CRAN.R-project.org/package=randomizeR>).  
53  
54  
55 199 All Investigators will be masked to participants' treatment assignment until all data have been  
56  
57

1  
2  
3 200 collected. The investigators (by Dr. J Tang and Dr. Y Liu) who will analyze the data for evaluating  
4  
5 201 outcomes will still be blinded to participants' treatment allocations until the entire analysis has  
6  
7  
8 202 been completed.  
9

10  
11 203

## 12 13 204 **Development of “STOP touching your face” training program**

### 14 15 205 ***Theory***

16  
17  
18 206 Face-touching behavior is often an automatic behavior that could potentially disseminate  
19  
20 207 respiratory infections (eg, influenza, coronavirus), yet can be changed. However, changing the  
21  
22 208 behavior of face-touching is “easier said than done”, as there is only limited evidence for the  
23  
24  
25 209 neuropsychological basis or physiological fundamentals of this behavior. Research shows that  
26  
27 210 the frequency of self-touching increases when attention is distracted<sup>10</sup>, as well as under stressful  
28  
29 211 situations or with negative affect<sup>11</sup>. Cognitive behavioral theory-based mindfulness intervention  
30  
31 212 (mindfulness-based cognitive therapy, MBCT<sup>23</sup>) has been used as a psychological intervention for  
32  
33 213 people with mental or behavior problems, targeting both cognitive and behavioral problems.  
34  
35 214 Mindfulness-based interventions (MBIs)<sup>13</sup> can help people cultivate positive affect, increase self-  
36  
37 215 awareness and concentration that are associated with reducing frequency of face-touching.  
38  
39

### 40 41 42 216 ***Practice***

43  
44  
45 217 STOP<sup>29</sup> is an acronym that stands for four action: “Stop”, “Take a breath”, “Observe”, “Proceed”.  
46  
47 218 It is a helpful aid in becoming more mindful of our body, behavior and emotion on a daily basis.  
48  
49 219 The following is the instruction for how to practice STOP:

### 50 51 52 220 **S = Stop**

53  
54 221 Remind yourself to STOP. Whatever you are doing in this moment (e.g. touching your mouth,  
55  
56  
57

1  
2  
3 222 pinching your nose, rubbing your eyes, resting your chin on your hands), pause for a minute.  
4  
5

6 223 **T = Take**  
7

8 224 Take a deep breath. This reconnects you with your body. Pay attention to your breathing and  
9  
10 225 just allow yourself to continue to breathe normally and naturally.  
11  
12

13 226 **O = Observe**  
14

15 227 OBSERVE what is happening for you in this moment—including thoughts, feelings, and  
16  
17 228 emotions (e.g. feel distracted, anxious or nervous?). What do you notice in your body (e.g. feel  
18  
19 229 itchy or tingling on any part of your face)? You can be aware of anything: posture, sensations,  
20  
21 230 tension in your body, or, once again, your breath. You might notice the sound around you. You  
22  
23 231 might even notice your thoughts or emotions  
24  
25  
26

27 232 **P = Proceed**  
28

29  
30 233 Proceed with whatever you were doing before you came to a STOP or something that you want  
31  
32 234 to do in the moment (e.g. proceed with touching your face, or stop face-touching and take an  
33  
34 235 alternative behavior).  
35  
36

37 236 The STOP Practice is very short, simple, and the acronym (STOP) makes it easy to remember as  
38  
39 237 well. Thus, it has become one of the most popular mindfulness-based practices. The practice of  
40  
41 238 STOP may cultivate a space between stimulus and response, which could help avoid the mostly  
42  
43 239 spontaneous behavior of facial self-touching. The “STOP touching your face” training program in  
44  
45 240 Chinese was already developed by Dr. Y Liao, Dr. Q Luo and Dr. C Pan. Both text and audio  
46  
47 241 description (see Supplementary Material) will be available.  
48  
49  
50

51  
52 242  
53  
54  
55  
56  
57  
58  
59  
60



1  
2  
3 243 **Intervention**

4  
5  
6 244 ***Intervention group***

7  
8 245 Eligible participants who are allocated to the intervention group will be required to find a time  
9  
10 246 to monitor and record their behavior of hand-to-face contacts, including the frequency and  
11  
12  
13 247 length (in second) of face-touching in any of the mucosal area (eyes, nose, mouth) and  
14  
15 248 nonmucosal area (ears, cheeks, chin, neck, forehead, hair) during a 60-minute period. Then, they  
16  
17  
18 249 will receive the online mindfulness-based “STOP touching your face” program. Each participant  
19  
20 250 will be required to practice this technique until they feel confident and natural. The systematic  
21  
22  
23 251 review showed the efficacy of single session of brief MBIs, the average length of which was  
24  
25 252 15 minutes, ranged from less than 5 to 25 min<sup>24</sup>. Thus, the requirement practice time will be 15  
26  
27  
28 253 minutes. Later (with a one-hour interval), they will be asked to self-monitor and report their one-  
29  
30 254 hour face-touching behavior again by send them messages via social media app (mainly WeChat).  
31  
32 255 This online mindfulness-based intervention will not have face-to-face interaction between the  
33  
34  
35 256 experimenter and participants throughout the entire study.

36  
37 257 ***Control group***

38  
39  
40 258 Participants who allocate to the control group will only receive information to thank them and  
41  
42 259 encourage them to complete the study. They will receive “STOP touching your face” program  
43  
44  
45 260 after the end of this study. The repeat measurement of the face-touching behavior will be done  
46  
47 261 in a one-hour interval.

48  
49 262 ***Both groups***

50  
51  
52 263 Participants from both groups will be required to provide information about face-touching  
53  
54 264 behavior before and after intervention. The self-monitoring behavior of face-touching will be  
55  
56  
57

1  
2  
3 265 asked to be recorded before and after “STOP touching your face” or control intervention. All  
4  
5  
6 266 participants will be encouraged to practice it regularly after the end of the study.  
7

8 267

## 10 268 **Follow-up**

12  
13 269 In order to measure the changes of face-touching behavior before and after intervention,  
14  
15 270 frequency and length of face-touching in a 60-minute period will also be self-monitored and  
16  
17  
18 271 reported after intervention for groups with or without “STOP touching your face” practice, with  
19  
20 272 a one-hour interval between the repeated measures. All outcomes will be collected by an online  
21  
22  
23 273 survey through the Chinese professional survey software WenJuanXing (Sojump, Shanghai, China,  
24  
25 274 [www.sojump.com](http://www.sojump.com)). For non-responders, a reminding message will be sent to them by their  
26  
27  
28 275 provided contact information for reporting the outcomes.  
29

30 276

## 32 277 **Outcomes**

34  
35 278 **Primary outcome:** the efficacy of short-term mindfulness-based “STOP touching your face”  
36  
37 279 intervention for reducing the frequency of face-touching.  
38

39  
40 280 **Secondary outcomes:** the reduction of the duration of face-touching after intervention; the  
41  
42 281 correlation between the psychological traits of mindfulness and face-touching behavior; the  
43  
44  
45 282 differences of face-touching behavior between left-handers and right-handers.  
46

47 283

## 49 284 **Measures**

51  
52 285 **1. Frequency and length of face-touching:** Self-observation or self-monitoring of face-touching  
53  
54 286 behavior will be required to report from each participant. A standardized scoring sheet will be  
55  
56  
57

287 provided to tally the frequency of hand-to-face contacts, the touched area of the face, including  
288 the mucosal area (eyes, nose, mouth) and nonmucosal area (ears, cheeks, chin, neck, forehead,  
289 hair) , and the time in seconds of each contact will be recorded in a 60-minute period <sup>4</sup>.

290 **2. Five Facet Mindfulness Questionnaire (FFMQ)**<sup>30-32</sup>: this self-report scale is currently the most  
291 frequently used mindfulness questionnaire to measure changes in participant's tendency to be  
292 mindful in daily life by the following five related facets: observing(noticing, attending to  
293 sensations, perceptions, thoughts, feelings; 8 items), describing (labeling feelings, thoughts with  
294 words), acting with awareness (automatic pilot, concentration, non-distraction), non-judging  
295 internal experience, and non-reactivity to internal experience. Participants will be asked to what  
296 extent each of the statements are true of them. Each item is on a 1 to 5 Likert scale, ranging from  
297 1 (never or very rarely true) to 5 (very often or always true). The scores represent a spectrum of  
298 mindfulness with no cut-off points, higher scores indicate higher levels of mindfulness. The  
299 factor structure of the short version (FFMQ-15) will be used in this study, which has been  
300 consistent with that of the FFMQ-39<sup>33</sup>.

301 **3. The Edinburgh Handedness Inventory (EHI)** <sup>34 35</sup>: EHI is the most widely used 10-item self-  
302 report inventory to assess handedness. It is comprised of the following 10 activities: (1) writing,  
303 (2) drawing, (3) throwing, (4) using scissors, (5) a toothbrush (6) knife (without fork), (7) spoon,  
304 and such activities involving both hands as (8) using a broom (upper hand), (9) striking a match,  
305 and (10) unscrewing the lid of a bottle. To complete the EHI, one or two check marks are placed  
306 under "left (L)" or "right (R)" columns, indicating strength of preference for each activity.  
307 Participants will be asked write "2", "1" or "0" in the appropriate corresponding column. If the  
308 preference is very strong that they would never try to use the other hand unless absolutely forced

1  
2  
3 309 to, then they will mark this column as “2” and the other column as “0”. If they are really  
4  
5  
6 310 indifferent, they will mark it as “1” in both columns. A laterality quotient ( $LQ = R - L/R + L \times 100$ )  
7  
8 311 can be calculated, where a score of 100 reflects complete right-handedness, and a score of -100  
9  
10 312 reflects complete left-handedness.

11  
12  
13 313

14  
15 314 **Procedures**

For peer review only

1  
2  
3 315 After advertising, participants who are interested in this study will be assessed for eligibility by  
4  
5  
6 316 making a call or communicating with social media (mainly WeChat). Then, eligible participants  
7  
8 317 will complete baseline information, and information about frequency and length of face-touching  
9  
10 318 in a 60-minute period by self-monitoring. Afterwards, one group will receive a brief mindfulness-  
11  
12  
13 319 based “STOP touching your face” intervention and other control intervention. With a one-hour  
14  
15 320 interval, a follow-up assessment of face-touching behavior will be taken for both groups. The  
16  
17  
18 321 schedule of enrolment and one follow-up assessment summarizes in **Figure 1**.

322

### 323 **Withdrawal from the Program**

324 Every participant will feel free to withdraw from the study at any time and without giving any  
325 reason. On the basis of the intention-to-treat (ITT) principle<sup>36</sup>, participants who fail to respond to  
326 follow-up assessment will be retained in the analysis and classified as those who continued the  
327 same behavior. Only participants who request withdrawal from the study will be excluded from  
328 the analysis, and reasons for withdrawal will be noted if they are available.

329

### 330 **Data collection**

331 Data will be collected on line by WenJuanXing, a Chinese online market research Web site that  
332 provides professional online questionnaire survey or data collection for RCTs<sup>37</sup>. Data will be  
333 monitored by data monitoring committee of the hospital. Personal data will be de-identified.

334

### 335 **Data analysis**

1  
2  
3 336 All data will be automatically collected by internet. A user-specified Excel file will be downloaded  
4  
5  
6 337 from the database. There will be no interim analyses. When all data have been obtained, they  
7  
8 338 will be analyzed and blinded to intervention assignment by the trial statistician using R software  
9  
10  
11 339 (R Foundation for Statistical Computing, Vienna, Austria. <https://www.r-project.org/>) and SPSS  
12  
13 340 (IBM Corp. Released 2013. IBM SPSS Statistics for Windows, Version 22.0. Armonk, NY: IBM Corp.).  
14  
15 341 Descriptive statistics will be performed to determine the frequency of touches in a 60-minute  
16  
17 342 period. In order to determine if the intervention group showed a reduction of face-touching  
18  
19 343 behavior than the control group, pre- and posttest mean scores by group and “STOP touching  
20  
21 344 your face” intervention effects will be analyzed with 2 (group) × 2 (time), repeated measures  
22  
23 345 ANACOVAs (analysis of covariance) (controlling for handedness and prior mindfulness meditation  
24  
25 346 experience);  $\chi^2$  test will be applied to rates of none face-touching behavior between intervention  
26  
27 347 and control groups, and between left-handers and right-handers; T-test will be applied to assess  
28  
29 348 the differences of face-touching behavior duration between intervention and control groups, and  
30  
31 349 between left-handers and right-hander; Pearson's correlations will be used to explore the  
32  
33 350 correlation between the psychological traits of mindfulness and face-touching behavior;  
34  
35 351 intention-to-treat (ITT) basis will be applied in this study to handle incomplete or missing data.  
36  
37 352 All tests will be 2-tailed. A two-sided  $P < 0.05$  will be used to determine statistical significance.  
38  
39  
40  
41  
42  
43  
44  
45  
46

#### 354 **Safety**

47  
48  
49 355 Throughout the “STOP touching your face” program, participants will be encouraged to  
50  
51 356 communicate with us if they experience any mindfulness practice relative issues. Adverse events  
52  
53 357 will be monitored during the study. The MBIs are regarded as relatively safe interventions<sup>38</sup>.  
54  
55  
56  
57  
58  
59  
60

1  
2  
3 358 Research showed that even highly vulnerable participants (such as patients with major  
4  
5  
6 359 depressive disorder<sup>39</sup>) can safely practice mindfulness, but if participants experience any health-  
7  
8 360 related issues, they will be encouraged to contact with us or a health care provider.  
9

10  
11 361

### 12 13 362 **Ethics and dissemination**

14  
15 363 The study protocol has been approved by The Ethics Committee of Sir Run Run Shaw hospital, an  
16  
17 364 affiliate of Zhejiang University, Medical College (NO. 20200401-32). All activities associated with  
18  
19 365 this protocol will be conducted in full compliance with the approved policies and procedures.  
20  
21 366 Electronically Informed consent (this e-consent is a form of written consent) will be  
22  
23 367 communicated and obtained from each participant prior to participation. All participant will be  
24  
25 368 explained about the purpose, procedures and assessments, potential risks and benefits of the  
26  
27 369 trial before recruitment. After fully understanding the study, participants will be informed that  
28  
29 370 their participation in this research study is total voluntary. They can choose to (sign the  
30  
31 371 electronic consent form by selecting “agree to participant”) or not to participate (sign the  
32  
33 372 electronic consent form by selecting “disagree to participant”). Participation can withdrawal at  
34  
35 373 any time without reasons. Contact information (phone number and social media contact like  
36  
37 374 WeChat contact ID) of the study coordinator for any future questions and concerns will be  
38  
39 375 provided and informed to each participant. We will recruit 1000 participants from April to June  
40  
41 376 2020 or until the recruitment process is complete. The follow-up will be completed in June 2020.  
42  
43 377 We expect all trial results to be available by the end of June 2020. Any results from this trial  
44  
45 378 (publications, conference presentations) will be disseminated via social media and be published  
46  
47 379 in peer-reviewed journals and conference proceedings.  
48  
49  
50  
51  
52  
53  
54  
55  
56  
57  
58  
59  
60

1  
2  
3 3804  
5  
6 381 **Discussion**

7  
8 382 This RCT is to investigate the efficacy of brief mindfulness-based intervention of “STOP touching  
9 383 your face” for people from general population in China. To our knowledge, this will be the first  
10  
11 384 RCT to evaluate the efficacy of brief mindfulness intervention to reduce face-touching behavior  
12  
13 385 on the basis of mindfulness and cognitive behavioral principles.  
14  
15

16 386

17  
18  
19  
20 387 The strength of this study is that this is a theoretical framework guided (mindfulness-based  
21  
22 388 cognitive behavior theory) large sample size RCT to evaluate the efficacy of “STOP touching your  
23  
24 389 face” during the outbreak of COVID-19. If “STOP touching your face” program is proved to be  
25  
26 390 effective, it opens up its potential application worldwide at the population level. As “STOP  
27  
28 391 touching your face” program is a free, brief, simple and widely accessible mindfulness-based  
29  
30 392 behavior change intervention, the public health impact of its expansion world-wide could be  
31  
32 393 enormous, helping us to manage any face-touching spread infectious diseases, like COVID-19.  
33  
34  
35  
36

37 394

38  
39  
40 395 There are some limitations in this study. First, there is no digital videotape recording for the  
41  
42 396 behavior of face-touching by researchers. Alternatively, it will be self-monitored. Self-monitoring  
43  
44 397 of physical (such as blood pressure), and mental health (such as anger or frustration that comes  
45  
46 398 from daily life) has been used as a strategy for improving the treatment of a number of chronic  
47  
48 399 conditions or reducing unhealth behaviors including smoking, drinking, gambling and so on<sup>40</sup>.  
49  
50 400 Thus, self-monitoring itself may change participants face-touching behavior by creating a more  
51  
52 401 active role in observing this behavior. Second, this is only an online intervention, participants may  
53  
54  
55  
56



1  
2  
3 402 be more likely to drop out from the study. Thus, we will encourage participants contact with us  
4  
5  
6 403 if they have any questions or concerns. We will also apply an intention-to-treat principle to  
7  
8 404 prevent potential bias caused by missing data from loss to follow-up. Third, this is only a brief  
9  
10 405 intervention by internet. A face to face long-term mindfulness intervention will help participants  
11  
12  
13 406 gain the maximum benefits of practice. However, neuroimaging study demonstrates that both  
14  
15 407 long and short-term mindfulness practice can improve automatic emotion regulation<sup>41</sup>, and RCT  
16  
17  
18 408 shows that brief online mindfulness-based intervention can also increase mindfulness and  
19  
20 409 decrease perceived stress and symptoms of anxiety or depression<sup>26</sup>.

21  
22  
23 410  
24  
25 411 In conclusion, this is the first RCT to evaluate the efficacy of brief mindfulness intervention to  
26  
27  
28 412 reduce face-touching behavior. If “STOP touching your face”, a brief and simple skill, is proven  
29  
30 413 effective, the public health impact of its expansion world-wide could be enormous, its  
31  
32  
33 414 dissemination will help us to manage any face-touching spread infectious diseases, like  
34  
35 415 Coronavirus disease 2019 (COVID-19).

36  
37 416  
38  
39  
40 417 **Availability of data and materials**  
41  
42 418 All data in the current study will be available from the corresponding author on reasonable  
43  
44  
45 419 request and with completion of data user agreement.

46  
47 420  
48  
49  
50 421 **Authors' Contributions**  
51  
52 422 YLiao and JT developed and designed the study. YLiao took the lead in drafting the manuscript  
53  
54  
55 423 protocol with contributions by JT, LW, WC, CP, QL, JC and XG advised the study design, and

1  
2  
3 424 coordinated study approval. All authors read and proposed critical comments, as well as  
4  
5  
6 425 approved the manuscript for publication.  
7

8 426

### 10 427 **Funding**

12  
13 428 The research is supported by Zhejiang University special scientific research fund for COVID-19  
14  
15 429 prevention and control (2020XGZX046), the “Hundred Talents Program” funding from Zhejiang  
16  
17  
18 430 University, and the K.C. Wong Postdoctoral Fellowship to study at King's College London (KCL).  
19  
20 431 The funders had no role in study design, data collection and analysis, decision to write the report  
21  
22  
23 432 or to submit the paper for publication.  
24

25 433

### 27 434 **Competing interests statement**

28  
29  
30 435 No potential conflicts of interest to declare.  
31

32 436

### 34 437 **Acknowledgements**

35  
36  
37 438 Dr. Y Liao would like to thank Professor Ann McNeill from KCL for her suggestions and thank 5P  
38  
39 439 Medicine (5P Yixue APP) for providing STOP audio description (see supplementary file). Dr. Y Liao,  
40  
41  
42 440 Dr. C Pan and Dr. Q Luo would like to thank the UCLA (the University of California at Los Angeles)  
43  
44  
45 441 Mindful Awareness Research Center for providing opportunities to them to learn and practice  
46  
47 442 mindfulness.  
48

49 443

### 51 444 **References**

52  
53  
54  
55 445 1. Harrigan JA, Kues JR, Weber JG. Impressions of hand movements: Self-touching and gestures.  
56 446 *Perceptual and motor skills* 1986;63(2):503-16.  
57

- 1  
2  
3 447 2. Krout MH. Autistic gestures: An experimental study in symbolic movement. *Psychological*  
4 448 *Monographs* 1935;46(4):i.
- 5 449 3. Nicas M, Best D. A study quantifying the hand-to-face contact rate and its potential application to  
6 450 predicting respiratory tract infection. *Journal of occupational and environmental hygiene*  
7 451 2008;5(6):347-52.
- 8 452 4. Kwok YLA, Gralton J, McLaws M-L. Face touching: A frequent habit that has implications for hand  
9 453 hygiene. *American journal of infection control* 2015;43(2):112-14.
- 10 454 5. Dimond S, Harries R. Face touching in monkeys, apes and man: Evolutionary origins and cerebral  
11 455 asymmetry. *Neuropsychologia* 1984;22(2):227-33.
- 12 456 6. Measurement of Face-touching Frequency in a Simulated Train. E3S Web of Conferences; 2019. EDP  
13 457 Sciences.
- 14 458 7. Elder NC, Sawyer W, Pallerla H, et al. Hand hygiene and face touching in family medicine offices: a  
15 459 Cincinnati Area Research and Improvement Group (CARInG) network study. *The Journal of the*  
16 460 *American Board of Family Medicine* 2014;27(3):339-46.
- 17 461 8. Huang C, Wang Y, Li X, et al. Clinical features of patients infected with 2019 novel coronavirus in  
18 462 Wuhan, China. *The Lancet* 2020;395(10223):497-506.
- 19 463 9. Ong SWX, Tan YK, Chia PY, et al. Air, surface environmental, and personal protective equipment  
20 464 contamination by severe acute respiratory syndrome coronavirus 2 (SARS-CoV-2) from a  
21 465 symptomatic patient. *Jama* 2020
- 22 466 10. Mueller SM, Martin S, Grunwald M. Self-touch: Contact durations and point of touch of spontaneous  
23 467 facial self-touches differ depending on cognitive and emotional load. *PloS one* 2019;14(3)
- 24 468 11. Grunwald M, Weiss T, Mueller S, et al. EEG changes caused by spontaneous facial self-touch may  
25 469 represent emotion regulating processes and working memory maintenance. *brain research*  
26 470 2014;1557:111-26.
- 27 471 12. Harrigan JA. Self-touching as an indicator of underlying affect and language processes. *Social science*  
28 472 *& medicine* 1985;20(11):1161-68.
- 29 473 13. Kabat-Zinn J. Mindfulness-based interventions in context: past, present, and future. *Clinical*  
30 474 *psychology: Science and practice* 2003;10(2):144-56.
- 31 475 14. Cavicchioli M, Movalli M, Maffei C. The Clinical Efficacy of Mindfulness-Based Treatments for Alcohol  
32 476 and Drugs Use Disorders: A Meta-Analytic Review of Randomized and Nonrandomized  
33 477 Controlled Trials. *European addiction research* 2018;24(3):137-62. doi: 10.1159/000490762  
34 478 [published Online First: 2018/07/18]
- 35 479 15. Sancho M, De Gracia M, Rodríguez RC, et al. Mindfulness-based interventions for the treatment of  
36 480 substance and behavioral addictions: a systematic review. *Frontiers in psychiatry* 2018;9:95.
- 37 481 16. Haydicky J, Wiener J, Badali P, et al. Evaluation of a mindfulness-based intervention for adolescents  
38 482 with learning disabilities and co-occurring ADHD and anxiety. *Mindfulness* 2012;3(2):151-64.
- 39 483 17. Kristeller JL, Wolever RQ. Mindfulness-based eating awareness training for treating binge eating  
40 484 disorder: the conceptual foundation. *Eating disorders* 2010;19(1):49-61.
- 41 485 18. Wanden-Berghe RG, Sanz-Valero J, Wanden-Berghe C. The application of mindfulness to eating  
42 486 disorders treatment: a systematic review. *Eating disorders* 2010;19(1):34-48.
- 43 487 19. Xu W, Jia K, Liu X, et al. The effects of mindfulness training on emotional health in Chinese long-term  
44 488 male prison inmates. *Mindfulness* 2016;7(5):1044-51.
- 45 489 20. Shonin E, Van Gordon W, Griffiths M. Mindfulness-based interventions: Towards mindful clinical  
46 490 integration. *Frontiers in Psychology* 2013;4:194.
- 47 491 21. Carmody J, Baer RA. Relationships between mindfulness practice and levels of mindfulness, medical  
48 492 and psychological symptoms and well-being in a mindfulness-based stress reduction program.  
49 493 *Journal of behavioral medicine* 2008;31(1):23-33.

- 1  
2  
3 494 22. Grossman P, Niemann L, Schmidt S, et al. Mindfulness-based stress reduction and health benefits: A  
4 495 meta-analysis. *Journal of psychosomatic research* 2004;57(1):35-43.
- 5 496 23. Segal ZV, Teasdale J. Mindfulness-based cognitive therapy for depression: Guilford Publications  
6 497 2018.
- 7 498 24. Howarth A, Smith JG, Perkins-Porras L, et al. Effects of Brief Mindfulness-Based Interventions on  
8 499 Health-Related Outcomes: a Systematic Review. *Mindfulness* 2019:1-12.
- 9 500 25. Chen Y, Yang X, Wang L, et al. A randomized controlled trial of the effects of brief mindfulness  
10 501 meditation on anxiety symptoms and systolic blood pressure in Chinese nursing students. *Nurse*  
11 502 *education today* 2013;33(10):1166-72.
- 12 503 26. Cavanagh K, Strauss C, Cicconi F, et al. A randomised controlled trial of a brief online mindfulness-  
13 504 based intervention. *Behaviour research and therapy* 2013;51(9):573-78.
- 14 505 27. Howells A, Ivtzan I, Eiroa-Orosa FJ. Putting the 'app' in happiness: a randomised controlled trial of a  
15 506 smartphone-based mindfulness intervention to enhance wellbeing. *Journal of Happiness Studies*  
16 507 2016;17(1):163-85.
- 17 508 28. Brewer JA, Mallik S, Babuscio TA, et al. Mindfulness training for smoking cessation: results from a  
18 509 randomized controlled trial. *Drug and alcohol dependence* 2011;119(1-2):72-80.
- 19 510 29. Smalley SL, Winston D. Fully present: The science, art, and practice of mindfulness: Da Capo Lifelong  
20 511 Books 2010.
- 21 512 30. Deng Y-Q, Liu X-H, Rodriguez MA, et al. The five facet mindfulness questionnaire: psychometric  
22 513 properties of the Chinese version. *Mindfulness* 2011;2(2):123-28.
- 23 514 31. de Bruin EI, Topper M, Muskens JG, et al. Psychometric properties of the Five Facets Mindfulness  
24 515 Questionnaire (FFMQ) in a meditating and a non-meditating sample. *Assessment*  
25 516 2012;19(2):187-97.
- 26 517 32. Baer RA, Smith GT, Hopkins J, et al. Using self-report assessment methods to explore facets of  
27 518 mindfulness. *Assessment* 2006;13(1):27-45.
- 28 519 33. Gu J, Strauss C, Crane C, et al. Examining the factor structure of the 39-item and 15-item versions of  
29 520 the Five Facet Mindfulness Questionnaire before and after mindfulness-based cognitive therapy  
30 521 for people with recurrent depression. *Psychological assessment* 2016;28(7):791.
- 31 522 34. Yang N, Waddington G, Adams R, et al. Translation, cultural adaptation, and test-retest reliability of  
32 523 Chinese versions of the Edinburgh Handedness Inventory and Waterloo Footedness  
33 524 Questionnaire. *Laterality: Asymmetries of Body, Brain and Cognition* 2018;23(3):255-73.
- 34 525 35. Oldfield RC. The assessment and analysis of handedness: the Edinburgh inventory. *Neuropsychologia*  
35 526 1971;9(1):97-113.
- 36 527 36. Montori VM, Guyatt GH. Intention-to-treat principle. *Cmaj* 2001;165(10):1339-41.
- 37 528 37. Fitzpatrick T, Zhou K, Cheng Y, et al. A crowdsourced intervention to promote hepatitis B and C  
38 529 testing among men who have sex with men in China: study protocol for a nationwide online  
39 530 randomized controlled trial. *BMC infectious diseases* 2018;18(1):489.
- 40 531 38. Wong SY, Chan JY, Zhang D, et al. The safety of mindfulness-based interventions: a systematic review  
41 532 of randomized controlled trials. *Mindfulness* 2018;9(5):1344-57.
- 42 533 39. Piet J, Hougaard E. The effect of mindfulness-based cognitive therapy for prevention of relapse in  
43 534 recurrent major depressive disorder: a systematic review and meta-analysis. *Clinical psychology*  
44 535 *review* 2011;31(6):1032-40.
- 45 536 40. Kim JY, Wineinger NE, Steinhubl SR. The influence of wireless self-monitoring program on the  
46 537 relationship between patient activation and health behaviors, medication adherence, and blood  
47 538 pressure levels in hypertensive patients: a substudy of a randomized controlled trial. *Journal of*  
48 539 *medical Internet research* 2016;18(6):e116.
- 49 540 41. Kral TR, Schuyler BS, Mumford JA, et al. Impact of short-and long-term mindfulness meditation  
50 541 training on amygdala reactivity to emotional stimuli. *Neuroimage* 2018;181:301-13.

1  
2  
3  
4  
5  
6  
7  
8  
9  
10  
11  
12  
13  
14  
15  
16  
17  
18  
19  
20  
21  
22  
23  
24  
25  
26  
27  
28  
29  
30  
31  
32  
33  
34  
35  
36  
37  
38  
39  
40  
41  
42  
43  
44  
45  
46  
47  
48  
49  
50  
51  
52  
53  
54  
55  
56  
57  
58  
59  
60

542

For peer review only

1  
2  
3 543 **Figure Legend**

4 544

5  
6 545 **Figure 1** Study Flow Diagram  
7  
8  
9  
10  
11  
12  
13  
14  
15  
16  
17  
18  
19  
20  
21  
22  
23  
24  
25  
26  
27  
28  
29  
30  
31  
32  
33  
34  
35  
36  
37  
38  
39  
40  
41  
42  
43  
44  
45  
46  
47  
48  
49  
50  
51  
52  
53  
54  
55  
56  
57  
58  
59  
60

For peer review only

1  
2  
3 546 **Table1** study inclusion and exclusion criteria

---

4 Inclusion Criteria:

- 5  
6 1. 18 years of age or older  
7 2. Being able to access online services  
8 3. Being able to read and write in Chinese  
9 4. Expressing an interest in participant this study  
10 5. Willing to provide informed consent to participate in the study

11 Exclusion Criteria:

- 12  
13 1. Under 18 years of age  
14 2. Unable to access online services  
15 3. Unable to read and write in Chinese
- 

16 547

548 **Figure 1**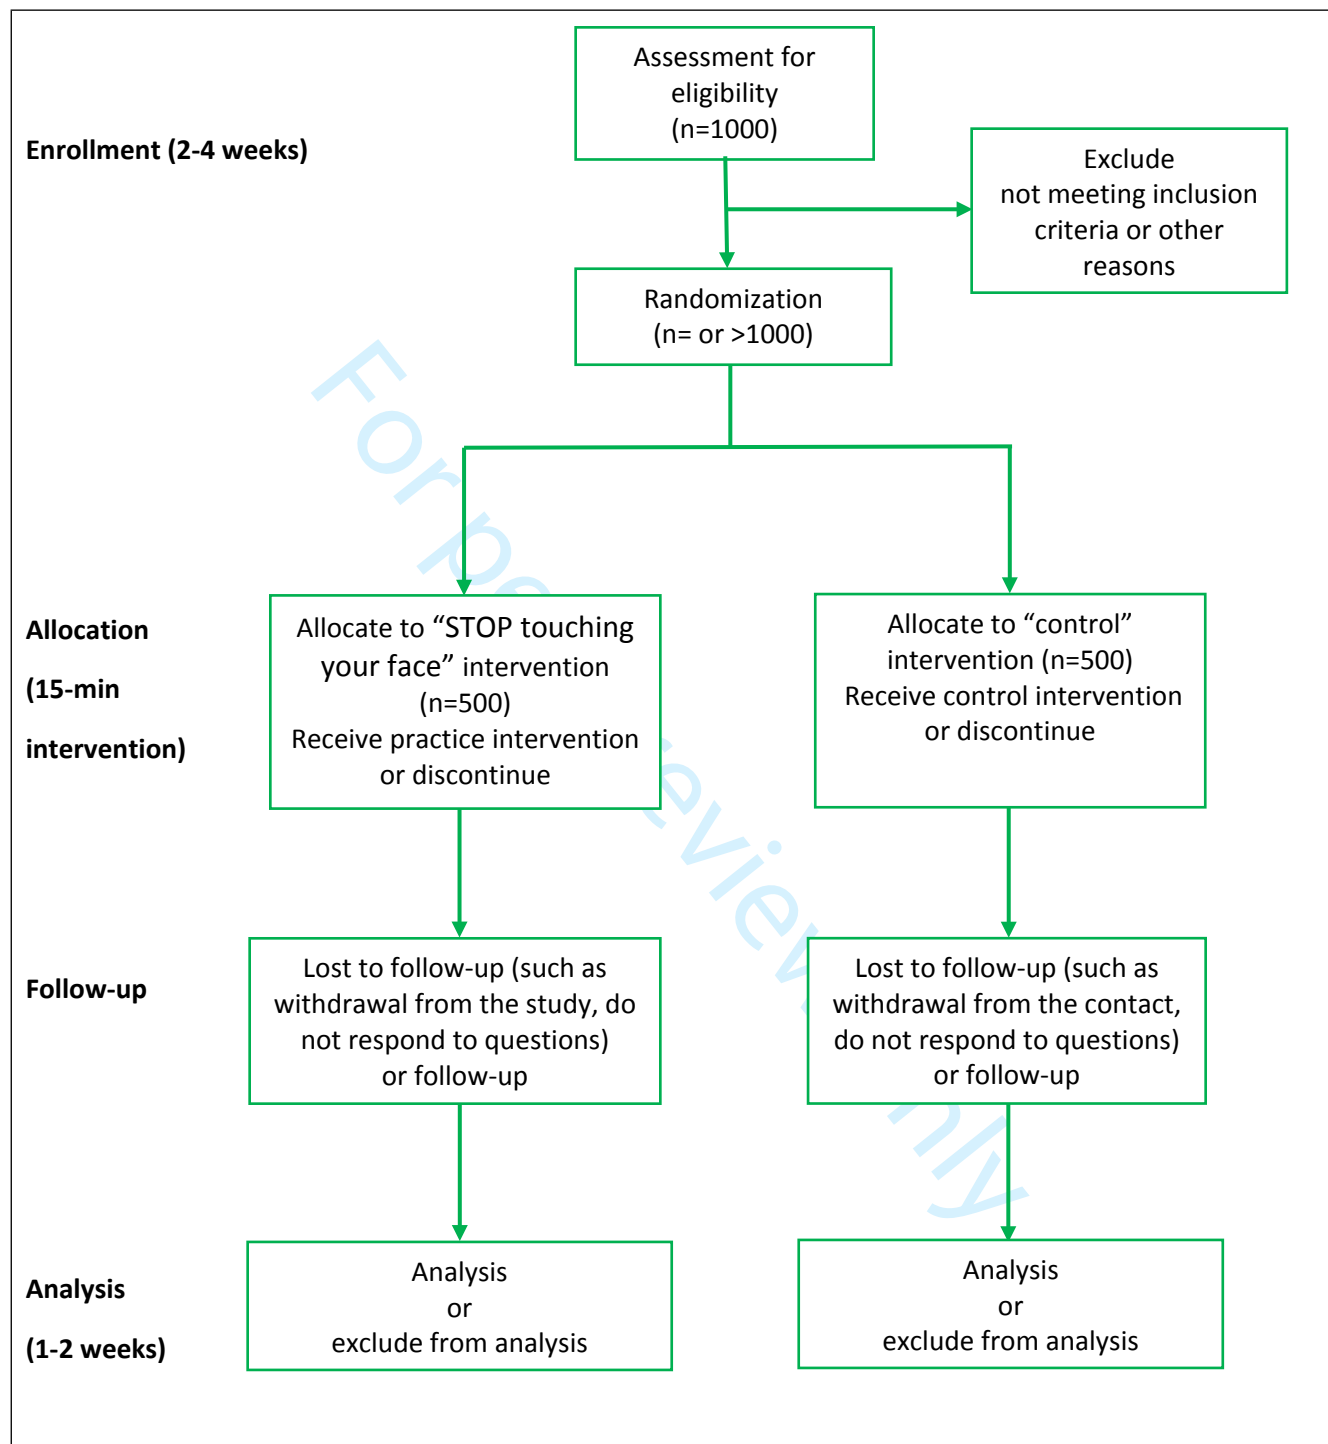

549



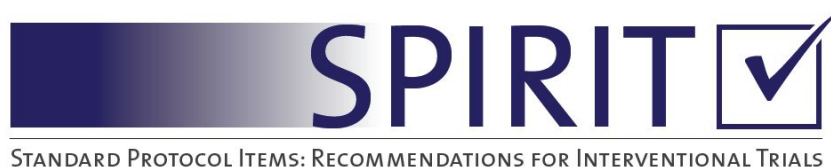

STANDARD PROTOCOL ITEMS: RECOMMENDATIONS FOR INTERVENTIONAL TRIALS

SPIRIT 2013 Checklist: Recommended items to address in a clinical trial protocol and related documents\*

| Section/item                                        | Item No | Description                                                                                                                                                                                                                                                                              |
|-----------------------------------------------------|---------|------------------------------------------------------------------------------------------------------------------------------------------------------------------------------------------------------------------------------------------------------------------------------------------|
| <b>Administrative information</b>                   |         |                                                                                                                                                                                                                                                                                          |
| P1,1-3 Title                                        | 1       | Descriptive title identifying the study design, population, interventions, and, if applicable, trial acronym                                                                                                                                                                             |
| P4, 54 Trial registration                           | 2a      | Trial identifier and registry name. If not yet registered, name of intended registry                                                                                                                                                                                                     |
|                                                     | 2b      | All items from the World Health Organization Trial Registration Data Set                                                                                                                                                                                                                 |
| Not applicable, Protocol version                    | 3       | Date and version identifier                                                                                                                                                                                                                                                              |
| P21,427-432 Funding                                 | 4       | Sources and types of financial, material, and other support                                                                                                                                                                                                                              |
| P1-2, 5-31; P22, 437-442 Roles and responsibilities | 5a      | Names, affiliations, and roles of protocol contributors                                                                                                                                                                                                                                  |
|                                                     | 5b      | Name and contact information for the trial sponsor                                                                                                                                                                                                                                       |
|                                                     | 5c      | Role of study sponsor and funders, if any, in study design; collection, management, analysis, and interpretation of data; writing of the report; and the decision to submit the report for publication, including whether they will have ultimate authority over any of these activities |
|                                                     | 5d      | Composition, roles, and responsibilities of the coordinating centre, steering committee, endpoint adjudication committee, data management team, and other individuals or groups overseeing the trial, if applicable (see Item 21a for data monitoring committee)                         |
| <b>Introduction</b>                                 |         |                                                                                                                                                                                                                                                                                          |
| P5-7, 69-117 Background and rationale               | 6a      | Description of research question and justification for undertaking the trial, including summary of relevant studies (published and unpublished) examining benefits and harms for each intervention                                                                                       |
|                                                     | 6b      | Explanation for choice of comparators                                                                                                                                                                                                                                                    |
| P7 119-133 Objectives                               | 7       | Specific objectives or hypotheses                                                                                                                                                                                                                                                        |

1  
2 P8, 141-145 Trial 8 Description of trial design including type of trial (eg, parallel group,  
3 design crossover, factorial, single group), allocation ratio, and framework (eg,  
4 superiority, equivalence, noninferiority, exploratory)  
5  
6  
7

### 8 **Methods: Participants, interventions, and outcomes**

9  
10 P8, 141 Study 9 Description of study settings (eg, community clinic, academic hospital)  
11 setting and list of countries where data will be collected. Reference to where  
12 list of study sites can be obtained  
13

14 P8, 147 P26, 546- 10 Inclusion and exclusion criteria for participants. If applicable, eligibility  
15 547 Eligibility criteria for study centres and individuals who will perform the  
16 criteria interventions (eg, surgeons, psychotherapists)  
17  
18

19 P13-14, 243-266 11a Interventions for each group with sufficient detail to allow replication,  
20 Interventions including how and when they will be administered  
21

22 11b Criteria for discontinuing or modifying allocated interventions for a  
23 given trial participant (eg, drug dose change in response to harms,  
24 participant request, or improving/worsening disease)  
25

26 11c Strategies to improve adherence to intervention protocols, and any  
27 procedures for monitoring adherence (eg, drug tablet return,  
28 laboratory tests)  
29

30 11d Relevant concomitant care and interventions that are permitted or  
31 prohibited during the trial  
32  
33

34 P14, 277-282 12 Primary, secondary, and other outcomes, including the specific  
35 Outcomes measurement variable (eg, systolic blood pressure), analysis metric  
36 (eg, change from baseline, final value, time to event), method of  
37 aggregation (eg, median, proportion), and time point for each  
38 outcome. Explanation of the clinical relevance of chosen efficacy and  
39 harm outcomes is strongly recommended  
40  
41

42 P19, 375-377; 13 Time schedule of enrolment, interventions (including any run-ins and  
43 P16, 314-321 washouts), assessments, and visits for participants. A schematic  
44 Participant diagram is highly recommended (see Figure)  
45 timeline  
46  
47

48 P8-9, 149-171 14 Estimated number of participants needed to achieve study objectives  
49 Sample size and how it was determined, including clinical and statistical  
50 assumptions supporting any sample size calculations  
51

52 Recruitment 15 Strategies for achieving adequate participant enrolment to reach  
53 target sample size  
54  
55

### 56 **Methods: Assignment of interventions (for controlled trials)**

57 Allocation:  
58  
59  
60

|    |                                                           |     |                                                                          |
|----|-----------------------------------------------------------|-----|--------------------------------------------------------------------------|
| 1  |                                                           |     |                                                                          |
| 2  | P10, 197-198                                              | 16a | Method of generating the allocation sequence (eg, computer-              |
| 3  | Sequence                                                  |     | generated random numbers), and list of any factors for stratification.   |
| 4  | generation                                                |     | To reduce predictability of a random sequence, details of any planned    |
| 5  |                                                           |     | restriction (eg, blocking) should be provided in a separate document     |
| 6  |                                                           |     | that is unavailable to those who enrol participants or assign            |
| 7  |                                                           |     | interventions                                                            |
| 8  |                                                           |     |                                                                          |
| 9  |                                                           |     |                                                                          |
| 10 | P10-11, 199-                                              | 16b | Mechanism of implementing the allocation sequence (eg, central           |
| 11 | 200                                                       |     | telephone; sequentially numbered, opaque, sealed envelopes),             |
| 12 | Allocation                                                |     | describing any steps to conceal the sequence until interventions are     |
| 13 | concealment                                               |     | assigned                                                                 |
| 14 | mechanism                                                 |     |                                                                          |
| 15 |                                                           |     |                                                                          |
| 16 |                                                           |     |                                                                          |
| 17 | P10, 197                                                  | 16c | Who will generate the allocation sequence, who will enrol participants,  |
| 18 | Implementation                                            |     | and who will assign participants to interventions                        |
| 19 |                                                           |     |                                                                          |
| 20 | P10, 200-202                                              | 17a | Who will be blinded after assignment to interventions (eg, trial         |
| 21 | Blinding                                                  |     | participants, care providers, outcome assessors, data analysts), and     |
| 22 | (masking)                                                 |     | how                                                                      |
| 23 |                                                           |     |                                                                          |
| 24 |                                                           | 17b | If blinded, circumstances under which unblinding is permissible, and     |
| 25 |                                                           |     | procedure for revealing a participant's allocated intervention during    |
| 26 |                                                           |     | the trial                                                                |
| 27 |                                                           |     |                                                                          |
| 28 |                                                           |     |                                                                          |
| 29 | <b>Methods: Data collection, management, and analysis</b> |     |                                                                          |
| 30 |                                                           |     |                                                                          |
| 31 | P17, 330-333                                              | 18a | Plans for assessment and collection of outcome, baseline, and other      |
| 32 | Data collection                                           |     | trial data, including any related processes to promote data quality (eg, |
| 33 | methods                                                   |     | duplicate measurements, training of assessors) and a description of      |
| 34 |                                                           |     | study instruments (eg, questionnaires, laboratory tests) along with      |
| 35 |                                                           |     | their reliability and validity, if known. Reference to where data        |
| 36 |                                                           |     | collection forms can be found, if not in the protocol                    |
| 37 |                                                           |     |                                                                          |
| 38 |                                                           |     |                                                                          |
| 39 |                                                           | 18b | Plans to promote participant retention and complete follow-up,           |
| 40 |                                                           |     | including list of any outcome data to be collected for participants who  |
| 41 |                                                           |     | discontinue or deviate from intervention protocols                       |
| 42 |                                                           |     |                                                                          |
| 43 |                                                           |     |                                                                          |
| 44 | P17, 335-340                                              | 19  | Plans for data entry, coding, security, and storage, including any       |
| 45 | Data                                                      |     | related processes to promote data quality (eg, double data entry;        |
| 46 | management                                                |     | range checks for data values). Reference to where details of data        |
| 47 |                                                           |     | management procedures can be found, if not in the protocol               |
| 48 |                                                           |     |                                                                          |
| 49 |                                                           |     |                                                                          |
| 50 | P17-18, 341-352                                           | 20a | Statistical methods for analysing primary and secondary outcomes.        |
| 51 | Statistical                                               |     | Reference to where other details of the statistical analysis plan can be |
| 52 | methods                                                   |     | found, if not in the protocol                                            |
| 53 |                                                           |     |                                                                          |
| 54 |                                                           | 20b | Methods for any additional analyses (eg, subgroup and adjusted           |
| 55 |                                                           |     | analyses)                                                                |
| 56 |                                                           |     |                                                                          |
| 57 |                                                           | 20c | Definition of analysis population relating to protocol non-adherence     |
| 58 |                                                           |     | (eg, as randomised analysis), and any statistical methods to handle      |
| 59 |                                                           |     | missing data (eg, multiple imputation)                                   |
| 60 |                                                           |     |                                                                          |

**Methods: Monitoring**

|                                 |     |                                                                                                                                                                                                                                                                                                                                       |
|---------------------------------|-----|---------------------------------------------------------------------------------------------------------------------------------------------------------------------------------------------------------------------------------------------------------------------------------------------------------------------------------------|
| P17, 332-333<br>Data monitoring | 21a | Composition of data monitoring committee (DMC); summary of its role and reporting structure; statement of whether it is independent from the sponsor and competing interests; and reference to where further details about its charter can be found, if not in the protocol. Alternatively, an explanation of why a DMC is not needed |
|                                 | 21b | Description of any interim analyses and stopping guidelines, including who will have access to these interim results and make the final decision to terminate the trial                                                                                                                                                               |
| P18, 354-360<br>Harms           | 22  | Plans for collecting, assessing, reporting, and managing solicited and spontaneously reported adverse events and other unintended effects of trial interventions or trial conduct                                                                                                                                                     |
| Auditing                        | 23  | Frequency and procedures for auditing trial conduct, if any, and whether the process will be independent from investigators and the sponsor                                                                                                                                                                                           |

**Ethics and dissemination**

|                                              |     |                                                                                                                                                                                                                                  |
|----------------------------------------------|-----|----------------------------------------------------------------------------------------------------------------------------------------------------------------------------------------------------------------------------------|
| P21, 429-431<br>Research ethics approval     | 24  | Plans for seeking research ethics committee/institutional review board (REC/IRB) approval                                                                                                                                        |
| Protocol amendments                          | 25  | Plans for communicating important protocol modifications (eg, changes to eligibility criteria, outcomes, analyses) to relevant parties (eg, investigators, REC/IRBs, trial participants, trial registries, journals, regulators) |
| P18-19, 362-375<br>Consent or assent         | 26a | Who will obtain informed consent or assent from potential trial participants or authorised surrogates, and how (see Item 32)                                                                                                     |
|                                              | 26b | Additional consent provisions for collection and use of participant data and biological specimens in ancillary studies, if applicable                                                                                            |
| P10, 182-183<br>P17, 333<br>Confidentiality  | 27  | How personal information about potential and enrolled participants will be collected, shared, and maintained in order to protect confidentiality before, during, and after the trial                                             |
| P21, 434-435<br>Declaration of interests     | 28  | Financial and other competing interests for principal investigators for the overall trial and each study site                                                                                                                    |
| P11, 200-202<br>Access to data               | 29  | Statement of who will have access to the final trial dataset, and disclosure of contractual agreements that limit such access for investigators                                                                                  |
| P8, 145-147<br>Ancillary and post-trial care | 30  | Provisions, if any, for ancillary and post-trial care, and for compensation to those who suffer harm from trial participation                                                                                                    |

|                                                                                                                                                                                                                |                                         |     |                                                                                                                                                                                                                                                                                     |
|----------------------------------------------------------------------------------------------------------------------------------------------------------------------------------------------------------------|-----------------------------------------|-----|-------------------------------------------------------------------------------------------------------------------------------------------------------------------------------------------------------------------------------------------------------------------------------------|
| 1<br>2<br>3<br>4<br>5<br>6<br>7<br>8<br>9<br>10<br>11<br>12<br>13                                                                                                                                              | P19, 377-379<br>Dissemination<br>policy | 31a | Plans for investigators and sponsor to communicate trial results to participants, healthcare professionals, the public, and other relevant groups (eg, via publication, reporting in results databases, or other data sharing arrangements), including any publication restrictions |
| 14<br>15<br>16<br>17<br>18<br>19<br>20<br>21<br>22<br>23<br>24<br>25                                                                                                                                           |                                         | 31b | Authorship eligibility guidelines and any intended use of professional writers                                                                                                                                                                                                      |
| 26<br>27<br>28<br>29<br>30<br>31<br>32<br>33<br>34<br>35<br>36<br>37<br>38<br>39<br>40<br>41<br>42<br>43<br>44<br>45<br>46<br>47<br>48<br>49<br>50<br>51<br>52<br>53<br>54<br>55<br>56<br>57<br>58<br>59<br>60 |                                         | 31c | Plans, if any, for granting public access to the full protocol, participant-level dataset, and statistical code                                                                                                                                                                     |

## Appendices

|                                                                                                                                                                                                                |                                                            |    |                                                                                                                                                                                                |
|----------------------------------------------------------------------------------------------------------------------------------------------------------------------------------------------------------------|------------------------------------------------------------|----|------------------------------------------------------------------------------------------------------------------------------------------------------------------------------------------------|
| 16<br>17<br>18<br>19<br>20<br>21<br>22<br>23<br>24<br>25                                                                                                                                                       | In supplementary<br>file,<br>Informed consent<br>materials | 32 | Model consent form and other related documentation given to participants and authorised surrogates                                                                                             |
| 26<br>27<br>28<br>29<br>30<br>31<br>32<br>33<br>34<br>35<br>36<br>37<br>38<br>39<br>40<br>41<br>42<br>43<br>44<br>45<br>46<br>47<br>48<br>49<br>50<br>51<br>52<br>53<br>54<br>55<br>56<br>57<br>58<br>59<br>60 | Not applicable,<br>Biological<br>specimens                 | 33 | Plans for collection, laboratory evaluation, and storage of biological specimens for genetic or molecular analysis in the current trial and for future use in ancillary studies, if applicable |

---

\*It is strongly recommended that this checklist be read in conjunction with the SPIRIT 2013 Explanation & Elaboration for important clarification on the items. Amendments to the protocol should be tracked and dated. The SPIRIT checklist is copyrighted by the SPIRIT Group under the Creative Commons "[Attribution-NonCommercial-NoDerivs 3.0 Unported](https://creativecommons.org/licenses/by-nc-nd/3.0/)" license.

# BMJ Open

## A brief mindfulness-based intervention of "STOP (Stop, Take a Breath, Observe, Proceed) touching your face": a study protocol of a randomized controlled trial

|                                 |                                                                                                                                                                                                                                                                                                                                                                                                                                                                                                                                                                                                                                                                                                                                                                                                                                                                                                                                                                                                                                                                                                                                                                                                                                                                                                                                                                                                                                                                                                                                                                                                                                                                                                                                                                                                                                                                                                                                                                                                 |
|---------------------------------|-------------------------------------------------------------------------------------------------------------------------------------------------------------------------------------------------------------------------------------------------------------------------------------------------------------------------------------------------------------------------------------------------------------------------------------------------------------------------------------------------------------------------------------------------------------------------------------------------------------------------------------------------------------------------------------------------------------------------------------------------------------------------------------------------------------------------------------------------------------------------------------------------------------------------------------------------------------------------------------------------------------------------------------------------------------------------------------------------------------------------------------------------------------------------------------------------------------------------------------------------------------------------------------------------------------------------------------------------------------------------------------------------------------------------------------------------------------------------------------------------------------------------------------------------------------------------------------------------------------------------------------------------------------------------------------------------------------------------------------------------------------------------------------------------------------------------------------------------------------------------------------------------------------------------------------------------------------------------------------------------|
| Journal:                        | <i>BMJ Open</i>                                                                                                                                                                                                                                                                                                                                                                                                                                                                                                                                                                                                                                                                                                                                                                                                                                                                                                                                                                                                                                                                                                                                                                                                                                                                                                                                                                                                                                                                                                                                                                                                                                                                                                                                                                                                                                                                                                                                                                                 |
| Manuscript ID                   | bmjopen-2020-041364.R1                                                                                                                                                                                                                                                                                                                                                                                                                                                                                                                                                                                                                                                                                                                                                                                                                                                                                                                                                                                                                                                                                                                                                                                                                                                                                                                                                                                                                                                                                                                                                                                                                                                                                                                                                                                                                                                                                                                                                                          |
| Article Type:                   | Protocol                                                                                                                                                                                                                                                                                                                                                                                                                                                                                                                                                                                                                                                                                                                                                                                                                                                                                                                                                                                                                                                                                                                                                                                                                                                                                                                                                                                                                                                                                                                                                                                                                                                                                                                                                                                                                                                                                                                                                                                        |
| Date Submitted by the Author:   | 18-Aug-2020                                                                                                                                                                                                                                                                                                                                                                                                                                                                                                                                                                                                                                                                                                                                                                                                                                                                                                                                                                                                                                                                                                                                                                                                                                                                                                                                                                                                                                                                                                                                                                                                                                                                                                                                                                                                                                                                                                                                                                                     |
| Complete List of Authors:       | <p>Liao, Yanhui; Zhejiang University School of Medicine Sir Run Run Shaw Hospital, Department of Psychiatry ; Key Laboratory of Medical Neurobiology of Zhejiang Province,<br/> Wang, Ling ; Florence Nightingale Faculty of Nursing, Midwifery &amp; Palliative Care,<br/> Luo, Tao ; Department of Social Medicine and Health Management, Xiangya School of Public Health, Central South University; Jiangxi Mental Hospital<br/> Wu, Shiyu ; The Third Affiliated Hospital of Guizhou Medical University<br/> Wu, Zhenzhen; Department of Psychiatry, the Second Xiangya Hospital, Central South University; National Clinical Research Center on Mental Disorders<br/> Chen, Jianhua ; Shanghai Clinical Research Center for Mental Health, Shanghai Key Laboratory of Psychotic Disorders, Shanghai Mental Health Center, Shanghai Jiao Tong University School of Medicine<br/> Pan, Chen ; Department of Clinical Psychology, the Third Xiangya Hospital, Central South University<br/> Wang, Yunfei; Department of Psychiatry, the Second Xiangya Hospital, Central South University; National Clinical Research Center on Mental Disorders<br/> Liu, Yueheng ; Department of Psychiatry, the Second Xiangya Hospital, Central South University; National Clinical Research Center on Mental Disorders<br/> Luo, Qinghua ; The first affiliated hospital of Chongqing Medical University<br/> Guo, Xin ; Psychiatry department, Renmin Hospital of Wuhan University<br/> Xie, Liqin; Changsha Social Work College<br/> Zhou, Jun ; Changsha Social Work College<br/> Chen, Wei ; Zhejiang University School of Medicine Sir Run Run Shaw Hospital, Department of Psychiatry, the Second Xiangya Hospital, Central South University; 2. Key Laboratory of Medical Neurobiology of Zhejiang Province,<br/> Tang, Jinsong; Zhejiang University School of Medicine Sir Run Run Shaw Hospital, Department of Psychiatry ; 2. Key Laboratory of Medical Neurobiology of Zhejiang Province,</p> |
| <b>Primary Subject Heading</b>: | Public health                                                                                                                                                                                                                                                                                                                                                                                                                                                                                                                                                                                                                                                                                                                                                                                                                                                                                                                                                                                                                                                                                                                                                                                                                                                                                                                                                                                                                                                                                                                                                                                                                                                                                                                                                                                                                                                                                                                                                                                   |

1  
2  
3  
4  
5  
6  
7  
8  
9  
10  
11  
12  
13  
14  
15  
16  
17  
18  
19  
20  
21  
22  
23  
24  
25  
26  
27  
28  
29  
30  
31  
32  
33  
34  
35  
36  
37  
38  
39  
40  
41  
42  
43  
44  
45  
46  
47  
48  
49  
50  
51  
52  
53  
54  
55  
56  
57  
58  
59  
60

|                                                                                                                                                         |                                                                                                                                                      |
|---------------------------------------------------------------------------------------------------------------------------------------------------------|------------------------------------------------------------------------------------------------------------------------------------------------------|
| Secondary Subject Heading:                                                                                                                              | Mental health, Infectious diseases                                                                                                                   |
| Keywords:                                                                                                                                               | EDUCATION & TRAINING (see Medical Education & Training), MENTAL HEALTH, PUBLIC HEALTH, Health & safety < HEALTH SERVICES ADMINISTRATION & MANAGEMENT |
|                                                                                                                                                         |                                                                                                                                                      |
| Note: The following files were submitted by the author for peer review, but cannot be converted to PDF. You must view these files (e.g. movies) online. |                                                                                                                                                      |
| Supplementary file 1_STOP_practice.mp3                                                                                                                  |                                                                                                                                                      |

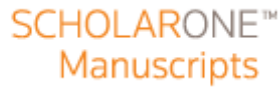



I, the Submitting Author has the right to grant and does grant on behalf of all authors of the Work (as defined in the below author licence), an exclusive licence and/or a non-exclusive licence for contributions from authors who are: i) UK Crown employees; ii) where BMJ has agreed a CC-BY licence shall apply, and/or iii) in accordance with the terms applicable for US Federal Government officers or employees acting as part of their official duties; on a worldwide, perpetual, irrevocable, royalty-free basis to BMJ Publishing Group Ltd ("BMJ") its licensees and where the relevant Journal is co-owned by BMJ to the co-owners of the Journal, to publish the Work in this journal and any other BMJ products and to exploit all rights, as set out in our [licence](#).

The Submitting Author accepts and understands that any supply made under these terms is made by BMJ to the Submitting Author unless you are acting as an employee on behalf of your employer or a postgraduate student of an affiliated institution which is paying any applicable article publishing charge ("APC") for Open Access articles. Where the Submitting Author wishes to make the Work available on an Open Access basis (and intends to pay the relevant APC), the terms of reuse of such Open Access shall be governed by a Creative Commons licence – details of these licences and which [Creative Commons](#) licence will apply to this Work are set out in our licence referred to above.

Other than as permitted in any relevant BMJ Author's Self Archiving Policies, I confirm this Work has not been accepted for publication elsewhere, is not being considered for publication elsewhere and does not duplicate material already published. I confirm all authors consent to publication of this Work and authorise the granting of this licence.



1  
2  
3  
4 1 **A brief mindfulness-based intervention of “STOP (Stop, Take a Breath,**  
5  
6  
7 2 **Observe, Proceed) touching your face”:** a study protocol of a  
8  
9  
10 3 **randomized controlled trial**  
11  
12  
13 4  
14

15 5 Yanhui Liao<sup>1,2,3\*</sup>; Ling Wang<sup>4</sup>; Tao Luo<sup>5,6</sup>; Shiyu Wu<sup>7</sup>; Zhenzhen Wu<sup>8,9</sup>; Jianhua Chen<sup>10</sup>; Chen  
16  
17 6 Pan<sup>11</sup>; Yunfei Wang<sup>8,9</sup>; Yueheng Liu<sup>8,9</sup>; Qinghua Luo<sup>12</sup>; Xin Guo<sup>13</sup>; Liqin Xie<sup>14</sup>; Jun Zhou<sup>14</sup>; Wei  
18  
19  
20 7 Chen<sup>1,2</sup>; Jinsong Tang<sup>1,2</sup>  
21

- 22  
23 8 1. Department of Psychiatry, Sir Run Run Shaw Hospital, School of Medicine, Zhejiang University,  
24  
25 9 Hangzhou, China  
26  
27 10 2. Key Laboratory of Medical Neurobiology of Zhejiang Province, Hangzhou, China  
28  
29  
30 11 3. Addictions Department, Institute of Psychiatry, Psychology and Neuroscience, King's College  
31  
32 12 London, London, UK  
33  
34  
35 13 4. Florence Nightingale Faculty of Nursing, Midwifery & Palliative Care, King's College London,  
36  
37 14 London, UK  
38  
39  
40 15 5. Department of Social Medicine and Health Management, Xiangya School of Public Health,  
41  
42 16 Central South University, Changsha, China  
43  
44  
45 17 6. Jiangxi Mental Hospital, Nanchang, China  
46  
47 18 7. The Third Affiliated Hospital of Guizhou Medical University, Qiannan, China  
48  
49  
50 19 8. Department of Psychiatry, the Second Xiangya Hospital, Central South University, Changsha,  
51  
52 20 China  
53  
54  
55 21 9. National Clinical Research Center on Mental Disorders, Changsha, China  
56  
57  
58  
59  
60

- 1  
2  
3 22 10. Shanghai Clinical Research Center for Mental Health, Shanghai Key Laboratory of Psychotic  
4  
5  
6 23 Disorders, Shanghai Mental Health Center, Shanghai Jiao Tong University School of Medicine,  
7  
8 24 Shanghai, China  
9  
10  
11 25 11. Department of Clinical Psychology, the Third Xiangya Hospital, Central South University,  
12  
13 26 Changsha, China  
14  
15 27 12. The first affiliated hospital of Chongqing Medical University, Chongqing, China  
16  
17  
18 28 13. Psychiatry department, Renmin Hospital of Wuhan University, Wuhan, China  
19  
20  
21 29 14. Changsha Social Work College, Changsha, China  
22  
23 30 \*Corresponding Author: Yanhui Liao, 3 East Qingchun Road, Hangzhou, Zhejiang, P. R. China  
24  
25 31 (310016). E-mail: [liaoyanhui@zju.edu.cn](mailto:liaoyanhui@zju.edu.cn)  
26  
27  
28  
29  
30  
31  
32  
33  
34  
35  
36  
37  
38  
39  
40  
41  
42  
43  
44  
45  
46  
47  
48  
49  
50  
51  
52  
53  
54  
55  
56  
57  
58  
59  
60

## 32 **Abstract**

33 **Introduction** Face-touching behavior often happens frequently and automatically, and poses  
34 potential risk for spreading infectious disease. Mindfulness-based interventions (MBIs) have  
35 shown its efficacy in the treatment of behavior disorders. This study aims to evaluate an online  
36 mindfulness-based brief intervention skill named “STOP (Stop, Take a Breath, Observe, Proceed)  
37 touching your face” in reducing face-touching behavior.

38 **Methods and analysis** This will be a single-blind, randomized, controlled, trial. We will recruit  
39 1,000 participants, and will randomize and allocate participants 1:1 to the “STOP touching your  
40 face” (both 750-word text and 5-min audio description by online) intervention group (n=500) and  
41 the wait-list control group (n=500). All participants will be asked to monitor and record their face-  
42 touching behavior during a 60-minute period before and after the intervention. Primary outcome  
43 will be the efficacy of short-term mindfulness-based “STOP touching your face” intervention for  
44 reducing the frequency of face-touching. The secondary outcomes will be the reduction of the  
45 duration of face-touching after intervention; the correlation between the psychological traits of  
46 mindfulness and face-touching behavior; and the differences of face-touching behavior between  
47 left-handers and right-handers. Analysis of covariance, regression analysis,  $\chi^2$  test, T-test,  
48 Pearson's correlations will be applied in data analysis. We will recruit 1000 participants from April  
49 to July 2020 or until the recruitment process is complete. The follow-up will be completed in July  
50 2020. We expect all trial results to be available by the end of July 2020.

51 **Ethics and dissemination** The study protocol has been approved by The Ethics Committee of Sir  
52 Run Run Shaw hospital, an affiliate of Zhejiang University, Medical College (NO. 20200401-32).  
53 Study results will be disseminated via social media and peer-reviewed publications.

1  
2  
3 54 **Trial registration number** NCT04330352.  
4  
5

6 55

7  
8 56 **Strengths and limitations of this study**  
9

10 57 • This is the first RCT to evaluate the efficacy of brief mindfulness intervention to reduce face-  
11  
12 touching behavior.  
13 58

14  
15 59 • This is a theoretical framework guided (mindfulness-based cognitive behavior theory) large  
16  
17 sample size RCT to evaluate the efficacy of “STOP touching your face” during the outbreak of  
18 60  
19 COVID-19.  
20 61

21  
22  
23 62 • “STOP touching your face” program is a free, brief, simple and widely accessible mindfulness-  
24  
25 based behavior change intervention.  
26 63

27  
28 64 • There is no digital videotape recording for the behavior of face-touching by researchers.  
29  
30 Alternatively, it will be self-monitored.  
31 65

32  
33 66 • This is only a brief intervention by internet. A face to face long-term mindfulness intervention  
34  
35 will help participants gain the maximum benefits of practice.  
36 67  
37  
38  
39  
40  
41  
42  
43  
44  
45  
46  
47  
48  
49  
50  
51  
52  
53  
54  
55  
56  
57  
58  
59  
60

## 69 Introduction

70 Nonverbal behavior plays an important role in interpersonal relations and constitutes a large  
71 amount of all communication. But self-touching is usually not used to communicate with others  
72 and is often done automatically without thinking about it at all in our daily life<sup>1</sup>. It might be one  
73 of the so called "autistic" gestures when they have no evident meaning<sup>2</sup>. Spontaneous facial self-  
74 touching or face-touching has been defined as *the use of the hand to touch the individual's own*  
75 *face* to scratch, rub, groom, or caress it. Research shows that the average face-touching  
76 frequency ranges from approximately 16<sup>3</sup> to 23<sup>4</sup> times per hour. Furthermore, research of face-  
77 touching across handedness showed that left-handed individuals more frequently touch their  
78 face than their counterparts<sup>5</sup>.

79  
80 An increase in face-touching frequency may result in increased risk of transmissible infections,  
81 defined as self-inoculation or auto-inoculation (a type of contact transmission occurs when a  
82 person transfers an infectious disease from one part of the body to another, e.g., when a  
83 contaminated hand makes subsequent contact with the nose and introduces contaminated  
84 material to those areas)<sup>3 4</sup>. Of all face-touching behaviors, touching the T-zones will pose a  
85 potential risk for transmission and acquisition of a range of infectious diseases. Unfortunately,  
86 research found that 42.2%<sup>6</sup> to 44%<sup>4</sup> of face-touching involved in contacting with a mucous  
87 membrane. Even clinicians touch their T-zones (the mucus membranes of the eyes, nose, and  
88 mouth) as frequently as 19 times on average within 2 hours<sup>7</sup>. Many diseases can be spread  
89 by self-inoculation in this way, including coronavirus disease 2019 ("COVID-19")<sup>8 9</sup>. Thus, the

1  
2  
3 90 Centers for Disease Control and Prevention (CDC) and the World Health Organization (WHO)  
4  
5  
6 91 have been telling people to stop touching their faces.  
7

8 92  
9  
10 93 However, even we all know that stop touching our faces will minimize spread of coronavirus and  
11  
12 94 other germs. The question is how to stop this behavior? Although face-touching is often an  
13  
14 95 automatic behavior without conscious thought or decision, research indicates that the frequency  
15  
16 96 of self-touching and the duration of touch and contact are associated with cognitive and  
17  
18 97 emotional demands<sup>10 11</sup>. In addition to emotional states, especially negative affect states, self-  
19  
20 98 touching also has been linked to information processing and production<sup>12</sup>.  
21  
22  
23  
24

25 99  
26  
27 100 Raising self-awareness of face-touching behavior may be effective in reducing or avoiding this  
28  
29 101 behavior. For example, every time when you touch your face, be mindful, notice how you  
30  
31 102 touched your face, check what you are thinking, physical and psychological feeling or your  
32  
33 103 sensation that preceded it. This process or skill is similar to “mindfulness practice” developed by  
34  
35 104 Jon Kabat Zinn<sup>13</sup>. Mindfulness can be defined as “*Mindful Awareness is the moment-by-moment*  
36  
37 105 *process of actively and openly observing one’s physical, mental and emotional experiences*”  
38  
39 106 (Mindful Awareness Research Center at the University of California at Los Angeles). Mindfulness-  
40  
41 107 based interventions (MBIs) are proven to be clinically efficacious in treatment of behavioral  
42  
43 108 disorders, such as alcohol drinking, smoking, gambling<sup>14-16</sup>, attention deficit/hyperactivity  
44  
45 109 disorder (ADHD)<sup>17</sup>, eating disorders<sup>18 19</sup>, as well as in enhancing the emotional health of Chinese  
46  
47 110 long-term male prison inmates<sup>20</sup>. Increasing peoples' awareness of their habituated face-  
48  
49 111 touching behavior may help individuals to avoid touching their face by contaminated hands, and  
50  
51  
52  
53  
54  
55  
56  
57  
58  
59  
60

1  
2  
3 112 decrease the risk of spreading infectious diseases. The structured MBIs, such as mindfulness-  
4  
5  
6 113 based stress reduction (MBRS) and mindfulness-based cognitive therapy (MBCT) program, are 8  
7  
8 114 to 10 weeks course<sup>21-24</sup>, but brief MBIs can also produce numerous health-related outcomes,  
9  
10  
11 115 even only with one session intervention and as brief as 5 minutes<sup>25 26</sup>. Randomized controlled  
12  
13 116 trials (RCT) of a brief mindfulness-based intervention further suggested the feasibility and  
14  
15 117 effectiveness of short-term, self-guided, internet or smartphone-based interventions<sup>27 28</sup>.  
16  
17  
18 118

19  
20 119 The primary objective of this proposed project is to identify a simple but effective practice to  
21  
22  
23 120 reduce or avoid face-touching to low people's chances of catching infectious diseases like COVID-  
24  
25 121 19. Based on the efficacy of MBIs in treatment of some behavioral disorders and the efficacy of  
26  
27  
28 122 short-term MBIs, we here propose a RCT of an online mindfulness-based brief intervention skill  
29  
30 123 named "STOP (Stop, Take a Breath, Observe, Proceed) touching your face". It is hypothesized  
31  
32  
33 124 that this skill will be an effective, feasible, accessible skill in reducing or avoiding face-touching  
34  
35 125 for people in the general population. To be specific, the primary hypothesis of this brief  
36  
37  
38 126 behavioral intervention is that, compared with a control intervention, the intervention would  
39  
40 127 result in greater reduction of face-touching behavior. We also hypothesize that the frequency of  
41  
42  
43 128 face-touching behavior will also be reduced. Based on the theory that both face-touching  
44  
45 129 behavior and mindfulness link to cognitive or emotional process<sup>10 23</sup>, we hypothesize that people  
46  
47  
48 130 with higher levels of self-reported mindfulness will touch their face less frequently. Given left-  
49  
50 131 handed individuals more frequently touch their face than their counterparts<sup>5</sup>, It is hypothesized  
51  
52 132 that, compared with right-handed participants, left-handed individuals will touch their face more  
53  
54  
55 133 frequently during their self-monitoring of face-touching.  
56  
57  
58  
59  
60

134

## 135 **Methods and analysis**

### 136 **Patient and public involvement**

137 Neither participants nor the public were involved in the design, recruitment or conduct of the  
138 study.

139

### 140 **Study design and participants**

141 In this single-blind, randomized, parallel-group trial, undertaken in China by internet, about 1,000  
142 participants willing to participate in “STOP touching your face” training program and provide  
143 electronic consent (e-consent), will be randomly allocated to mindfulness-based “STOP touching  
144 your face” intervention group or a control group at a 1:1 ratio. A 2 × 2 (practice group and control  
145 group × pre–post measurements) experimental design will be used. All participants  
146 who are allocated to the control group will have the opportunity to practice this skill after the  
147 end of the study period. An overview of participant eligibility criteria is given in **Table1**.

148

### 149 **Sample size and power calculation**

150 This study aims to recruit 1000 participants, with 500 in each group. The sample size assessment  
151 and power calculations are mainly on the basis of the results of RCTs of different types of online  
152 short-term mindfulness intervention for behavioral changes, such as for alcohol consumption<sup>16</sup>  
153 and stopping smoking or decreasing smoking craving<sup>29</sup>, or for positive psychological changes,  
154 such as enhancing wellbeing<sup>28</sup> and reducing perceived stress and anxiety/depression symptoms<sup>27</sup>.  
155 A single brief session of mindfulness of 11-minutes (n=34) detected a significant reduction in



1  
2  
3 156 alcohol consumption compared with a relaxation control intervention (n=34)<sup>16</sup>. It is estimated  
4  
5  
6 157 that, for assessing stop face-touching behavior, individuals who received mindfulness  
7  
8 158 intervention will at least twice likely to reduce the chance of touching T-Zone than the control  
9  
10  
11 159 group (5 to 10% vs. 2 to 4%). Thus, a total of 562 participants (281 participants in each group) are  
12  
13 160 required to achieve 80% power (1-beta=0.8), as significant at the 5% level (alpha=0.05), an  
14  
15 161 increase in the primary outcome measure from 4% in the control group to 10% in the intervention  
16  
17 162 group. However, online interventions often have much higher dropout rate than face to face  
18  
19  
20 163 intervention. A web-based guided self-help intervention for preventing depression reported  
21  
22 164 about 20% dropout rate at 6-month follow-up<sup>30</sup>, but a brief online mindfulness-based  
23  
24 165 intervention for reducing stress, anxiety and depression reported 30% dropout rate in the  
25  
26 166 intervention group and more than a half in the waiting list control group<sup>27</sup> Considering the high  
27  
28 167 loss to follow-up rate, this study will have a final target sample size of 1000 participants (500 in  
29  
30 168 each arm), which will have sufficient power to detect a significant difference.  
31  
32  
33  
34  
35  
36  
37  
38  
39

## 170 **Recruitment**

40 171 As in other similar research, we will advertise this program online using social media (such as  
41  
42 172 WeChat and QQ) to recruit potential participants. Potential participants will register their interest  
43  
44  
45 173 by sending messages by social media, email or sending text messages, or making a call to research  
46  
47 174 assistants (by Dr. Y Wang and Dr. Z Wu). Then, research assistants will contact respondents to  
48  
49  
50 175 assess their eligibility and explain the study to each participant and inform them that they would  
51  
52 176 be allocated to either a control group or to a group that receives the Mindfulness-based “STOP  
53  
54 177 touching your face” program. Before collecting baseline data, electronically informed consent  
55  
56  
57  
58  
59  
60

1  
2  
3 178 will be obtained from each participant. Participants who enrolled in this study could withdraw at  
4  
5  
6 179 any time. They will also be asked to provide contact information (will not be shared with any third  
7  
8 180 party), in case any problems arise.  
9

10 181

### 13 182 **Baseline data**

15 183 Prior to randomization, demographic information and self-reported questionnaires will be  
16  
17  
18 184 obtained from all participants at baseline (assessed by Dr. Y Liao, Dr. C Pan and Dr. Q Luo). The  
19  
20 185 demographic information of participants will be gender, age, years of education, marital status,  
21  
22  
23 186 occupation by the International Standard Classification of Occupations (ISCO), living in rural or  
24  
25 187 urban region, smoker types (nonsmoker or current smoker and former smoker). The Five Facets  
26  
27  
28 188 Mindfulness Questionnaire (FFMQ) will be applied to measure the dispositional tendency to  
29  
30 189 be mindful in daily life. The Edinburgh Handedness Inventory (EHI) will be used to assess  
31  
32  
33 190 handedness. Frequency of face-touching will be assessed at baseline and after intervention.  
34

35 191

### 37 192 **Randomization and group allocation**

40 193 After reporting the first 60-min self-monitoring face-touching behavior, participants will be  
41  
42 194 randomized and assigned (by Dr. Y Liu) to either start the intervention immediately (intervention  
43  
44  
45 195 condition) or to a wait-list control condition (who will be offered the intervention immediately  
46  
47 196 after reporting the second 60-min self-monitoring face-touching behavior). Randomization will  
48  
49  
50 197 be run by randomizeR, (<https://CRAN.R-project.org/package=randomizeR>). All participants will  
51  
52 198 report the first self-monitoring by the same link (the same Excel file will be downloaded), and the  
53  
54  
55 199 second will be reported by two different links (two separated Excel files will be downloaded) to  
56  
57

1  
2  
3 200 detect group allocation. Group allocation will not be concealed to investigators who will provide  
4  
5  
6 201 interventions. But the investigators (by Dr. J Tang and Dr. Y Liu) who will analyze the data for  
7  
8 202 evaluating outcomes will be blinded to participants' treatment allocations until the entire  
9  
10  
11 203 analysis has been completed.

12  
13 204

## 15 205 **Development of “STOP touching your face” training program**

### 17 206 ***Theory***

18  
19  
20 207 Face-touching behavior is often an automatic behavior that could potentially disseminate  
21  
22  
23 208 respiratory infections (eg, influenza, coronavirus), yet can be changed. However, changing the  
24  
25  
26 209 behavior of face-touching is “easier said than done”, as there is only limited evidence for the  
27  
28  
29 210 neuropsychological basis or physiological fundamentals of this behavior. Research shows that  
30  
31  
32 211 the frequency of self-touching increases when attention is distracted<sup>10</sup>, as well as under stressful  
33  
34  
35 212 situations or with negative affect<sup>11</sup>. Cognitive behavioral theory-based mindfulness intervention  
36  
37  
38 213 (mindfulness-based cognitive therapy, MBCT<sup>24</sup>) has been used as a psychological intervention for  
39  
40  
41 214 people with mental or behavior problems, targeting both cognitive and behavioral problems.  
42  
43  
44 215 Mindfulness-based interventions (MBIs)<sup>13</sup> can help people cultivate positive affect, increase self-  
45  
46  
47 216 awareness and concentration that are associated with reducing frequency of face-touching.

### 48 217 ***Practice***

49  
50 218 STOP<sup>31</sup> is an acronym that stands for four action: “Stop”, “Take a breath”, “Observe”, “Proceed”.  
51  
52 219 It is a helpful aid in becoming more mindful of our body, behavior and emotion on a daily basis.  
53  
54  
55 220 The following is the instruction for how to practice STOP:

1  
2  
3 221 **S = Stop**  
4

5  
6 222 Remind yourself to STOP. Whatever you are doing in this moment (e.g. touching your mouth,  
7  
8 223 pinching your nose, rubbing your eyes, resting your chin on your hands), pause for a minute.  
9

10  
11 224 **T = Take**  
12

13 225 Take a deep breath. This reconnects you with your body. Pay attention to your breathing and  
14  
15 226 just allow yourself to continue to breathe normally and naturally.  
16

17  
18 227 **O = Observe**  
19

20 228 OBSERVE what is happening for you in this moment—including thoughts, feelings, and  
21  
22 229 emotions (e.g. feel distracted, anxious or nervous?). What do you notice in your body (e.g. feel  
23  
24 230 itchy or tingling on any part of your face)? You can be aware of anything: posture, sensations,  
25  
26 231 tension in your body, or, once again, your breath. You might notice the sound around you. You  
27  
28 232 might even notice your thoughts or emotions  
29  
30

31  
32 233 **P = Proceed**  
33  
34

35 234 Proceed with whatever you were doing before you came to a STOP or something that you want  
36  
37 235 to do in the moment (e.g. proceed with touching your face, or stop face-touching and take an  
38  
39 236 alternative behavior).  
40

41  
42 237 The STOP Practice is very short, simple, and the acronym (STOP) makes it easy to remember as  
43  
44 238 well. Thus, it has become one of the most popular mindfulness-based practices. The practice of  
45  
46 239 STOP may cultivate a space between stimulus and response, which could help avoid the mostly  
47  
48 240 spontaneous behavior of facial self-touching. The “STOP touching your face” training program in  
49  
50 241 Chinese was already developed by Dr. Y Liao, Dr. Q Luo and Dr. C Pan. Both 750-word text and 5-  
51  
52 242 min audio description (see **Supplementary file 1**) will be available by online.  
53  
54  
55  
56  
57

## 243 **Procedures**

244 After advertising, participants who are interested in this study will be assessed for eligibility by  
245 making a call or communicating with social media (mainly WeChat). Then, eligible participants  
246 will sign a e-consent form (**Supplementary file 2**), and complete baseline information and the  
247 first self-monitoring of frequency of face-touching in a 60-minute period by online. Afterwards,  
248 participants will receive a brief mindfulness-based “STOP touching your face” intervention or  
249 control intervention. For both groups, the second self-monitoring of frequency of face-touching  
250 behavior will be taken at least 1 hour apart from the first one. The schedule of study procedures  
251 summarizes in **Figure 1**. The details of the procedure will include the following 3 steps:

252

### 253 ***Step 1. The first self-monitoring of face-touching behavior (before intervention)***

254 In order to measure the changes of face-touching behavior before and after intervention, all  
255 eligible participants will receive the instruction (in Chinese) of how to self-monitored and  
256 reported the frequency of face-touching in any of the mucosal area (eyes, nose, mouth) and  
257 nonmucosal area (ears, cheeks, chin, neck, forehead, hair) during a 60-minute period. All  
258 participants will be required to monitor their face-touching behavior during a 60-minute period,  
259 and be encouraged to do it in a manageable situation. Wearing facial mask will not be permitted  
260 during the time of self-monitoring face-touching. All participants will be provided with the same  
261 link to complete their baseline information and the first self-monitoring of face-touching  
262 behavior, and be encouraged to complete this questionnaire immediately after completion of  
263 self-monitoring.

1  
2  
3 264 Instruction: *"1. Please find a convenient time, no need to deliberately change your routine life*  
4  
5  
6 265 *(such as working or studying at the desk, watching TV), observe and record how many times you*  
7  
8 266 *touched your hair, forehead, eyes, nose, mouth, ears, cheeks , Chin and neck in one-hour period*  
9  
10 267 *(if you touched your mouth and nose at one time, you should count one time for mouth-touching*  
11  
12  
13 268 *and one time for nose-touching). If there is any information that you cannot understand, please*  
14  
15 269 *contact with me at any time; 2. fill in the following content immediately after completion of self-*  
16  
17  
18 270 *monitoring (with a link to "hand-to-face contacts" behavior monitoring record 1); 3. please*  
19  
20 271 *contact with me to send the information about intervention to you when you completed the link.*  
21  
22  
23 272 *4. You will repeat another one-hour period self-monitoring after your receiving another*  
24  
25 273 *information (either "STOP touching your face" program or just thanks words)."*  
26  
27  
28 274  
29

## 30 275 **Step 2. Intervention**

31  
32 276 **The intervention group:** Participants from the intervention group will receive the online  
33  
34  
35 277 mindfulness-based "STOP touching your face" program (both 750-word text and 5-min audio  
36  
37 278 description). Each participant will be required to read the text of the program first and then listen  
38  
39  
40 279 to the audio. They will be encouraged to practice this technique until they feel confident and  
41  
42 280 natural. The systematic review showed the efficacy of single session of brief MBIs, the average  
43  
44  
45 281 length of which was 15 minutes, ranged from less than 5 to 25 min<sup>25</sup>. Thus, the requirement  
46  
47 282 practice time will be at least 15 minutes (excluding the time of reading the text and the first time  
48  
49  
50 283 of listening to the audio). This online mindfulness-based intervention will not have face-to-face  
51  
52 284 interaction between the experimenter and participants throughout the entire study.

53  
54 285 **The control group:** Participants who allocate to the control group will only receive information  
55  
56  
57

1  
2  
3 286 to thank them and encourage them to complete the study. They will be reminded to receive  
4  
5  
6 287 “STOP touching your face” program after the end of this study.  
7

8 288 **Both groups:** Participants from both groups will be reminded to contact with us to provide the  
9  
10 289 instruction of another self-monitoring behavior of face-touching.  
11  
12

13 290

14  
15 291 ***Step 3. The second self-monitoring of face-touching behavior (after intervention)***  
16

17  
18 292 After intervention, all participants will be required to monitor their face-touching behavior during  
19  
20 293 a 60-minute period again. When participants tell us “*I am ready to do another self-monitoring*”,  
21  
22 294 they will receive instruction of how to complete the second self-monitoring of face-touching  
23  
24  
25 295 behavior during a 60-minute period. The repeat measurement of the face-touching behavior will  
26  
27  
28 296 be done at least 1 hour apart from the first self-monitoring. All participants will be encouraged  
29  
30 297 to monitor their face-touching behavior in two similar situations.  
31

32 298 Instruction: “*1. Again, please find a convenient time, no need to deliberately change your routine*  
33  
34 299 *life (such as working or studying at the desk, watching TV), observe and record how many times*  
35  
36 300 *you touched your hair, forehead, eyes, nose, mouth, ears, cheeks , Chin and neck in one-hour*  
37  
38 301 *period (if you touched your mouth and nose at one time, you should count one time for mouth-*  
39  
40 302 *touching and one time for nose-touching). It is better to find a similar situation (the similar time*  
41  
42 303 *if not in the same day, same place, and when you are doing the same thing). You need to do it at*  
43  
44 304 *least 1 hour apart from the last observation. If there is any information that you cannot*  
45  
46 305 *understand, please contact with me at any time; 2. fill in the following content immediately after*  
47  
48 306 *completing self-monitoring (with a link to "hand-to-face contacts" behavior monitoring record 2,*  
49  
50 307 *the two groups will receive different links); 3. please let me known when you completed the link*  
51  
52  
53  
54  
55  
56  
57  
58  
59  
60

1  
2  
3 308 *(the intervention group); please contact with me to send the program to you when you completed*  
4  
5  
6 309 *the link (the control group)."*  
7

8 310  
9  
10 311 All participants will be thanked and encouraged to practice "STOP touching your face" regularly  
11  
12 312 after the end of the study. All outcomes will be collected by an online survey through the Chinese  
13  
14 313 professional survey software WenJuanXing (Sojump, Shanghai, China, [www.sojump.com](http://www.sojump.com)). For  
15  
16 314 non-responders, a reminding message will be sent to them by their provided contact information  
17  
18 315 for reporting the outcomes.  
19  
20  
21  
22  
23 316

## 24 25 317 **Outcomes**

26  
27 318 **Primary outcome:** the efficacy of short-term mindfulness-based "STOP touching your face"  
28  
29 319 intervention ( $\geq 15$ min) for reducing face-touching behavior, measuring by reduction of  
30  
31 320 percentage of the T-Zone touching during a 60-minute period by intervention.  
32  
33

34  
35 321 **Secondary outcomes:** the reduction of the frequency of face-touching after intervention; the  
36  
37 322 factors (demographic characteristics, psychological traits of mindfulness) that would be  
38  
39 323 associated with reduction of frequency of face-touching; the differences of face-touching  
40  
41 324 behavior between left-handers and right-handers.  
42  
43  
44

45 325

## 46 47 326 **Measures**

48  
49 327 **1. Frequency of face-touching:** Self-observation or self-monitoring of face-touching behavior will  
50  
51 328 be required to report from each participant. A standardized scoring sheet will be provided to tally  
52  
53 329 the frequency of hand-to-face contacts, the touched area of the face, including the mucosal area  
54  
55  
56  
57



330 (eyes, nose, mouth) and nonmucosal area (ears, cheeks, chin, neck, forehead, hair) , and the  
331 time in seconds of each contact will be recorded in a 60-minute period <sup>4</sup>.

332 **2. Reduction of frequency of face-touching behavior:** this will be calculated as the total times of  
333 face-touching (including the eyes, nose, mouth, ears, cheeks, chin, neck, forehead, hair) during a  
334 60-minute period before the intervention minus the total times of face-touching after the  
335 intervention.

336 **3. Five Facet Mindfulness Questionnaire (FFMQ)**<sup>32-34</sup>: this self-report scale is currently the most  
337 frequently used mindfulness questionnaire to measure changes in participant's tendency to be  
338 mindful in daily life by the following five related facets: observing(noticing, attending to  
339 sensations, perceptions, thoughts, feelings; 8 items), describing (labeling feelings, thoughts with  
340 words), acting with awareness (automatic pilot, concentration, non-distraction), non-judging  
341 internal experience, and non-reactivity to internal experience. Participants will be asked to what  
342 extent each of the statements are true of them. Each item is on a 1 to 5 Likert scale, ranging from  
343 1 (never or very rarely true) to 5 (very often or always true). The scores represent a spectrum of  
344 mindfulness with no cut-off points, higher scores indicate higher levels of mindfulness. The  
345 factor structure of the short version (FFMQ-15) will be used in this study, which has been  
346 consistent with that of the FFMQ-39<sup>35</sup>.

347 **4. The Edinburgh Handedness Inventory (EHI)** <sup>36 37</sup>: EHI is the most widely used 10-item self-  
348 report inventory to assess handedness. It is comprised of the following 10 activities: (1) writing,  
349 (2) drawing, (3) throwing, (4) using scissors, (5) a toothbrush (6) knife (without fork), (7) spoon,  
350 and such activities involving both hands as (8) using a broom (upper hand), (9) striking a match,  
351 and (10) unscrewing the lid of a bottle. To complete the EHI, one or two check marks are placed

1  
2  
3 352 under “left (L)” or “right (R)” columns, indicating strength of preference for each activity.  
4  
5  
6 353 Participants will be asked write “2”, “1” or “0” in the appropriate corresponding column. If the  
7  
8 354 preference is very strong that they would never try to use the other hand unless absolutely forced  
9  
10 355 to, then they will mark this column as “2” and the other column as “0”. If they are really  
11  
12 356 indifferent, they will mark it as “1” in both columns. A laterality quotient ( $LQ = R - L / R + L \times 100$ )  
13  
14 357 can be calculated, where a score of 100 reflects complete right-handedness, and a score of -100  
15  
16 358 reflects complete left-handedness.  
17  
18  
19  
20  
21 359

### 22 360 **Withdrawal from the Program**

23  
24  
25 361 Every participant will feel free to withdraw from the study at any time and without giving any  
26  
27 362 reason. On the basis of the intention-to-treat (ITT) principle<sup>38</sup>, participants who fail to respond to  
28  
29 363 follow-up assessment will be retained in the analysis and classified as those who continued the  
30  
31 364 same behavior. Only participants who request withdrawal from the study will be excluded from  
32  
33 365 the analysis, and reasons for withdrawal will be noted if they are available. However, self-  
34  
35 366 monitoring itself may increase the awareness of face-touching behavior, then consequently  
36  
37 367 increase or decrease the frequency of face-touching behavior in the second time of observation.  
38  
39 368 Alternatively, a complete case analysis will also be performed in which any participant withdrew  
40  
41 369 from the study in the second observation will be excluded.  
42  
43  
44  
45  
46  
47  
48

### 49 371 **Data collection**

50  
51  
52 372 Data will be collected on line by WenJuanXing, a Chinese online market research Web site that  
53  
54 373 provides professional online questionnaire survey or data collection for RCTs<sup>39</sup>. Data will be  
55  
56  
57  
58  
59  
60

1  
2  
3 374 monitored by data monitoring committee of the hospital. Personal data will be de-identified.  
4  
5

6 375  
7

8 376 **Data analysis**  
9

10 377 All data will be automatically collected by internet. A user-specified Excel file will be downloaded  
11

12  
13 378 from the database. There will be no interim analyses. When all data have been obtained, they  
14

15 379 will be analyzed and blinded to intervention assignment by the trial statistician using R software  
16

17  
18 380 (R Foundation for Statistical Computing, Vienna, Austria. <https://www.r-project.org/>) and SPSS  
19

20 381 (IBM Corp. Released 2013. IBM SPSS Statistics for Windows, Version 22.0. Armonk, NY: IBM Corp.).  
21

22  
23 382 Descriptive statistics will be applied for demographic and face-touching-related characteristics at  
24

25 383 baseline; two sample T-test or Mann-Whitney U test (for continuous variables) and  $\chi^2$  test (for  
26

27  
28 384 categorical variables) will be applied to compare the demographic information and face-touching  
29

30 385 behavior at baseline between the STOP intervention group and control group. Percentage of  
31

32 386 touching the T-Zone participants between pre- and post- intervention in the STOP group and the  
33

34  
35 387 control group will be compared by  $\chi^2$  test. In order to determine if the "STOP touching your face"  
36

37 388 intervention group showed a reduction of face-touching behavior than the control group, two  
38

39  
40 389 sample T-test or Mann-Whitney U test will first be applied to compared group differences in  
41

42 390 reduction of the frequency of face-touching. Then, analysis of covariance (ANCOVA) will be  
43

44  
45 391 applied with controlling for demographic information (such age, handedness and prior  
46

47 392 mindfulness meditation experience). In ANCOVA model, the dependent variable will be the  
48

49  
50 393 reduction of face-touching behavior. The pre-intervention measure of the total times of face-  
51

52 394 touching will be controlled as a covariate, and intervention will be a fix factor. This model will  
53

54  
55 395 assess the differences in the post-intervention means after accounting for pre-intervention  
56  
57  
58  
59  
60

1  
2  
3 396 values; Pearson's correlations or regression analysis (linear and binary regression model) will be  
4  
5  
6 397 used to explore the any factor that associated with face-touching behavior at baseline and  
7  
8 398 reduction of face-touching behavior in the intervention group and in the control group. Intention-  
9  
10 399 to-treat (ITT) basis will be applied in this study to handle incomplete or missing data (assuming  
11  
12  
13 400 for no reduction of the frequency of face-touching). In addition, a complete case analysis will be  
14  
15 401 performed in which any participant with missing information on the follow-up will be  
16  
17  
18 402 excluded. All tests will be 2-tailed. A two-sided  $P < 0.05$  will be used to determine statistical  
19  
20 403 significance.  
21  
22  
23 404

#### 24 25 405 **Safety**

26  
27 406 Throughout the “STOP touching your face” program, participants will be encouraged to  
28  
29  
30 407 communicate with us if they experience any mindfulness practice relative issues. Adverse events  
31  
32  
33 408 will be monitored during the study. The MBIs are regarded as relatively safe interventions<sup>40</sup>.  
34  
35 409 Research showed that even highly vulnerable participants (such as patients with major  
36  
37 410 depressive disorder<sup>41</sup>) can safely practice mindfulness, but if participants experience any health-  
38  
39  
40 411 related issues, they will be encouraged to contact with us, or we will refer a health care provider.  
41  
42 412 This study is not clinical-facilitated and may have very low risk of any safety issue. We will send a  
43  
44  
45 413 message to each participant to check whether they have any safety issues after providing them  
46  
47 414 with intervention instruction.  
48  
49  
50 415

#### 51 52 416 **Ethics and dissemination**

1  
2  
3 417 The study protocol has been approved by The Ethics Committee of Sir Run Run Shaw hospital, an  
4  
5  
6 418 affiliate of Zhejiang University, Medical College (NO. 20200401-32). All activities associated with  
7  
8 419 this protocol will be conducted in full compliance with the approved policies and procedures.  
9  
10 420 Electronically Informed consent (this e-consent is a form of written consent) will be  
11  
12 421 communicated and obtained from each participant prior to participation. All participant will be  
13  
14  
15 422 explained about the purpose, procedures and assessments, potential risks and benefits of the  
16  
17 423 trial before recruitment. After fully understanding the study, participants will be informed that  
18  
19 424 their participation in this research study is total voluntary. They can choose to (sign the  
20  
21 425 electronic consent form by selecting “agree to participant”) or not to participate (sign the  
22  
23 426 electronic consent form by selecting “disagree to participant”). Participation can withdrawal at  
24  
25  
26  
27 427 any time without reasons. Contact information (phone number and social media contact like  
28  
29 428 WeChat contact ID) of the study coordinator for any future questions and concerns will be  
30  
31  
32 429 provided and informed to each participant. We will recruit 1000 participants from April to July  
33  
34 430 2020 or until the recruitment process is complete. The follow-up will be completed in July 2020.  
35  
36  
37 431 We expect all trial results to be available by the end of July 2020. Any results from this trial  
38  
39 432 (publications, conference presentations) will be disseminated via social media and be published  
40  
41 433 in peer-reviewed journals and conference proceedings.  
42  
43  
44  
45 434

## 47 435 **Discussion**

46  
47  
48  
49  
50 436 This RCT is to investigate the efficacy of brief mindfulness-based intervention of “STOP touching  
51  
52 437 your face” for people from general population in China. To our knowledge, this will be the first  
53  
54  
55  
56  
57  
58  
59  
60

1  
2  
3 438 RCT to evaluate the efficacy of brief mindfulness intervention to reduce face-touching behavior  
4  
5  
6 439 on the basis of mindfulness and cognitive behavioral principles.  
7

8 440  
9  
10 441 The strength of this study is that this is a theoretical framework guided (mindfulness-based  
11  
12 442 cognitive behavior theory) large sample size RCT to evaluate the efficacy of “STOP touching your  
13  
14 443 face” during the outbreak of COVID-19. If “STOP touching your face” program is proved to be  
15  
16 444 effective, it opens up its potential application worldwide at the population level. As “STOP  
17  
18 445 touching your face” program is a free, brief, simple and widely accessible mindfulness-based  
19  
20 446 behavior change intervention, the public health impact of its expansion world-wide could be  
21  
22 447 enormous, helping us to manage any face-touching spread infectious diseases, like COVID-19.  
23  
24  
25  
26  
27

28 448  
29  
30 449 There are some limitations in this study. First, there is no digital videotape recording for the  
31  
32 450 behavior of face-touching by researchers. Alternatively, it will be self-monitored. Self-monitoring  
33  
34 451 of physical (such as blood pressure), and mental health (such as anger or frustration that comes  
35  
36 452 from daily life) has been used as a strategy for improving the treatment of a number of chronic  
37  
38 453 conditions or reducing unhealth behaviors including smoking, drinking, gambling and so on<sup>42</sup>.  
39  
40 454 Thus, self-monitoring itself may change participants face-touching behavior by creating a more  
41  
42 455 active role in observing this behavior. Also, self-reported results of self-monitored times of face  
43  
44 456 touching may be overestimated or underestimated. The results will be more accurate under lab  
45  
46 457 conditions. In order to reduce the bias, we will invite a sub-group of participants with video  
47  
48 458 record by another person to confirm the consistency of these results. Second, this is only an  
49  
50 459 online intervention, participants may be more likely to drop out from the study. Thus, we will  
51  
52  
53  
54  
55  
56  
57  
58  
59  
60

1  
2  
3 460 encourage participants contact with us if they have any questions or concerns. We will also apply  
4  
5  
6 461 an intention-to-treat principle to prevent potential bias caused by missing data from loss to  
7  
8 462 follow-up, as well as a complete case analysis. Third, this is only a brief intervention by internet.  
9  
10 463 A face to face long-term mindfulness intervention will help participants gain the maximum  
11  
12  
13 464 benefits of practice. However, neuroimaging study demonstrates that both long and short-term  
14  
15 465 mindfulness practice can improve automatic emotion regulation<sup>43</sup>, and RCT shows that brief  
16  
17  
18 466 online mindfulness-based intervention can also increase mindfulness and decrease perceived  
19  
20 467 stress and symptoms of anxiety or depression<sup>27</sup>. Last, this is a mindfulness-based intervention,  
21  
22  
23 468 and mindfulness could make participants better at catching themselves touching their faces, so  
24  
25 469 participants from the intervention group may report higher frequency than the control group in  
26  
27  
28 470 the second self-monitoring of face-touching behavior.

29  
30 471  
31  
32 472 In conclusion, this is the first RCT to evaluate the efficacy of brief mindfulness intervention to  
33  
34  
35 473 reduce face-touching behavior. If “STOP touching your face”, a brief and simple skill, is proven  
36  
37  
38 474 effective, the public health impact of its expansion world-wide could be enormous, its  
39  
40 475 dissemination will help us to manage any face-touching spread infectious diseases, like  
41  
42 476 Coronavirus disease 2019 (COVID-19).  
43  
44

45 477

#### 47 478 **Availability of data and materials**

49 479 All data in the current study will be available from the corresponding author on reasonable  
50  
51  
52 480 request and with completion of data user agreement.  
53

54 481  
55  
56  
57  
58  
59  
60

## 482 **Authors' Contributions**

483 YLiao and JT developed and designed the study. Yliao, CP and QL developed the “STOP touching  
484 your face” training program. Yliao discussed with LW and WC on the planning and conduct of the  
485 study, and discussed with YLiu and JT on the acquisition of data and the planning of data analysis.  
486 YLiao took the lead in drafting the manuscript protocol with contributions by JT and JC. TL, SW,  
487 ZW, YW, XG, LX and JZ advised the study design, and coordinated study approval. All authors read  
488 and proposed critical comments, as well as approved the manuscript for publication.

## 490 **Funding**

491 The research is supported by Zhejiang University special scientific research fund for COVID-19  
492 prevention and control (2020XGZX046), the “Hundred Talents Program” funding from Zhejiang  
493 University, and the K.C. Wong Postdoctoral Fellowship to study at King's College London (KCL).  
494 The funders had no role in study design, data collection and analysis, decision to write the report  
495 or to submit the paper for publication.

## 497 **Competing interests statement**

498 No potential conflicts of interest to declare.

## 500 **Acknowledgements**

501 Dr. Y Liao would like to thank Professor Ann McNeill from KCL for her suggestions and thank 5P  
502 Medicine (5P Yixue APP) for providing STOP audio description (see supplementary file). Dr. Y Liao,  
503 Dr. C Pan and Dr. Q Luo would like to thank the UCLA (the University of California at Los Angeles)



1  
2  
3 504 Mindful Awareness Research Center for providing opportunities to them to learn and practice  
4  
5  
6 505 mindfulness.

7  
8 506

9  
10  
11 507 **References**

- 12  
13 508 1. Harrigan JA, Kues JR, Weber JG. Impressions of hand movements: Self-touching and gestures.  
14 509 *Perceptual and motor skills* 1986;63(2):503-16.  
15 510 2. Krout MH. Autistic gestures: An experimental study in symbolic movement. *Psychological*  
16 511 *Monographs* 1935;46(4):i.  
17 512 3. Nicas M, Best D. A study quantifying the hand-to-face contact rate and its potential application to  
18 513 predicting respiratory tract infection. *Journal of occupational and environmental hygiene*  
19 514 2008;5(6):347-52.  
20 515 4. Kwok YLA, Gralton J, McLaws M-L. Face touching: A frequent habit that has implications for hand  
21 516 hygiene. *American journal of infection control* 2015;43(2):112-14.  
22 517 5. Dimond S, Harries R. Face touching in monkeys, apes and man: Evolutionary origins and cerebral  
23 518 asymmetry. *Neuropsychologia* 1984;22(2):227-33.  
24 519 6. Measurement of Face-touching Frequency in a Simulated Train. E3S Web of Conferences; 2019. EDP  
25 520 Sciences.  
26 521 7. Elder NC, Sawyer W, Pallerla H, et al. Hand hygiene and face touching in family medicine offices: a  
27 522 Cincinnati Area Research and Improvement Group (CARInG) network study. *The Journal of the*  
28 523 *American Board of Family Medicine* 2014;27(3):339-46.  
29 524 8. Huang C, Wang Y, Li X, et al. Clinical features of patients infected with 2019 novel coronavirus in  
30 525 Wuhan, China. *The Lancet* 2020;395(10223):497-506.  
31 526 9. Ong SWX, Tan YK, Chia PY, et al. Air, surface environmental, and personal protective equipment  
32 527 contamination by severe acute respiratory syndrome coronavirus 2 (SARS-CoV-2) from a  
33 528 symptomatic patient. *Jama* 2020  
34 529 10. Mueller SM, Martin S, Grunwald M. Self-touch: Contact durations and point of touch of spontaneous  
35 530 facial self-touches differ depending on cognitive and emotional load. *PloS one* 2019;14(3)  
36 531 11. Grunwald M, Weiss T, Mueller S, et al. EEG changes caused by spontaneous facial self-touch may  
37 532 represent emotion regulating processes and working memory maintenance. *brain research*  
38 533 2014;1557:111-26.  
39 534 12. Harrigan JA. Self-touching as an indicator of underlying affect and language processes. *Social science*  
40 535 *& medicine* 1985;20(11):1161-68.  
41 536 13. Kabat-Zinn J. Mindfulness-based interventions in context: past, present, and future. *Clinical*  
42 537 *psychology: Science and practice* 2003;10(2):144-56.  
43 538 14. Cavicchioli M, Movalli M, Maffei C. The Clinical Efficacy of Mindfulness-Based Treatments for Alcohol  
44 539 and Drugs Use Disorders: A Meta-Analytic Review of Randomized and Nonrandomized  
45 540 Controlled Trials. *European addiction research* 2018;24(3):137-62. doi: 10.1159/000490762  
46 541 [published Online First: 2018/07/18]  
47 542 15. Sancho M, De Gracia M, Rodríguez RC, et al. Mindfulness-based interventions for the treatment of  
48 543 substance and behavioral addictions: a systematic review. *Frontiers in psychiatry* 2018;9:95.  
49 544 16. Kamboj SK, Irez D, Serfaty S, et al. Ultra-Brief Mindfulness Training Reduces Alcohol Consumption in  
50 545 At-Risk Drinkers: A Randomized Double-Blind Active-Controlled Experiment. *International*  
51 546 *Journal of Neuropsychopharmacology* 2017;20(11):936-47. doi: 10.1093/ijnp/pyx064

17. Haydicky J, Wiener J, Badali P, et al. Evaluation of a mindfulness-based intervention for adolescents with learning disabilities and co-occurring ADHD and anxiety. *Mindfulness* 2012;3(2):151-64.
18. Kristeller JL, Wolever RQ. Mindfulness-based eating awareness training for treating binge eating disorder: the conceptual foundation. *Eating disorders* 2010;19(1):49-61.
19. Wanden-Berghe RG, Sanz-Valero J, Wanden-Berghe C. The application of mindfulness to eating disorders treatment: a systematic review. *Eating disorders* 2010;19(1):34-48.
20. Xu W, Jia K, Liu X, et al. The effects of mindfulness training on emotional health in Chinese long-term male prison inmates. *Mindfulness* 2016;7(5):1044-51.
21. Shonin E, Van Gordon W, Griffiths M. Mindfulness-based interventions: Towards mindful clinical integration. *Frontiers in Psychology* 2013;4:194.
22. Carmody J, Baer RA. Relationships between mindfulness practice and levels of mindfulness, medical and psychological symptoms and well-being in a mindfulness-based stress reduction program. *Journal of behavioral medicine* 2008;31(1):23-33.
23. Grossman P, Niemann L, Schmidt S, et al. Mindfulness-based stress reduction and health benefits: A meta-analysis. *Journal of psychosomatic research* 2004;57(1):35-43.
24. Segal ZV, Teasdale J. Mindfulness-based cognitive therapy for depression: Guilford Publications 2018.
25. Howarth A, Smith JG, Perkins-Porras L, et al. Effects of Brief Mindfulness-Based Interventions on Health-Related Outcomes: a Systematic Review. *Mindfulness* 2019:1-12.
26. Chen Y, Yang X, Wang L, et al. A randomized controlled trial of the effects of brief mindfulness meditation on anxiety symptoms and systolic blood pressure in Chinese nursing students. *Nurse education today* 2013;33(10):1166-72.
27. Cavanagh K, Strauss C, Cicconi F, et al. A randomised controlled trial of a brief online mindfulness-based intervention. *Behaviour research and therapy* 2013;51(9):573-78.
28. Howells A, Ivtzan I, Eiroa-Orosa FJ. Putting the 'app' in happiness: a randomised controlled trial of a smartphone-based mindfulness intervention to enhance wellbeing. *Journal of Happiness Studies* 2016;17(1):163-85.
29. Garrison KA, Pal P, O'Malley SS, et al. Craving to quit: a randomized controlled trial of smartphone app-based mindfulness training for smoking cessation. *Nicotine and Tobacco Research* 2020;22(3):324-31.
30. Buntrock C, Ebert DD, Lehr D, et al. Effect of a web-based guided self-help intervention for prevention of major depression in adults with subthreshold depression: a randomized clinical trial. *Jama* 2016;315(17):1854-63.
31. Smalley SL, Winston D. Fully present: The science, art, and practice of mindfulness: Da Capo Lifelong Books 2010.
32. Deng Y-Q, Liu X-H, Rodriguez MA, et al. The five facet mindfulness questionnaire: psychometric properties of the Chinese version. *Mindfulness* 2011;2(2):123-28.
33. de Bruin EI, Topper M, Muskens JG, et al. Psychometric properties of the Five Facets Mindfulness Questionnaire (FFMQ) in a meditating and a non-meditating sample. *Assessment* 2012;19(2):187-97.
34. Baer RA, Smith GT, Hopkins J, et al. Using self-report assessment methods to explore facets of mindfulness. *Assessment* 2006;13(1):27-45.
35. Gu J, Strauss C, Crane C, et al. Examining the factor structure of the 39-item and 15-item versions of the Five Facet Mindfulness Questionnaire before and after mindfulness-based cognitive therapy for people with recurrent depression. *Psychological assessment* 2016;28(7):791.
36. Yang N, Waddington G, Adams R, et al. Translation, cultural adaptation, and test-retest reliability of Chinese versions of the Edinburgh Handedness Inventory and Waterloo Footedness Questionnaire. *Laterality: Asymmetries of Body, Brain and Cognition* 2018;23(3):255-73.

- 1  
2  
3 595 37. Oldfield RC. The assessment and analysis of handedness: the Edinburgh inventory. *Neuropsychologia*  
4 596 1971;9(1):97-113.  
5 597 38. Montori VM, Guyatt GH. Intention-to-treat principle. *Cmaj* 2001;165(10):1339-41.  
6 598 39. Fitzpatrick T, Zhou K, Cheng Y, et al. A crowdsourced intervention to promote hepatitis B and C  
7 599 testing among men who have sex with men in China: study protocol for a nationwide online  
8 600 randomized controlled trial. *BMC infectious diseases* 2018;18(1):489.  
9 601 40. Wong SY, Chan JY, Zhang D, et al. The safety of mindfulness-based interventions: a systematic review  
10 602 of randomized controlled trials. *Mindfulness* 2018;9(5):1344-57.  
11 603 41. Piet J, Hougaard E. The effect of mindfulness-based cognitive therapy for prevention of relapse in  
12 604 recurrent major depressive disorder: a systematic review and meta-analysis. *Clinical psychology*  
13 605 *review* 2011;31(6):1032-40.  
14 606 42. Kim JY, Wineinger NE, Steinhubl SR. The influence of wireless self-monitoring program on the  
15 607 relationship between patient activation and health behaviors, medication adherence, and blood  
16 608 pressure levels in hypertensive patients: a substudy of a randomized controlled trial. *Journal of*  
17 609 *medical Internet research* 2016;18(6):e116.  
18 610 43. Kral TR, Schuyler BS, Mumford JA, et al. Impact of short-and long-term mindfulness meditation  
19 611 training on amygdala reactivity to emotional stimuli. *Neuroimage* 2018;181:301-13.  
20  
21  
22  
23 612  
24  
25  
26  
27  
28  
29  
30  
31  
32  
33  
34  
35  
36  
37  
38  
39  
40  
41  
42  
43  
44  
45  
46  
47  
48  
49  
50  
51  
52  
53  
54  
55  
56  
57  
58  
59  
60

1  
2  
3 613 **Figure Legend**

4 614

5  
6 615 **Figure 1** Study Flow Diagram

7  
8 616

9  
10 617

11  
12 618

13  
14 619

15  
16 620 **Note:** Participants from the “control” intervention will receive “STOP touching your face”  
17 621 intervention (both text and audio description) immediately after completing the second self-  
18 622 monitoring face-touching behavior. But they will not be required to practice it or to practice it  
19 623 at least 15 minutes.  
20  
21  
22  
23  
24  
25  
26  
27  
28  
29  
30  
31  
32  
33  
34  
35  
36  
37  
38  
39  
40  
41  
42  
43  
44  
45  
46  
47  
48  
49  
50  
51  
52  
53  
54  
55  
56  
57  
58  
59  
60

1  
2  
3 **625 Table1** study inclusion and exclusion criteria

---

4 Inclusion Criteria:

- 5  
6 1. 18 years of age or older  
7 2. Being able to access online services  
8 3. Being able to read and write in Chinese  
9 4. Expressing an interest in participant this study  
10 5. Willing to provide informed consent to participate in the study

11 Exclusion Criteria:

- 12  
13 1. Under 18 years of age  
14 2. Unable to access online services  
15 3. Unable to read and write in Chinese  
16 4. Already received “not to touch your face” training
- 

17  
18 **626**

Figure 1

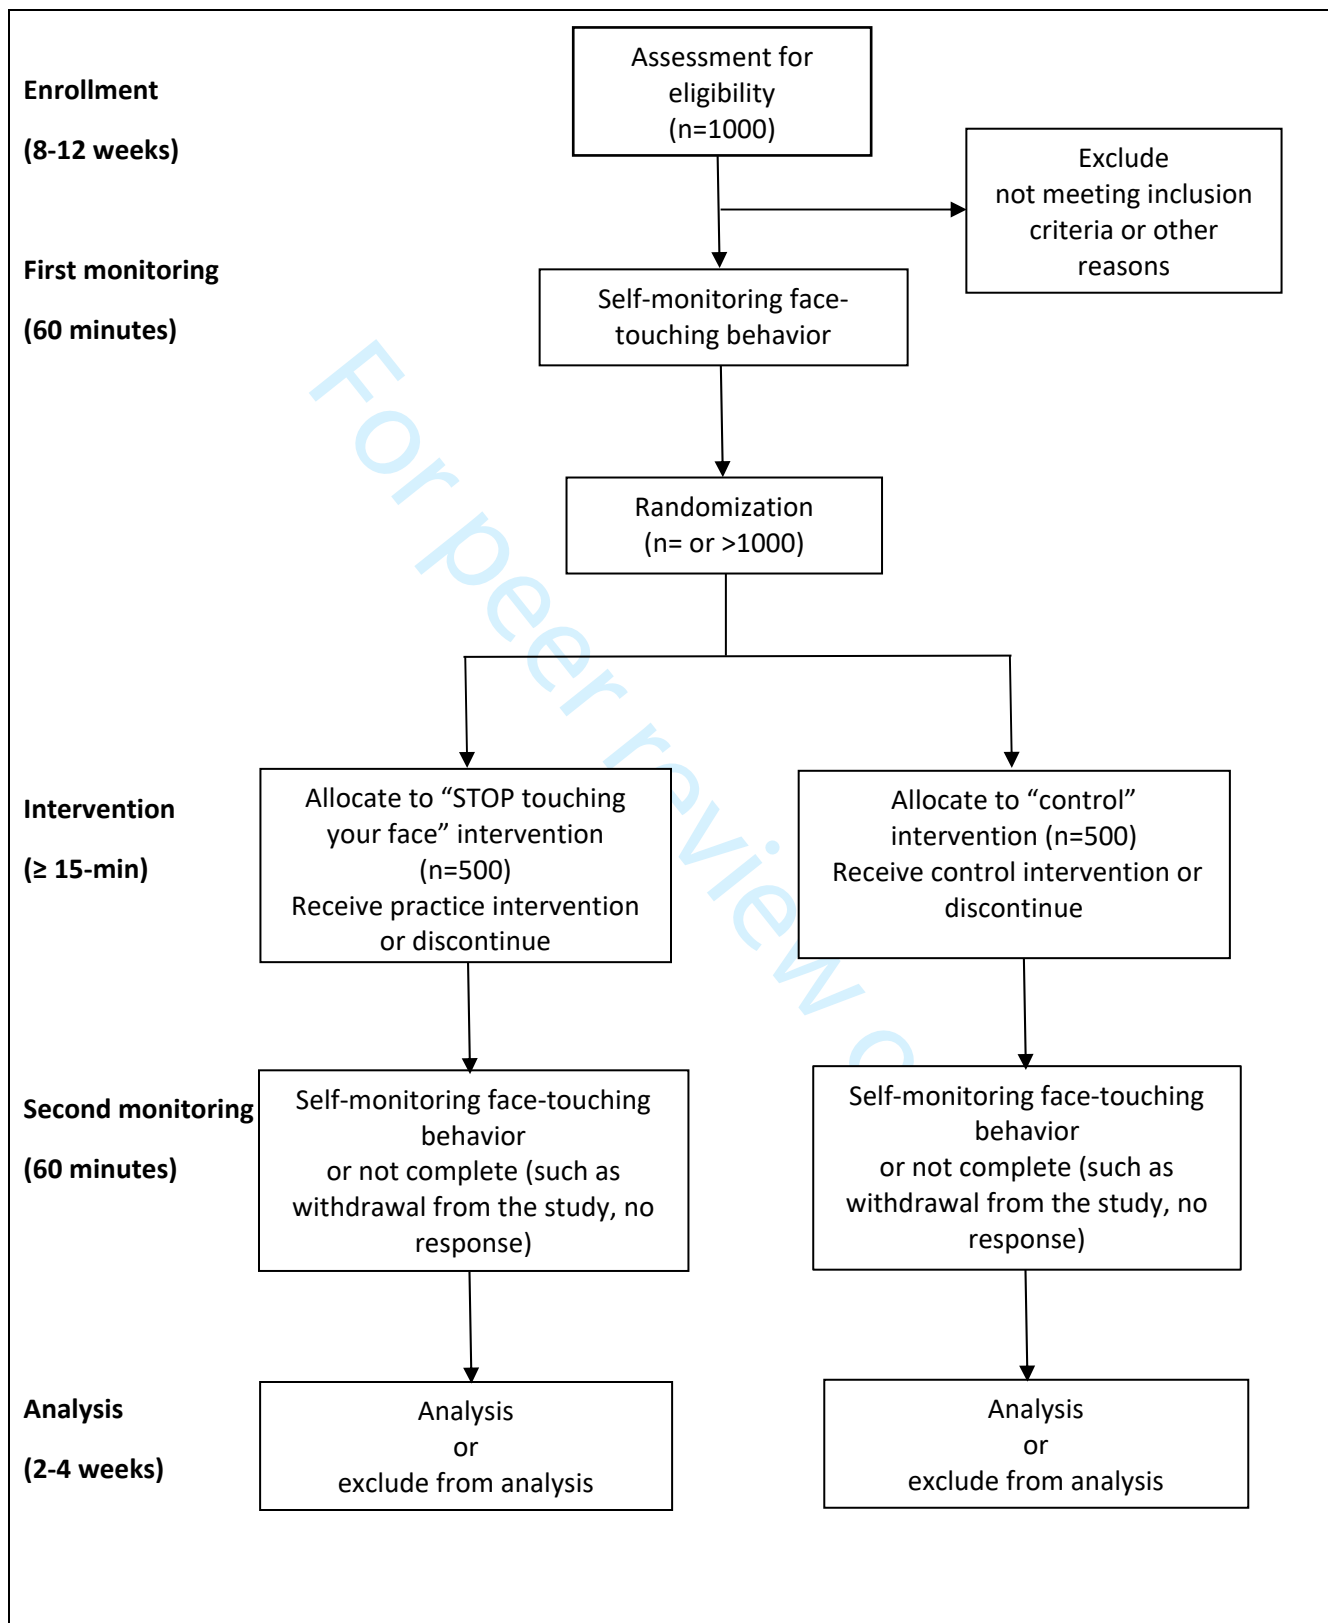

### Informed consent

**Program name:** A brief mindfulness-based intervention of “STOP (Stop, Take a Breath, Observe, Proceed) touching your face”: a randomized controlled trial

**Informed Consent Version Number:** 1.0, Date: March 23, 2020

**Primary Investigator:** Liao, Yanhui

#### 1. Invitation to participate in this research:

You will be invited to participate in a clinical study. This informed consent form provides you with some information to help you decide whether to participate in this clinical study or not. Please read it carefully. If you have any questions, please ask the researcher who is in charge of the study. Your participation in this study is totally voluntary. This study has been reviewed and approved by The Ethics Committee of Sir Run Run Shaw hospital, an affiliate of Zhejiang University, Medical College (NO. 20200401-32).

#### 2. What kind of research is this?

**Research purpose:** Behaviour changes are very important for disease prevention, such as changing smoking behaviour to non-smoking behaviour, and using a pen tip to touch elevator buttons during the new coronavirus epidemic. However, many people touch their faces unconsciously. Avoiding this behaviour is an important way to prevent new coronavirus infections, especially for people in areas where there is a lack of masks (masks can also help people reduce touching their mouth and nose). The STOP technique of mindfulness intervention was originally a simple and effective way to relieve stress and anxiety. By practicing the simple technique of STOP, it may help us avoid touching our faces.

The main purpose of this study is to evaluate an online mindfulness-based brief intervention skill named “STOP (Stop, Take a Breath, Observe, Proceed) touching your face” in reducing face-touching behaviour.

**Research process and duration:** The research process lasts at least more than 2 hours.

**Research method and content:** This randomized controlled trial (RCT) will enroll 1,000 healthy volunteers, and randomly assign subjects to a brief mindfulness intervention or control group at a ratio of 1:1. You need to find a convenient time, no need to deliberately change your life and work plan, you still can work and study. Prepare a paper and pen, or a recorder, then observe and record the number of times you touch your hair, forehead, eyes, nose, mouth, ears, cheeks, chin, and neck within 1 hour, and the time (seconds) of each touch. The intervention group will receive mindfulness-based STOP technology, and observe and record face touching again after practice it. The control group received control information of reminding them to observe and record face touching again. As part of the research, your interview information will be stored in Sir Run Run Shaw hospital of Zhejiang University School of Medicine for analysis or shared with other qualified researchers for research purposes. During the research process, we will use a unified standardized code to encode your private personal information, etc., and we will protect your information in accordance with relevant laws and regulations. If you are assigned to the control group, we will send you the STOP technique that received by the intervention group for free after the study.

**Funding sources and possible conflicts of interest for the trial:** The research plan was

designed by Dr, Yanhui Liao from Department of Psychiatry, Sir Run Run Shaw Hospital, School of Medicine, Zhejiang University, supported by Zhejiang University special scientific research fund for COVID-19 prevention and control (2020XGZX046).

**Alternative therapies outside of this trial:** Participation in this research is completely voluntary. You can refuse to participate in the research or opt out of the research at any time during the research process without any reason. This decision will not affect you in any way. If you decide to withdraw from this study, please notify your investigator in advance.

### **3. What does the participant need to do?**

In the process of participating, you need to cooperate with a brief mindfulness intervention training, and give feedback on touching your face as required.

### **4. What risks and discomforts will it bring?**

This study is a brief behavioural intervention, generally without adverse reactions; in terms of privacy protection, your personal information may be identified due to information leakage during information storage and sharing. The probability of the above risks is extremely small.

In addition to the existing risks, unknown risks may also occur during the research process.

### **5. What are the benefits?**

You will not receive any compensation for participating in this study. Participating in this study can participate in brief mindfulness training, which may reduce the probability of unconsciously touching your face, which can reduce the chance of infection of infectious diseases such as the new coronavirus.

### **6. Do I need to pay related fees?**

To participate in this research project, you do not need to pay related fees.

### **7. Compensation for participating in research, including compensation for injury.**

Participating in this research will not receive financial compensation.

### **8. Who will see my information?**

If you decide to participate in this study, your participation in the trial and your personal information in the trial are confidential. Your behaviour monitoring records and other information will be identified by the research number instead of your name. Information that can identify you will not be disclosed to members other than the research team unless with your permission. All research members and research sponsors are required to keep your identity confidential. Your files will be kept in a locked filing cabinet, which is only accessible to researchers. To ensure that the research is conducted in accordance with the regulations, when necessary, members of the government management department or the ethics review committee can access your personal data in the research unit according to the regulations. When the results of this research are published, no



1  
2  
3 personal information about you will be disclosed.  
4

5  
6 **9. What if an adverse event occurs?**

7 If you are harmed by participating in this study: In the event of damages related to this  
8 clinical study, our medical team will help you to get timely treatment, and adverse events  
9 will be handled as routine medical events in the hospital. You can choose not to participate  
10 in this research, or notify the researcher to withdraw from the research at any time, your  
11 data will not be included in the research results, and any of your medical treatment and  
12 rights will not be affected. If you need other treatments, or if you do not follow the study  
13 plan, or have a study-related injury or for any other reason, the study physician can  
14 terminate your continued participation in this study.  
15

16  
17  
18 **10. How to contact the researcher?**

19 You can keep abreast of the information and research progress related to this research. If  
20 you have any questions related to this research, or if you have any discomfort or injury  
21 during the research, or have questions about the rights of participants in this research You  
22 can contact the researchers at any time (18890098852), 11th Floor, Inpatient Department,  
23 Sir Run Run Shaw Hospital, Zhejiang University School of Medicine, No. 368, Xiasha Road,  
24 Economic and Technological Development Zone, Hangzhou, Zhejiang). If you have any  
25 questions about your rights as a patient participating in the study, please contact The  
26 Medical Ethics Committee of Sir Run Run Shaw Hospital, Zhejiang University School of  
27 Medicine, 0571-86006811.  
28  
29

**Informed consent Signed page**

- I have read this informed consent form.
- I have the opportunity to ask questions and all questions have been answered.
- I understand that participation in this study is voluntary.
- I can choose not to participate in this research, or I will withdraw after notifying the researcher at any time without being discriminated against or retaliated. Any of my medical treatment and rights will not be affected.
- If I need other treatment, or if I do not follow the research plan, or there is a research-related injury or for any other reason, the research physician can terminate my continued participation in this research.

Subject's electronic signature: \_\_\_\_\_

Date: \_\_\_\_\_ year \_\_\_\_\_ month \_\_\_\_\_ day

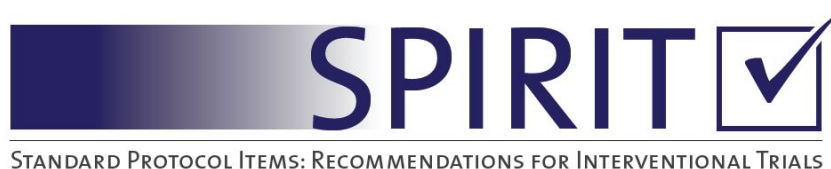

STANDARD PROTOCOL ITEMS: RECOMMENDATIONS FOR INTERVENTIONAL TRIALS

SPIRIT 2013 Checklist: Recommended items to address in a clinical trial protocol and related documents\*

| Section/item                                        | Item No | Description                                                                                                                                                                                                                                                                              |
|-----------------------------------------------------|---------|------------------------------------------------------------------------------------------------------------------------------------------------------------------------------------------------------------------------------------------------------------------------------------------|
| <b>Administrative information</b>                   |         |                                                                                                                                                                                                                                                                                          |
| P1,1-3 Title                                        | 1       | Descriptive title identifying the study design, population, interventions, and, if applicable, trial acronym                                                                                                                                                                             |
| P4, 54 Trial registration                           | 2a      | Trial identifier and registry name. If not yet registered, name of intended registry                                                                                                                                                                                                     |
|                                                     | 2b      | All items from the World Health Organization Trial Registration Data Set                                                                                                                                                                                                                 |
| Not applicable, Protocol version                    | 3       | Date and version identifier                                                                                                                                                                                                                                                              |
| P24,488-493 Funding                                 | 4       | Sources and types of financial, material, and other support                                                                                                                                                                                                                              |
| P1-2, 5-31; P24, 482-486 Roles and responsibilities | 5a      | Names, affiliations, and roles of protocol contributors                                                                                                                                                                                                                                  |
|                                                     | 5b      | Name and contact information for the trial sponsor                                                                                                                                                                                                                                       |
|                                                     | 5c      | Role of study sponsor and funders, if any, in study design; collection, management, analysis, and interpretation of data; writing of the report; and the decision to submit the report for publication, including whether they will have ultimate authority over any of these activities |
|                                                     | 5d      | Composition, roles, and responsibilities of the coordinating centre, steering committee, endpoint adjudication committee, data management team, and other individuals or groups overseeing the trial, if applicable (see Item 21a for data monitoring committee)                         |
| <b>Introduction</b>                                 |         |                                                                                                                                                                                                                                                                                          |
| P5-7, 69-117 Background and rationale               | 6a      | Description of research question and justification for undertaking the trial, including summary of relevant studies (published and unpublished) examining benefits and harms for each intervention                                                                                       |
|                                                     | 6b      | Explanation for choice of comparators                                                                                                                                                                                                                                                    |
| P7 119-133 Objectives                               | 7       | Specific objectives or hypotheses                                                                                                                                                                                                                                                        |

1  
2 P8, 140-147 Trial 8 Description of trial design including type of trial (eg, parallel group,  
3 design crossover, factorial, single group), allocation ratio, and framework (eg,  
4 superiority, equivalence, noninferiority, exploratory)  
5  
6  
7

### 8 **Methods: Participants, interventions, and outcomes**

9  
10 P8, 141 Study 9 Description of study settings (eg, community clinic, academic hospital)  
11 setting and list of countries where data will be collected. Reference to where  
12 list of study sites can be obtained  
13

14 P8, 147 P26, 546- 10 Inclusion and exclusion criteria for participants. If applicable, eligibility  
15 547 Eligibility criteria for study centres and individuals who will perform the  
16 criteria interventions (eg, surgeons, psychotherapists)  
17  
18

19 P14-15, 275-289 11a Interventions for each group with sufficient detail to allow replication,  
20 Interventions including how and when they will be administered  
21

22 11b Criteria for discontinuing or modifying allocated interventions for a  
23 given trial participant (eg, drug dose change in response to harms,  
24 participant request, or improving/worsening disease)  
25

26 11c Strategies to improve adherence to intervention protocols, and any  
27 procedures for monitoring adherence (eg, drug tablet return,  
28 laboratory tests)  
29

30 11d Relevant concomitant care and interventions that are permitted or  
31 prohibited during the trial  
32  
33

34 P16, 317-324 12 Primary, secondary, and other outcomes, including the specific  
35 Outcomes measurement variable (eg, systolic blood pressure), analysis metric  
36 (eg, change from baseline, final value, time to event), method of  
37 aggregation (eg, median, proportion), and time point for each  
38 outcome. Explanation of the clinical relevance of chosen efficacy and  
39 harm outcomes is strongly recommended  
40  
41

42 P21, 429-431 13 Time schedule of enrolment, interventions (including any run-ins and  
43 Participant washouts), assessments, and visits for participants. A schematic  
44 timeline diagram is highly recommended (see Figure)  
45  
46

47 P8-9, 149-168 14 Estimated number of participants needed to achieve study objectives  
48 Sample size and how it was determined, including clinical and statistical  
49 assumptions supporting any sample size calculations  
50

51 Recruitment 15 Strategies for achieving adequate participant enrolment to reach  
52 target sample size  
53

### 54 **Methods: Assignment of interventions (for controlled trials)**

55 Allocation:  
56  
57  
58  
59  
60

|    |                                                           |     |                                                                          |
|----|-----------------------------------------------------------|-----|--------------------------------------------------------------------------|
| 1  |                                                           |     |                                                                          |
| 2  | P10-11, 197-                                              | 16a | Method of generating the allocation sequence (eg, computer-              |
| 3  | 201 Sequence                                              |     | generated random numbers), and list of any factors for stratification.   |
| 4  | generation                                                |     | To reduce predictability of a random sequence, details of any planned    |
| 5  |                                                           |     | restriction (eg, blocking) should be provided in a separate document     |
| 6  |                                                           |     | that is unavailable to those who enrol participants or assign            |
| 7  |                                                           |     | interventions                                                            |
| 8  |                                                           |     |                                                                          |
| 9  |                                                           |     |                                                                          |
| 10 | P10-11, 199-                                              | 16b | Mechanism of implementing the allocation sequence (eg, central           |
| 11 | 200                                                       |     | telephone; sequentially numbered, opaque, sealed envelopes),             |
| 12 | Allocation                                                |     | describing any steps to conceal the sequence until interventions are     |
| 13 | concealment                                               |     | assigned                                                                 |
| 14 | mechanism                                                 |     |                                                                          |
| 15 |                                                           |     |                                                                          |
| 16 |                                                           |     |                                                                          |
| 17 | P10, 196-203                                              | 16c | Who will generate the allocation sequence, who will enrol participants,  |
| 18 | Implementation                                            |     | and who will assign participants to interventions                        |
| 19 |                                                           |     |                                                                          |
| 20 | P10, 200-203                                              | 17a | Who will be blinded after assignment to interventions (eg, trial         |
| 21 | Blinding                                                  |     | participants, care providers, outcome assessors, data analysts), and     |
| 22 | (masking)                                                 |     | how                                                                      |
| 23 |                                                           |     |                                                                          |
| 24 |                                                           | 17b | If blinded, circumstances under which unblinding is permissible, and     |
| 25 |                                                           |     | procedure for revealing a participant's allocated intervention during    |
| 26 |                                                           |     | the trial                                                                |
| 27 |                                                           |     |                                                                          |
| 28 |                                                           |     |                                                                          |
| 29 | <b>Methods: Data collection, management, and analysis</b> |     |                                                                          |
| 30 |                                                           |     |                                                                          |
| 31 | P17, 330-333                                              | 18a | Plans for assessment and collection of outcome, baseline, and other      |
| 32 | Data collection                                           |     | trial data, including any related processes to promote data quality (eg, |
| 33 | methods                                                   |     | duplicate measurements, training of assessors) and a description of      |
| 34 |                                                           |     | study instruments (eg, questionnaires, laboratory tests) along with      |
| 35 |                                                           |     | their reliability and validity, if known. Reference to where data        |
| 36 |                                                           |     | collection forms can be found, if not in the protocol                    |
| 37 |                                                           |     |                                                                          |
| 38 |                                                           |     |                                                                          |
| 39 |                                                           | 18b | Plans to promote participant retention and complete follow-up,           |
| 40 |                                                           |     | including list of any outcome data to be collected for participants who  |
| 41 |                                                           |     | discontinue or deviate from intervention protocols                       |
| 42 |                                                           |     |                                                                          |
| 43 |                                                           |     |                                                                          |
| 44 | P18-19, 371-374                                           | 19  | Plans for data entry, coding, security, and storage, including any       |
| 45 | Data                                                      |     | related processes to promote data quality (eg, double data entry;        |
| 46 | management                                                |     | range checks for data values). Reference to where details of data        |
| 47 |                                                           |     | management procedures can be found, if not in the protocol               |
| 48 |                                                           |     |                                                                          |
| 49 |                                                           |     |                                                                          |
| 50 | P19-20, 376-403                                           | 20a | Statistical methods for analysing primary and secondary outcomes.        |
| 51 | Statistical                                               |     | Reference to where other details of the statistical analysis plan can be |
| 52 | methods                                                   |     | found, if not in the protocol                                            |
| 53 |                                                           |     |                                                                          |
| 54 |                                                           | 20b | Methods for any additional analyses (eg, subgroup and adjusted           |
| 55 |                                                           |     | analyses)                                                                |
| 56 |                                                           |     |                                                                          |
| 57 |                                                           | 20c | Definition of analysis population relating to protocol non-adherence     |
| 58 |                                                           |     | (eg, as randomised analysis), and any statistical methods to handle      |
| 59 |                                                           |     | missing data (eg, multiple imputation)                                   |
| 60 |                                                           |     |                                                                          |

## Methods: Monitoring

|                                                                                                                                           |                                    |     |                                                                                                                                                                                                                                                                                                                                       |
|-------------------------------------------------------------------------------------------------------------------------------------------|------------------------------------|-----|---------------------------------------------------------------------------------------------------------------------------------------------------------------------------------------------------------------------------------------------------------------------------------------------------------------------------------------|
| 1<br>2<br>3<br>4<br>5<br>6<br>7<br>8<br>9<br>10<br>11<br>12<br>13<br>14<br>15<br>16<br>17<br>18<br>19<br>20<br>21<br>22<br>23<br>24<br>25 | P18-19, 373-374<br>Data monitoring | 21a | Composition of data monitoring committee (DMC); summary of its role and reporting structure; statement of whether it is independent from the sponsor and competing interests; and reference to where further details about its charter can be found, if not in the protocol. Alternatively, an explanation of why a DMC is not needed |
|                                                                                                                                           |                                    | 21b | Description of any interim analyses and stopping guidelines, including who will have access to these interim results and make the final decision to terminate the trial                                                                                                                                                               |
|                                                                                                                                           | P20, 405-414<br>Harms              | 22  | Plans for collecting, assessing, reporting, and managing solicited and spontaneously reported adverse events and other unintended effects of trial interventions or trial conduct                                                                                                                                                     |
|                                                                                                                                           | Auditing                           | 23  | Frequency and procedures for auditing trial conduct, if any, and whether the process will be independent from investigators and the sponsor                                                                                                                                                                                           |

## Ethics and dissemination

|                                                                                                                                                                                                                |                                              |     |                                                                                                                                                                                                                                  |
|----------------------------------------------------------------------------------------------------------------------------------------------------------------------------------------------------------------|----------------------------------------------|-----|----------------------------------------------------------------------------------------------------------------------------------------------------------------------------------------------------------------------------------|
| 26<br>27<br>28<br>29<br>30<br>31<br>32<br>33<br>34<br>35<br>36<br>37<br>38<br>39<br>40<br>41<br>42<br>43<br>44<br>45<br>46<br>47<br>48<br>49<br>50<br>51<br>52<br>53<br>54<br>55<br>56<br>57<br>58<br>59<br>60 | P20-21, 416-418<br>Research ethics approval  | 24  | Plans for seeking research ethics committee/institutional review board (REC/IRB) approval                                                                                                                                        |
|                                                                                                                                                                                                                | Protocol amendments                          | 25  | Plans for communicating important protocol modifications (eg, changes to eligibility criteria, outcomes, analyses) to relevant parties (eg, investigators, REC/IRBs, trial participants, trial registries, journals, regulators) |
|                                                                                                                                                                                                                | P21, 420-429<br>Consent or assent            | 26a | Who will obtain informed consent or assent from potential trial participants or authorised surrogates, and how (see Item 32)                                                                                                     |
|                                                                                                                                                                                                                |                                              | 26b | Additional consent provisions for collection and use of participant data and biological specimens in ancillary studies, if applicable                                                                                            |
|                                                                                                                                                                                                                | P19, 374<br>Confidentiality                  | 27  | How personal information about potential and enrolled participants will be collected, shared, and maintained in order to protect confidentiality before, during, and after the trial                                             |
|                                                                                                                                                                                                                | P24, 495-496<br>Declaration of interests     | 28  | Financial and other competing interests for principal investigators for the overall trial and each study site                                                                                                                    |
|                                                                                                                                                                                                                | P11, 201-203<br>Access to data               | 29  | Statement of who will have access to the final trial dataset, and disclosure of contractual agreements that limit such access for investigators                                                                                  |
|                                                                                                                                                                                                                | P8, 145-147<br>Ancillary and post-trial care | 30  | Provisions, if any, for ancillary and post-trial care, and for compensation to those who suffer harm from trial participation                                                                                                    |

|    |               |     |                                                                              |
|----|---------------|-----|------------------------------------------------------------------------------|
| 1  |               |     |                                                                              |
| 2  | P21, 431-433  | 31a | Plans for investigators and sponsor to communicate trial results to          |
| 3  | Dissemination |     | participants, healthcare professionals, the public, and other relevant       |
| 4  | policy        |     | groups (eg, via publication, reporting in results databases, or other        |
| 5  |               |     | data sharing arrangements), including any publication restrictions           |
| 6  |               |     |                                                                              |
| 7  |               | 31b | Authorship eligibility guidelines and any intended use of professional       |
| 8  |               |     | writers                                                                      |
| 9  |               |     |                                                                              |
| 10 |               | 31c | Plans, if any, for granting public access to the full protocol, participant- |
| 11 |               |     | level dataset, and statistical code                                          |
| 12 |               |     |                                                                              |
| 13 |               |     |                                                                              |

## Appendices

|    |                  |    |                                                                          |
|----|------------------|----|--------------------------------------------------------------------------|
| 14 |                  |    |                                                                          |
| 15 |                  |    |                                                                          |
| 16 | In supplementary | 32 | Model consent form and other related documentation given to              |
| 17 | file,            |    | participants and authorised surrogates                                   |
| 18 | Informed consent |    |                                                                          |
| 19 | materials        |    |                                                                          |
| 20 |                  |    |                                                                          |
| 21 |                  |    |                                                                          |
| 22 | Not applicable,  | 33 | Plans for collection, laboratory evaluation, and storage of biological   |
| 23 | Biological       |    | specimens for genetic or molecular analysis in the current trial and for |
| 24 | specimens        |    | future use in ancillary studies, if applicable                           |
| 25 |                  |    |                                                                          |

---

\*It is strongly recommended that this checklist be read in conjunction with the SPIRIT 2013 Explanation & Elaboration for important clarification on the items. Amendments to the protocol should be tracked and dated. The SPIRIT checklist is copyrighted by the SPIRIT Group under the Creative Commons "[Attribution-NonCommercial-NoDerivs 3.0 Unported](https://creativecommons.org/licenses/by-nc-nd/3.0/)" license.

# BMJ Open

## A brief mindfulness-based intervention of "STOP (Stop, Take a Breath, Observe, Proceed) touching your face": a study protocol of a randomized controlled trial

|                                 |                                                                                                                                                                                                                                                                                                                                                                                                                                                                                                                                                                                                                                                                                                                                                                                                                                                                                                                                                                                                                                                                                                                                                                                                                                                                                                                                                                                                                                                                                                                                                                                                                                                                                                                                                                                                                                                                                                                                                                                                 |
|---------------------------------|-------------------------------------------------------------------------------------------------------------------------------------------------------------------------------------------------------------------------------------------------------------------------------------------------------------------------------------------------------------------------------------------------------------------------------------------------------------------------------------------------------------------------------------------------------------------------------------------------------------------------------------------------------------------------------------------------------------------------------------------------------------------------------------------------------------------------------------------------------------------------------------------------------------------------------------------------------------------------------------------------------------------------------------------------------------------------------------------------------------------------------------------------------------------------------------------------------------------------------------------------------------------------------------------------------------------------------------------------------------------------------------------------------------------------------------------------------------------------------------------------------------------------------------------------------------------------------------------------------------------------------------------------------------------------------------------------------------------------------------------------------------------------------------------------------------------------------------------------------------------------------------------------------------------------------------------------------------------------------------------------|
| Journal:                        | <i>BMJ Open</i>                                                                                                                                                                                                                                                                                                                                                                                                                                                                                                                                                                                                                                                                                                                                                                                                                                                                                                                                                                                                                                                                                                                                                                                                                                                                                                                                                                                                                                                                                                                                                                                                                                                                                                                                                                                                                                                                                                                                                                                 |
| Manuscript ID                   | bmjopen-2020-041364.R2                                                                                                                                                                                                                                                                                                                                                                                                                                                                                                                                                                                                                                                                                                                                                                                                                                                                                                                                                                                                                                                                                                                                                                                                                                                                                                                                                                                                                                                                                                                                                                                                                                                                                                                                                                                                                                                                                                                                                                          |
| Article Type:                   | Protocol                                                                                                                                                                                                                                                                                                                                                                                                                                                                                                                                                                                                                                                                                                                                                                                                                                                                                                                                                                                                                                                                                                                                                                                                                                                                                                                                                                                                                                                                                                                                                                                                                                                                                                                                                                                                                                                                                                                                                                                        |
| Date Submitted by the Author:   | 28-Sep-2020                                                                                                                                                                                                                                                                                                                                                                                                                                                                                                                                                                                                                                                                                                                                                                                                                                                                                                                                                                                                                                                                                                                                                                                                                                                                                                                                                                                                                                                                                                                                                                                                                                                                                                                                                                                                                                                                                                                                                                                     |
| Complete List of Authors:       | <p>Liao, Yanhui; Zhejiang University School of Medicine Sir Run Run Shaw Hospital, Department of Psychiatry ; Key Laboratory of Medical Neurobiology of Zhejiang Province,<br/> Wang, Ling ; Florence Nightingale Faculty of Nursing, Midwifery &amp; Palliative Care,<br/> Luo, Tao ; Department of Social Medicine and Health Management, Xiangya School of Public Health, Central South University; Jiangxi Mental Hospital<br/> Wu, Shiyu ; The Third Affiliated Hospital of Guizhou Medical University<br/> Wu, Zhenzhen; Department of Psychiatry, the Second Xiangya Hospital, Central South University; National Clinical Research Center on Mental Disorders<br/> Chen, Jianhua ; Shanghai Clinical Research Center for Mental Health, Shanghai Key Laboratory of Psychotic Disorders, Shanghai Mental Health Center, Shanghai Jiao Tong University School of Medicine<br/> Pan, Chen ; Department of Clinical Psychology, the Third Xiangya Hospital, Central South University<br/> Wang, Yunfei; Department of Psychiatry, the Second Xiangya Hospital, Central South University; National Clinical Research Center on Mental Disorders<br/> Liu, Yueheng ; Department of Psychiatry, the Second Xiangya Hospital, Central South University; National Clinical Research Center on Mental Disorders<br/> Luo, Qinghua ; The first affiliated hospital of Chongqing Medical University<br/> Guo, Xin ; Psychiatry department, Renmin Hospital of Wuhan University<br/> Xie, Liqin; Changsha Social Work College<br/> Zhou, Jun ; Changsha Social Work College<br/> Chen, Wei ; Zhejiang University School of Medicine Sir Run Run Shaw Hospital, Department of Psychiatry, the Second Xiangya Hospital, Central South University; 2. Key Laboratory of Medical Neurobiology of Zhejiang Province,<br/> Tang, Jinsong; Zhejiang University School of Medicine Sir Run Run Shaw Hospital, Department of Psychiatry ; 2. Key Laboratory of Medical Neurobiology of Zhejiang Province,</p> |
| <b>Primary Subject Heading</b>: | Public health                                                                                                                                                                                                                                                                                                                                                                                                                                                                                                                                                                                                                                                                                                                                                                                                                                                                                                                                                                                                                                                                                                                                                                                                                                                                                                                                                                                                                                                                                                                                                                                                                                                                                                                                                                                                                                                                                                                                                                                   |



1  
2  
3  
4  
5  
6  
7  
8  
9  
10  
11  
12  
13  
14  
15  
16  
17  
18  
19  
20  
21  
22  
23  
24  
25  
26  
27  
28  
29  
30  
31  
32  
33  
34  
35  
36  
37  
38  
39  
40  
41  
42  
43  
44  
45  
46  
47  
48  
49  
50  
51  
52  
53  
54  
55  
56  
57  
58  
59  
60

|                                                                                                                                                         |                                                                                                                                                      |
|---------------------------------------------------------------------------------------------------------------------------------------------------------|------------------------------------------------------------------------------------------------------------------------------------------------------|
| Secondary Subject Heading:                                                                                                                              | Mental health, Infectious diseases                                                                                                                   |
| Keywords:                                                                                                                                               | EDUCATION & TRAINING (see Medical Education & Training), MENTAL HEALTH, PUBLIC HEALTH, Health & safety < HEALTH SERVICES ADMINISTRATION & MANAGEMENT |
| Note: The following files were submitted by the author for peer review, but cannot be converted to PDF. You must view these files (e.g. movies) online. |                                                                                                                                                      |
| Supplementary file 1_STOP_practice.mp3                                                                                                                  |                                                                                                                                                      |

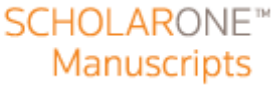



I, the Submitting Author has the right to grant and does grant on behalf of all authors of the Work (as defined in the below author licence), an exclusive licence and/or a non-exclusive licence for contributions from authors who are: i) UK Crown employees; ii) where BMJ has agreed a CC-BY licence shall apply, and/or iii) in accordance with the terms applicable for US Federal Government officers or employees acting as part of their official duties; on a worldwide, perpetual, irrevocable, royalty-free basis to BMJ Publishing Group Ltd ("BMJ") its licensees and where the relevant Journal is co-owned by BMJ to the co-owners of the Journal, to publish the Work in this journal and any other BMJ products and to exploit all rights, as set out in our [licence](#).

The Submitting Author accepts and understands that any supply made under these terms is made by BMJ to the Submitting Author unless you are acting as an employee on behalf of your employer or a postgraduate student of an affiliated institution which is paying any applicable article publishing charge ("APC") for Open Access articles. Where the Submitting Author wishes to make the Work available on an Open Access basis (and intends to pay the relevant APC), the terms of reuse of such Open Access shall be governed by a Creative Commons licence – details of these licences and which [Creative Commons](#) licence will apply to this Work are set out in our licence referred to above.

Other than as permitted in any relevant BMJ Author's Self Archiving Policies, I confirm this Work has not been accepted for publication elsewhere, is not being considered for publication elsewhere and does not duplicate material already published. I confirm all authors consent to publication of this Work and authorise the granting of this licence.

1  
2  
3  
4 1 **A brief mindfulness-based intervention of “STOP (Stop, Take a Breath,**  
5  
6  
7 2 **Observe, Proceed) touching your face”:** a study protocol of a  
8  
9  
10 3 **randomized controlled trial**  
11  
12  
13 4

15 5 Yanhui Liao<sup>1,2,3\*</sup>; Ling Wang<sup>4</sup>; Tao Luo<sup>5,6</sup>; Shiyu Wu<sup>7</sup>; Zhenzhen Wu<sup>8,9</sup>; Jianhua Chen<sup>10</sup>; Chen  
16  
17 6 Pan<sup>11</sup>; Yunfei Wang<sup>8,9</sup>; Yueheng Liu<sup>8,9</sup>; Qinghua Luo<sup>12</sup>; Xin Guo<sup>13</sup>; Liqin Xie<sup>14</sup>; Jun Zhou<sup>14</sup>; Wei  
18  
19  
20 7 Chen<sup>1,2</sup>; Jinsong Tang<sup>1,2</sup>

- 22  
23 8 1. Department of Psychiatry, Sir Run Run Shaw Hospital, School of Medicine, Zhejiang University,  
24  
25 9 Hangzhou, China  
26  
27  
28 10 2. Key Laboratory of Medical Neurobiology of Zhejiang Province, Hangzhou, China  
29  
30 11 3. Addictions Department, Institute of Psychiatry, Psychology and Neuroscience, King's College  
31  
32 12 London, London, UK  
33  
34  
35 13 4. Florence Nightingale Faculty of Nursing, Midwifery & Palliative Care, King's College London,  
36  
37 14 London, UK  
38  
39  
40 15 5. Department of Social Medicine and Health Management, Xiangya School of Public Health,  
41  
42 16 Central South University, Changsha, China  
43  
44  
45 17 6. Jiangxi Mental Hospital, Nanchang, China  
46  
47 18 7. The Third Affiliated Hospital of Guizhou Medical University, Qiannan, China  
48  
49  
50 19 8. Department of Psychiatry, the Second Xiangya Hospital, Central South University, Changsha,  
51  
52 20 China  
53  
54  
55 21 9. National Clinical Research Center on Mental Disorders, Changsha, China  
56  
57

- 1  
2  
3 22 10. Shanghai Clinical Research Center for Mental Health, Shanghai Key Laboratory of Psychotic  
4  
5  
6 23 Disorders, Shanghai Mental Health Center, Shanghai Jiao Tong University School of Medicine,  
7  
8 24 Shanghai, China  
9  
10  
11 25 11. Department of Clinical Psychology, the Third Xiangya Hospital, Central South University,  
12  
13 26 Changsha, China  
14  
15 27 12. The first affiliated hospital of Chongqing Medical University, Chongqing, China  
16  
17  
18 28 13. Psychiatry department, Renmin Hospital of Wuhan University, Wuhan, China  
19  
20  
21 29 14. Changsha Social Work College, Changsha, China  
22  
23 30 \*Corresponding Author: Yanhui Liao, 3 East Qingchun Road, Hangzhou, Zhejiang, P. R. China  
24  
25 31 (310016). E-mail: [liaoyanhui@zju.edu.cn](mailto:liaoyanhui@zju.edu.cn)  
26  
27  
28  
29  
30  
31  
32  
33  
34  
35  
36  
37  
38  
39  
40  
41  
42  
43  
44  
45  
46  
47  
48  
49  
50  
51  
52  
53  
54  
55  
56  
57  
58  
59  
60

## 32 **Abstract**

33 **Introduction** Face-touching behavior often happens frequently and automatically, and poses  
34 potential risk for spreading infectious disease. Mindfulness-based interventions (MBIs) have  
35 shown its efficacy in the treatment of behavior disorders. This study aims to evaluate an online  
36 mindfulness-based brief intervention skill named “STOP (Stop, Take a Breath, Observe, Proceed)  
37 touching your face” in reducing face-touching behavior.

38 **Methods and analysis** This will be an online-based, randomized, controlled, trial. We will recruit  
39 1,000 participants, and will randomize and allocate participants 1:1 to the “STOP touching your  
40 face” (both 750-word text and 5-min audio description by online) intervention group (n=500) and  
41 the wait-list control group (n=500). All participants will be asked to monitor and record their face-  
42 touching behavior during a 60-minute period before and after the intervention. Primary outcome  
43 will be the efficacy of short-term mindfulness-based “STOP touching your face” intervention for  
44 reducing the frequency of face-touching. The secondary outcomes will be percentage of  
45 participants touching their faces; the correlation between the psychological traits of mindfulness  
46 and face-touching behavior; and the differences of face-touching behavior between left-handers  
47 and right-handers. Analysis of covariance, regression analysis,  $\chi^2$  test, T-test, Pearson's  
48 correlations will be applied in data analysis. We will recruit 1000 participants from April to July  
49 2020 or until the recruitment process is complete. The follow-up will be completed in July 2020.  
50 We expect all trial results to be available by the end of July 2020.

51 **Ethics and dissemination** The study protocol has been approved by The Ethics Committee of Sir  
52 Run Run Shaw hospital, an affiliate of Zhejiang University, Medical College (NO. 20200401-32).  
53 Study results will be disseminated via social media and peer-reviewed publications.

1  
2  
3 54 **Trial registration number** NCT04330352.  
4  
5

6 55

7  
8 56 **Strengths and limitations of this study**  
9

10 57 • This is the first RCT to evaluate the efficacy of brief mindfulness intervention to reduce face-  
11  
12 touching behavior.  
13 58

14  
15 59 • This is a theoretical framework guided (mindfulness-based cognitive behavior theory) large  
16  
17 sample size RCT to evaluate the efficacy of “STOP touching your face” during the outbreak of  
18 60  
19 COVID-19.  
20 61

21  
22  
23 62 • “STOP touching your face” program is a free, brief, simple and widely accessible mindfulness-  
24  
25 based behavior change intervention.  
26 63

27  
28 64 • There is no digital videotape recording for the behavior of face-touching by researchers.  
29  
30 Alternatively, it will be self-monitored.  
31 65

32  
33 66 • This is only a brief intervention by internet. A face to face long-term mindfulness intervention  
34  
35 will help participants gain the maximum benefits of practice.  
36 67  
37  
38  
39  
40  
41  
42  
43  
44  
45  
46  
47  
48  
49  
50  
51  
52  
53  
54  
55  
56  
57  
58  
59  
60

## 69 Introduction

70 Nonverbal behavior plays an important role in interpersonal relations and constitutes a large  
71 amount of all communication. But self-touching is usually not used to communicate with others  
72 and is often done automatically without thinking about it at all in our daily life<sup>1</sup>. It might be one  
73 of the so called "autistic" gestures when they have no evident meaning<sup>2</sup>. Spontaneous facial self-  
74 touching or face-touching has been defined as *the use of the hand to touch the individual's own*  
75 *face* to scratch, rub, groom, or caress it. Research shows that the average face-touching  
76 frequency ranges from approximately 16<sup>3</sup> to 23<sup>4</sup> times per hour. Furthermore, research of face-  
77 touching across handedness showed that left-handed individuals more frequently touch their  
78 face than their counterparts<sup>5</sup>.

79  
80 An increase in face-touching frequency may result in increased risk of transmissible infections,  
81 defined as self-inoculation or auto-inoculation (a type of contact transmission occurs when a  
82 person transfers an infectious disease from one part of the body to another, e.g., when a  
83 contaminated hand makes subsequent contact with the nose and introduces contaminated  
84 material to those areas)<sup>3 4</sup>. Of all face-touching behaviors, touching the T-zones will pose a  
85 potential risk for transmission and acquisition of a range of infectious diseases. Unfortunately,  
86 research found that 42.2%<sup>6</sup> to 44%<sup>4</sup> of face-touching involved in contacting with a mucous  
87 membrane. Even clinicians touch their T-zones (the mucus membranes of the eyes, nose, and  
88 mouth) as frequently as 19 times on average within 2 hours<sup>7</sup>. Many diseases can be spread  
89 by self-inoculation in this way, including coronavirus disease 2019 ("COVID-19")<sup>8 9</sup>. Thus, the

1  
2  
3 90 Centers for Disease Control and Prevention (CDC) and the World Health Organization (WHO)  
4  
5  
6 91 have been telling people to stop touching their faces.  
7

8 92  
9  
10 93 However, even we all know that stop touching our faces will minimize spread of coronavirus and  
11  
12 94 other germs. The question is how to stop this behavior? Although face-touching is often an  
13  
14 95 automatic behavior without conscious thought or decision, research indicates that the frequency  
15  
16 96 of self-touching and the duration of touch and contact are associated with cognitive and  
17  
18 97 emotional demands<sup>10 11</sup>. In addition to emotional states, especially negative affect states, self-  
19  
20 98 touching also has been linked to information processing and production<sup>12</sup>.  
21  
22  
23  
24

25 99  
26  
27 100 Raising self-awareness of face-touching behavior may be effective in reducing or avoiding this  
28  
29 101 behavior. For example, every time when you touch your face, be mindful, notice how you  
30  
31 102 touched your face, check what you are thinking, physical and psychological feeling or your  
32  
33 103 sensation that preceded it. This process or skill is similar to “mindfulness practice” developed by  
34  
35 104 Jon Kabat Zinn<sup>13</sup>. Mindfulness can be defined as “*Mindful Awareness is the moment-by-moment*  
36  
37 105 *process of actively and openly observing one’s physical, mental and emotional experiences*”  
38  
39 106 (Mindful Awareness Research Center at the University of California at Los Angeles). Mindfulness-  
40  
41 107 based interventions (MBIs) are proven to be clinically efficacious in treatment of behavioral  
42  
43 108 disorders, such as alcohol drinking, smoking, gambling<sup>14-16</sup>, attention deficit/hyperactivity  
44  
45 109 disorder (ADHD)<sup>17</sup>, eating disorders<sup>18 19</sup>, as well as in enhancing the emotional health of Chinese  
46  
47 110 long-term male prison inmates<sup>20</sup>. Increasing peoples' awareness of their habituated face-  
48  
49 111 touching behavior may help individuals to avoid touching their face by contaminated hands, and  
50  
51  
52  
53  
54  
55  
56  
57  
58  
59  
60



1  
2  
3 112 decrease the risk of spreading infectious diseases. The structured MBIs, such as mindfulness-  
4  
5 113 based stress reduction (MBRS) and mindfulness-based cognitive therapy (MBCT) program, are 8  
6  
7  
8 114 to 10 weeks course<sup>21-24</sup>, but brief MBIs can also produce numerous health-related outcomes,  
9  
10 115 even only with one session intervention and as brief as 5 minutes<sup>25 26</sup>. Randomized controlled  
11  
12 116 trials (RCT) of a brief mindfulness-based intervention further suggested the feasibility and  
13  
14 117 effectiveness of short-term, self-guided, internet or smartphone-based interventions<sup>27 28</sup>.  
15  
16  
17  
18 118

19  
20 119 The primary objective of this proposed project is to identify a simple but effective practice to  
21  
22 120 reduce or avoid face-touching to low people's chances of catching infectious diseases like COVID-  
23  
24 121 19. Based on the efficacy of MBIs in treatment of some behavioral disorders and the efficacy of  
25  
26 122 short-term MBIs, we here propose a RCT of an online mindfulness-based brief intervention skill  
27  
28 123 named "STOP (Stop, Take a Breath, Observe, Proceed) touching your face". It is hypothesized  
29  
30 124 that this skill will be an effective, feasible, accessible skill in reducing or avoiding face-touching  
31  
32 125 for people in the general population. To be specific, the primary hypothesis of this brief  
33  
34 126 behavioral intervention is that, compared with a control intervention, the intervention would  
35  
36 127 result in greater reduction of face-touching behavior. We also hypothesize that the frequency of  
37  
38 128 face-touching behavior will also be reduced. Based on the theory that both face-touching  
39  
40 129 behavior and mindfulness link to cognitive or emotional process<sup>10 23</sup>, we hypothesize that people  
41  
42 130 with higher levels of self-reported mindfulness will touch their face less frequently. Given left-  
43  
44 131 handed individuals more frequently touch their face than their counterparts<sup>5</sup>, It is hypothesized  
45  
46 132 that, compared with right-handed participants, left-handed individuals will touch their face more  
47  
48 133 frequently during their 60-minute self-monitoring of face-touching.  
49  
50  
51  
52  
53  
54  
55  
56  
57  
58  
59  
60

134

## 135 **Methods and analysis**

### 136 **Patient and public involvement**

137 Neither participants nor the public were involved in the design, recruitment or conduct of the  
138 study.

139

### 140 **Study design and participants**

141 In this online-based, randomized, parallel-group trial, undertaken in China by internet, about  
142 1,000 participants willing to participate in “STOP touching your face” training program and  
143 provide electronic consent (e-consent), will be randomly allocated to mindfulness-based “STOP  
144 touching your face” intervention group or a control group at a 1:1 ratio. A 2 × 2 (practice group  
145 and control group × pre–post measurements) experimental design will be used. Since  
146 participants will be told that they will either receive “STOP touching your face” training program  
147 before (intervention group) or after (control group) the second 60-minute self-monitoring face-  
148 touching behavior, blinding of participants will not be possible. Blinding of the investigators  
149 (mainly Dr. Y Liao and Dr. L Wang) who are directly involved in interventions will also not be  
150 possible because of the nature differences of these two interventions (“STOP touching your face”  
151 training program intervention and control intervention). The investigators (Dr. J Tang and Dr. Y  
152 Liu) who will assess the outcomes will be blinded to participants’ allocated groups until all data  
153 have been analyzed. All participants who are allocated to the control group will have the  
154 opportunity to practice this skill after the end of the study period. An overview of participant  
155 eligibility criteria is given in **Table1**.

156

**157 Sample size and power calculation**

158 This study aims to recruit 1000 participants, with 500 in each group. The sample size assessment  
159 and power calculations are mainly on the basis of the results of RCTs of different types of online  
160 short-term mindfulness intervention for behavioral changes, such as for alcohol consumption<sup>16</sup>  
161 and stopping smoking or decreasing smoking craving<sup>29</sup>, or for positive psychological changes,  
162 such as enhancing wellbeing<sup>28</sup> and reducing perceived stress and anxiety/depression symptoms<sup>27</sup>.  
163 A single brief session of mindfulness of 11-minutes (n=34) detected a significant reduction in  
164 alcohol consumption compared with a relaxation control intervention (n=34)<sup>16</sup>. It is estimated  
165 that, for assessing stop face-touching behavior, individuals who received mindfulness  
166 intervention will at least twice likely to reduce the chance of touching T-Zone than the control  
167 group (5 to 10% vs. 2 to 4%). Thus, a total of 562 participants (281 participants in each group) are  
168 required to achieve 80% power (1-beta=0.8), as significant at the 5% level (alpha=0.05), an  
169 increase in the outcome measure from 4% in the control group to 10% in the intervention group.  
170 However, online interventions often have much higher dropout rate than face to face  
171 intervention. A web-based guided self-help intervention for preventing depression reported  
172 about 20% dropout rate at 6-month follow-up<sup>30</sup>, but a brief online mindfulness-based  
173 intervention for reducing stress, anxiety and depression reported 30% dropout rate in the  
174 intervention group and more than a half in the waiting list control group<sup>27</sup> Considering the high  
175 loss to follow-up rate, this study will have a final target sample size of 1000 participants (500 in  
176 each arm), which will have sufficient power to detect a significant difference for the outcomes.

177

1  
2  
3 **178 Recruitment**  
4

5  
6 179 As in other similar research, we will advertise this program online using social media (such as  
7  
8 180 WeChat and QQ) to recruit potential participants. Potential participants will register their interest  
9  
10 181 by sending messages by social media, email or sending text messages, or making a call to research  
11  
12 182 assistants (by Dr. Y Wang and Dr. Z Wu). Then, research assistants will contact respondents to  
13  
14 183 assess their eligibility and explain the study to each participant and inform them that they would  
15  
16 184 be allocated to either a control group or to a group that receives the Mindfulness-based “STOP  
17  
18 185 touching your face” program. Before collecting baseline data, electronically informed consent  
19  
20 186 will be obtained from each participant. Participants who enrolled in this study could withdraw at  
21  
22 187 any time. They will also be asked to provide contact information (will not be shared with any third  
23  
24 188 party), in case any problems arise.  
25  
26  
27  
28  
29

30 189

31  
32 **190 Baseline data**  
33

34  
35 191 Prior to randomization, demographic information and self-reported questionnaires will be  
36  
37 192 obtained from all participants at baseline (assessed by Dr. Y Liao, Dr. C Pan and Dr. Q Luo). The  
38  
39 193 demographic information of participants will be gender, age, years of education, marital status,  
40  
41 194 occupation by the International Standard Classification of Occupations (ISCO), living in rural or  
42  
43 195 urban region, smoker types (nonsmoker or current smoker and former smoker). The Five Facets  
44  
45 196 Mindfulness Questionnaire (FFMQ) will be applied to measure the dispositional tendency to  
46  
47 197 be mindful in daily life. The Edinburgh Handedness Inventory (EHI) will be used to assess  
48  
49 198 handedness. Frequency of face-touching will be assessed at baseline and after intervention.  
50  
51  
52  
53

54 199  
55  
56  
57  
58  
59  
60

## 200 **Randomization and group allocation**

201 After reporting the first 60-minute self-monitoring face-touching behavior, participants will be  
202 randomized and assigned (by Dr. Y Liu) to either start the intervention immediately (intervention  
203 condition) or to a wait-list control condition (who will be offered the intervention immediately  
204 after reporting the second 60-minute self-monitoring face-touching behavior). Randomization  
205 will be run by randomizeR, (<https://CRAN.R-project.org/package=randomizeR>). All participants  
206 will report the first self-monitoring by the same link (the same Excel file will be downloaded), and  
207 the second will be reported by two different links (two separated Excel files will be downloaded)  
208 to detect group allocation. Group allocation will not be concealed to investigators who will  
209 provide interventions. But the investigators (by Dr. J Tang and Dr. Y Liu) who will analyze the data  
210 for evaluating outcomes will be blinded to participants' treatment allocations until the entire  
211 analysis has been completed.

212

## 213 **Development of "STOP touching your face" training program**

### 214 ***Theory***

215 Face-touching behavior is often an automatic behavior that could potentially disseminate  
216 respiratory infections (eg, influenza, coronavirus), yet can be changed. However, changing the  
217 behavior of face-touching is "easier said than done", as there is only limited evidence for the  
218 neuropsychological basis or physiological fundamentals of this behavior. Research shows that  
219 the frequency of self-touching increases when attention is distracted<sup>10</sup>, as well as under stressful  
220 situations or with negative affect<sup>11</sup>. Cognitive behavioral theory-based mindfulness intervention  
221 (mindfulness-based cognitive therapy, MBCT<sup>24</sup>) has been used as a psychological intervention for

222 people with mental or behavior problems, targeting both cognitive and behavioral problems.

223 Mindfulness-based interventions (MBIs)<sup>13</sup> can help people cultivate positive affect, increase self-

224 awareness and concentration that are associated with reducing frequency of face-touching.

225 ***Practice***

226 STOP<sup>31</sup> is an acronym that stands for four action: “Stop”, “Take a breath”, “Observe”, “Proceed”.

227 It is a helpful aid in becoming more mindful of our body, behavior and emotion on a daily basis.

228 The following is the instruction for how to practice STOP:

229 **S = Stop**

230 Remind yourself to STOP. Whatever you are doing in this moment (e.g. touching your mouth,

231 pinching your nose, rubbing your eyes, resting your chin on your hands), pause for a minute.

232 **T = Take**

233 Take a deep breath. This reconnects you with your body. Pay attention to your breathing and

234 just allow yourself to continue to breathe normally and naturally.

235 **O = Observe**

236 OBSERVE what is happening for you in this moment—including thoughts, feelings, and

237 emotions (e.g. feel distracted, anxious or nervous?). What do you notice in your body (e.g. feel

238 itchy or tingling on any part of your face)? You can be aware of anything: posture, sensations,

239 tension in your body, or, once again, your breath. You might notice the sound around you. You

240 might even notice your thoughts or emotions

241 **P = Proceed**

242 Proceed with whatever you were doing before you came to a STOP or something that you want

243 to do in the moment (e.g. proceed with touching your face, or stop face-touching and take an  
244 alternative behavior).

245 The STOP Practice is very short, simple, and the acronym (STOP) makes it easy to remember as  
246 well. Thus, it has become one of the most popular mindfulness-based practices. The practice of  
247 STOP may cultivate a space between stimulus and response, which could help avoid the mostly  
248 spontaneous behavior of facial self-touching. The STOP Practice in Chinese was already  
249 developed by Dr. Y Liao, Dr. Q Luo and Dr. C Pan. Dr. Y Liao developed the “STOP touching your  
250 face” training program. Both 750-word text and 5-min audio description (see **Supplementary file**  
251 **1**) will be available by online.

## 252 **Procedures**

253 After advertising, participants who are interested in this study will be assessed for eligibility by  
254 making a call or communicating with social media (mainly WeChat). Then, eligible participants  
255 will sign a e-consent form (**Supplementary file 2**), and complete baseline information and the  
256 first self-monitoring of frequency of face-touching in a 60-minute period by online. Afterwards,  
257 participants will receive a brief mindfulness-based “STOP touching your face” intervention or  
258 control intervention. For both groups, the second self-monitoring of frequency of face-touching  
259 behavior will be taken at least 1 hour apart from the first one. The schedule of study procedures  
260 summarizes in **Figure 1**. The details of the procedure will include the following 3 steps:

### 261

#### 262 ***Step 1. The first 60-minute self-monitoring of face-touching behavior (before intervention)***

263 In order to measure the changes of face-touching behavior before and after intervention, all  
264 eligible participants will receive the instruction (in Chinese) of how to self-monitored and

1  
2  
3 265 reported the frequency of face-touching in any of the mucosal area (eyes, nose, mouth) and  
4  
5  
6 266 nonmucosal area (ears, cheeks, chin, neck, forehead, hair) during a 60-minute period. All  
7  
8 267 participants will be required to monitor their face-touching behavior during a 60-minute period,  
9  
10 268 and be encouraged to do it in a manageable situation. Wearing facial mask will not be permitted  
11  
12  
13 269 during the time of self-monitoring face-touching. All participants will be provided with the same  
14  
15 270 link to complete their baseline information and the first 60-minute self-monitoring of face-  
16  
17 271 touching behavior, and be encouraged to complete this questionnaire immediately after  
18  
19  
20 272 completion of self-monitoring.

21  
22  
23 273 Instruction: *"1. Please find a convenient time, no need to deliberately change your routine life  
24  
25 274 (such as working or studying at the desk, watching TV), observe and record how many times you  
26  
27 275 touched your hair, forehead, eyes, nose, mouth, ears, cheeks, Chin and neck in one-hour period  
28  
29 276 (if you touched your mouth and nose at one time, you should count one time for mouth-touching  
30  
31 277 and one time for nose-touching). If there is any information that you cannot understand, please  
32  
33 278 contact with me at any time; 2. fill in the following content immediately after completion of self-  
34  
35 279 monitoring (with a link to "hand-to-face contacts" behavior monitoring record 1); 3. please  
36  
37 280 contact with me to send the information about intervention to you when you completed the link.  
38  
39  
40 281 4. You will repeat another one-hour period self-monitoring after your receiving another  
41  
42 282 information (either "STOP touching your face" program or just thanks words)."*

43  
44  
45  
46  
47 283

## 48 49 284 **Step 2. Intervention**

50  
51  
52 285 **The intervention group:** Participants from the intervention group will receive the online  
53  
54 286 mindfulness-based "STOP touching your face" program (both 750-word text and 5-min audio  
55  
56  
57



1  
2  
3 287 description). Each participant will be required to read the text of the program first and then listen  
4  
5  
6 288 to the audio. They will be encouraged to practice this technique until they feel confident and  
7  
8 289 natural. The systematic review showed the efficacy of single session of brief MBIs, the average  
9  
10 290 length of which was 15 minutes, ranged from less than 5 to 25 min<sup>25</sup>. Thus, the requirement  
11  
12  
13 291 practice time will be at least 15 minutes (excluding the time of reading the text and the first time  
14  
15 292 of listening to the audio). This online mindfulness-based intervention will not have face-to-face  
16  
17  
18 293 interaction between the experimenter and participants throughout the entire study.

19  
20 294 **The control group:** Participants who allocate to the control group will only receive information  
21  
22 295 to thank them and encourage them to complete the study. They will be reminded to receive  
23  
24  
25 296 “STOP touching your face” program after the end of this study.

26  
27  
28 297 **Both groups:** Participants from both groups will be reminded to contact with us to provide the  
29  
30 298 instruction of another self-monitoring behavior of face-touching.

31  
32  
33 299  
34  
35 300 **Step 3. The second 60-minute self-monitoring of face-touching behavior (after intervention)**

36  
37 301 After intervention, all participants will be required to monitor their face-touching behavior during  
38  
39 302 a 60-minute period again. When participants tell us “*I am ready to do another self-monitoring*”,  
40  
41  
42 303 they will receive instruction of how to complete the second 60-minute self-monitoring of face-  
43  
44  
45 304 touching behavior during a 60-minute period. The repeat measurement of the face-touching  
46  
47 305 behavior will be done at least 1 hour apart from the first self-monitoring. All participants will be  
48  
49 306 encouraged to monitor their face-touching behavior in two similar situations.

50  
51  
52 307 Instruction: “*1. Again, please find a convenient time, no need to deliberately change your routine*  
53  
54 308 *life (such as working or studying at the desk, watching TV), observe and record how many times*

1  
2  
3 309 *you touched your hair, forehead, eyes, nose, mouth, ears, cheeks , Chin and neck in one-hour*  
4  
5  
6 310 *period (if you touched your mouth and nose at one time, you should count one time for month-*  
7  
8 311 *touching and one time for nose-touching). It is better to find a similar situation (the similar time*  
9  
10 312 *if not in the same day, same place, and when you are doing the same thing). You need to do it at*  
11  
12 313 *least 1 hour apart from the last observation. If there is any information that you cannot*  
13  
14 314 *understand, please contact with me at any time; 2. fill in the following content immediately after*  
15  
16 315 *completing self-monitoring (with a link to "hand-to-face contacts" behavior monitoring record 2,*  
17  
18 316 *the two groups will receive different links); 3. please let me known when you completed the link*  
19  
20 317 *(the intervention group); please contact with me to send the program to you when you completed*  
21  
22 318 *the link (the control group)."*  
23  
24  
25  
26  
27  
28  
29

30 320 All participants will be thanked and encouraged to practice "STOP touching your face" regularly  
31  
32 321 after the end of the study. All outcomes will be collected by an online survey through the Chinese  
33  
34 322 professional survey software WenJuanXing (Sojump, Shanghai, China, [www.sojump.com](http://www.sojump.com)). For  
35  
36 323 non-responders, a reminding message will be sent to them by their provided contact information  
37  
38 324 for reporting the outcomes.  
39  
40  
41  
42  
43  
44

## 45 326 **Outcomes**

46  
47 327 **Primary outcome:** the efficacy of short-term mindfulness-based "STOP touching your face"  
48  
49 328 intervention ( $\geq 15$ min) for reducing face-touching behavior, measuring by reduction of frequency  
50  
51 329 of face touching behavior (this will be calculated as the total times of face-touching (including  
52  
53  
54  
55  
56  
57  
58  
59  
60

1  
2  
3 330 the eyes, nose, mouth, ears, cheeks, chin, neck, forehead, hair) during a 60-minute period before  
4  
5  
6 331 the intervention minus the total times of face-touching after the intervention).

7  
8 332 **Secondary outcomes:** the reduction of percentage of participants touching their faces (this will  
9  
10 333 be calculated as the percentage of participants touching their faces (including any of the  
11  
12  
13 334 following areas: the eyes, nose, mouth, ears, cheeks, chin, neck, forehead, hair) during a 60-  
14  
15 335 minute period before the intervention - the percentage of participants touching their faces after  
16  
17 336 the intervention) after intervention; the factors (demographic characteristics, psychological traits  
18  
19 337 of mindfulness) that would be associated with reduction of frequency of face-touching; the  
20  
21 338 differences of face-touching behavior between left-handers and right-handers.  
22  
23  
24

25 339

## 26 27 340 **Measures**

28  
29  
30 341 **1. Frequency of face-touching:** Self-observation or self-monitoring of face-touching behavior will  
31  
32 342 be required to report from each participant. A standardized scoring sheet will be provided to tally  
33  
34 343 the frequency of hand-to-face contacts, the touched area of the face, including the mucosal area  
35  
36 344 (eyes, nose, mouth) and nonmucosal area (ears, cheeks, chin, neck, forehead, hair) , and the  
37  
38 345 time in seconds of each contact will be recorded in a 60-minute period <sup>4</sup>.

39  
40  
41  
42 346 **2. Percentage of participants touching their faces:** this will be the number of participants who  
43  
44 347 touched any of the following areas: the eyes, nose, mouth, ears, cheeks, chin, neck, forehead,  
45  
46 348 hair, during their 60-minute self-monitoring of face-touching / the total number of participants  
47  
48 349 in the intervention group or the control group.

49  
50  
51 350 **3. Five Facet Mindfulness Questionnaire (FFMQ)**<sup>32-34</sup>: this self-report scale is currently the most  
52  
53 351 frequently used mindfulness questionnaire to measure changes in participant's tendency to be  
54  
55  
56  
57

1  
2  
3 352 mindful in daily life by the following five related facets: observing(noticing, attending to  
4  
5  
6 353 sensations, perceptions, thoughts, feelings; 8 items), describing (labeling feelings, thoughts with  
7  
8 354 words), acting with awareness (automatic pilot, concentration, non-distraction), non-judging  
9  
10 355 internal experience, and non-reactivity to internal experience. Participants will be asked to what  
11  
12  
13 356 extent each of the statements are true of them. Each item is on a 1 to 5 Likert scale, ranging from  
14  
15 357 1 (never or very rarely true) to 5 (very often or always true). The scores represent a spectrum of  
16  
17  
18 358 mindfulness with no cut-off points, higher scores indicate higher levels of mindfulness. The  
19  
20 359 factor structure of the short version (FFMQ-15) will be used in this study, which has been  
21  
22  
23 360 consistent with that of the FFMQ-39<sup>35</sup>.

24  
25 361 **4. The Edinburgh Handedness Inventory (EHI)** <sup>36 37</sup>: EHI is the most widely used 10-item self-  
26  
27 362 report inventory to assess handedness. It is comprised of the following 10 activities: (1) writing,  
28  
29  
30 363 (2) drawing, (3) throwing, (4) using scissors, (5) a toothbrush (6) knife (without fork), (7) spoon,  
31  
32 364 and such activities involving both hands as (8) using a broom (upper hand), (9) striking a match,  
33  
34  
35 365 and (10) unscrewing the lid of a bottle. To complete the EHI, one or two check marks are placed  
36  
37 366 under “left (L)” or “right (R)” columns, indicating strength of preference for each activity.  
38  
39  
40 367 Participants will be asked write “2”, “1” or “0” in the appropriate corresponding column. If the  
41  
42 368 preference is very strong that they would never try to use the other hand unless absolutely forced  
43  
44  
45 369 to, then they will mark this column as “2” and the other column as “0”. If they are really  
46  
47 370 indifferent, they will mark it as “1” in both columns. A laterality quotient ( $LQ = R - L/R + L \times 100$ )  
48  
49 371 can be calculated, where a score of 100 reflects complete right-handedness, and a score of -100  
50  
51 372 reflects complete left-handedness.

52  
53  
54 373  
55  
56  
57

### 374 **Withdrawal from the Program**

375 Every participant will feel free to withdraw from the study at any time and without giving any  
376 reason. On the basis of the intention-to-treat (ITT) principle<sup>38</sup>, participants who fail to respond to  
377 the second assessment will be retained in the analysis according to the arm they were  
378 randomized to, irrespective of whether they did the intervention or not. Only participants who  
379 request withdrawal from the study will be excluded from the analysis, and reasons for withdrawal  
380 will be noted if they are available. However, self-monitoring itself may increase the awareness of  
381 face-touching behavior, then consequently increase or decrease the frequency of face-touching  
382 behavior in the second time of observation. Alternatively, a complete case analysis will also be  
383 performed in which any participant withdrew from the study in the second observation will be  
384 excluded.

### 386 **Data collection**

387 Data will be collected on line by WenJuanXing, a Chinese online market research Web site that  
388 provides professional online questionnaire survey or data collection for RCTs<sup>39</sup>. Data will be  
389 monitored by data monitoring committee of the hospital. Personal data will be de-identified.

### 391 **Data analysis**

392 All data will be automatically collected by internet. A user-specified Excel file will be downloaded  
393 from the database. There will be no interim analyses. When all data have been obtained, they  
394 will be analyzed and blinded to intervention assignment by the trial statistician using R software  
395 (R Foundation for Statistical Computing, Vienna, Austria. <https://www.r-project.org/>) and SPSS

1  
2  
3 396 (IBM Corp. Released 2013. IBM SPSS Statistics for Windows, Version 22.0. Armonk, NY: IBM Corp.).  
4  
5  
6 397 Descriptive statistics will be applied for demographic and face-touching-related characteristics at  
7  
8 398 baseline; two sample T-test or Mann-Whitney U test (for continuous variables) and  $\chi^2$  test (for  
9  
10 399 categorical variables) will be applied to compare the demographic information and face-touching  
11  
12 400 behavior at baseline between the STOP intervention group and control group. Percentage of  
13  
14 401 touching the T-Zone participants between pre- and post- intervention in the STOP group and the  
15  
16 402 control group will be compared by  $\chi^2$  test. For assessing the primary outcome, determining if the  
17  
18 403 “STOP touching your face” intervention group showed a reduction of face-touching behavior than  
19  
20 404 the control group, two sample T-test or Mann-Whitney U test will first be applied to compared  
21  
22 405 group differences in reduction of the frequency of face-touching. Then, analysis of covariance  
23  
24 406 (ANCOVA) will be applied with controlling for demographic information (such age, handedness  
25  
26 407 and prior mindfulness meditation experience). In ANCOVA model, the dependent variable will be  
27  
28 408 the reduction of face-touching behavior. The pre-intervention measure of the total times of face-  
29  
30 409 touching will be controlled as a covariate, and intervention will be a fix factor. This model will  
31  
32 410 assess the differences in the post-intervention means after accounting for pre-intervention  
33  
34 411 values. Pearson's correlations or regression analysis (linear and binary regression model) will be  
35  
36 412 used to explore the any factor that associated with face-touching behavior at baseline and  
37  
38 413 reduction of face-touching behavior in the intervention group and in the control group. Intention-  
39  
40 414 to-treat (ITT) basis will be applied in this study, all participants who complete the first 60-minute  
41  
42 415 self-monitoring face-touching behavior will be retained in the analysis. The last-observation-  
43  
44 416 carried-forward (LOCF) method will be applied to handle incomplete or missing data (assuming  
45  
46 417 for no reduction of the frequency of face-touching). In addition, a complete case analysis will be  
47  
48  
49  
50  
51  
52  
53  
54  
55  
56  
57  
58  
59  
60

1  
2  
3 418 performed in which any participant with missing information on the follow-up will be  
4  
5  
6 419 excluded. All tests will be 2-tailed. A two-sided  $P < 0.05$  will be used to determine statistical  
7  
8 420 significance.

9  
10 421

## 12 422 **Safety**

13  
14  
15 423 Throughout the “STOP touching your face” program, participants will be encouraged to  
16  
17 424 communicate with us if they experience any mindfulness practice relative issues. Adverse events  
18  
19 425 will be monitored during the study. The MBIs are regarded as relatively safe interventions<sup>40</sup>.  
20  
21 426 Research showed that even highly vulnerable participants (such as patients with major  
22  
23 427 depressive disorder<sup>41</sup>) can safely practice mindfulness, but if participants experience any health-  
24  
25 428 related issues, they will be encouraged to contact with us, or we will refer a health care provider.  
26  
27 429 This study is not clinical-facilitated and may have very low risk of any safety issue. We will send a  
28  
29 430 message to each participant to check whether they have any safety issues after providing them  
30  
31 431 with intervention instruction.  
32  
33  
34  
35  
36  
37  
38  
39

## 40 433 **Ethics and dissemination**

41  
42 434 The study protocol has been approved by The Ethics Committee of Sir Run Run Shaw hospital, an  
43  
44 435 affiliate of Zhejiang University, Medical College (NO. 20200401-32). All activities associated with  
45  
46 436 this protocol will be conducted in full compliance with the approved policies and procedures.  
47  
48 437 Electronically Informed consent (this e-consent is a form of written consent) will be  
49  
50 438 communicated and obtained from each participant prior to participation. All participant will be  
51  
52 439 explained about the purpose, procedures and assessments, potential risks and benefits of the  
53  
54  
55  
56  
57  
58  
59  
60

1  
2  
3 440 trial before recruitment. After fully understanding the study, participants will be informed that  
4  
5  
6 441 their participation in this research study is total voluntary. They can choose to (sign the  
7  
8 442 electronic consent form by selecting “agree to participant”) or not to participate (sign the  
9  
10 443 electronic consent form by selecting “disagree to participant”). Participation can withdrawal at  
11  
12  
13 444 any time without reasons. Contact information (phone number and social media contact like  
14  
15 445 WeChat contact ID) of the study coordinator for any future questions and concerns will be  
16  
17  
18 446 provided and informed to each participant. We will recruit 1000 participants from April to July  
19  
20 447 2020 or until the recruitment process is complete. The follow-up will be completed in July 2020.  
21  
22  
23 448 We expect all trial results to be available by the end of July 2020. Any results from this trial  
24  
25 449 (publications, conference presentations) will be disseminated via social media and be published  
26  
27  
28 450 in peer-reviewed journals and conference proceedings.

29  
30 451

## 31 32 452 **Discussion**

33  
34  
35 453 This RCT is to investigate the efficacy of brief mindfulness-based intervention of “STOP touching  
36  
37  
38 454 your face” for people from general population in China. To our knowledge, this will be the first  
39  
40 455 RCT to evaluate the efficacy of brief mindfulness intervention to reduce face-touching behavior  
41  
42  
43 456 on the basis of mindfulness and cognitive behavioral principles.

44  
45 457

46  
47  
48 458 The strength of this study is that this is a theoretical framework guided (mindfulness-based  
49  
50 459 cognitive behavior theory) large sample size RCT to evaluate the efficacy of “STOP touching your  
51  
52  
53 460 face” during the outbreak of COVID-19. If “STOP touching your face” program is proved to be  
54  
55 461 effective, it opens up its potential application worldwide at the population level. As “STOP



1  
2  
3 462 touching your face” program is a free, brief, simple and widely accessible mindfulness-based  
4  
5  
6 463 behavior change intervention, the public health impact of its expansion world-wide could be  
7  
8 464 enormous, helping us to manage any face-touching spread infectious diseases, like COVID-19.  
9

10  
11 465  
12  
13 466 There are some limitations in this study. First, there is no digital videotape recording for the  
14  
15 467 behavior of face-touching by researchers. Alternatively, it will be self-monitored. Self-monitoring  
16  
17  
18 468 of physical (such as blood pressure), and mental health (such as anger or frustration that comes  
19  
20 469 from daily life) has been used as a strategy for improving the treatment of a number of chronic  
21  
22  
23 470 conditions or reducing unhealth behaviors including smoking, drinking, gambling and so on<sup>42</sup>.

24  
25 471 Thus, self-monitoring itself may change participants face-touching behavior by creating a more  
26  
27  
28 472 active role in observing this behavior. Also, self-reported results of self-monitored times of face  
29  
30 473 touching may be overestimated or underestimated. Furthermore, self-monitoring itself may  
31  
32  
33 474 increase the awareness of face-touching behavior, then consequently increase or decrease the  
34  
35 475 frequency of face-touching behavior in the second time of observation. The results will be more  
36  
37  
38 476 accurate under lab conditions. In order to reduce the bias, we will invite a sub-group of  
39  
40 477 participants with video record by another person to confirm the consistency of these results.

41  
42 478 Second, this is only an online intervention, participants may be more likely to drop out from the  
43  
44  
45 479 study. Thus, we will encourage participants contact with us if they have any questions or concerns.

46  
47 480 We will also apply an intention-to-treat principle to prevent potential bias caused by missing data  
48  
49  
50 481 from loss to follow-up, as well as a complete case analysis. Third, this is only a brief intervention  
51  
52 482 by internet. A face to face long-term mindfulness intervention will help participants gain the  
53  
54  
55 483 maximum benefits of practice. However, neuroimaging study demonstrates that both long and

1  
2  
3 484 short-term mindfulness practice can improve automatic emotion regulation<sup>43</sup>, and RCT shows  
4  
5  
6 485 that brief online mindfulness-based intervention can also increase mindfulness and decrease  
7  
8 486 perceived stress and symptoms of anxiety or depression<sup>27</sup>. Fourth, this is a mindfulness-based  
9  
10  
11 487 intervention, and mindfulness could make participants better at catching themselves touching  
12  
13 488 their faces, so participants from the intervention group may report higher frequency than the  
14  
15  
16 489 control group in the second 60-minute self-monitoring of face-touching behavior. Last, we  
17  
18 490 submitted this protocol to the journal during the time of recruiting.  
19

20 491  
21  
22  
23 492 In conclusion, this is the first RCT to evaluate the efficacy of brief mindfulness intervention to  
24  
25 493 reduce face-touching behavior. If “STOP touching your face”, a brief and simple skill, is proven  
26  
27  
28 494 effective, the public health impact of its expansion world-wide could be enormous, its  
29  
30 495 dissemination will help us to manage any face-touching spread infectious diseases, like  
31  
32 496 Coronavirus disease 2019 (COVID-19).  
33

34  
35 497  
36  
37 498 **Availability of data and materials**  
38  
39  
40 499 All data in the current study will be available from the corresponding author on reasonable  
41  
42 500 request and with completion of data user agreement.  
43  
44

45 501  
46  
47 502 **Authors' Contributions**  
48  
49  
50 503 YLiao and JT developed and designed the study. YLiao, CP and QL developed STOP Practice, YLiao  
51  
52 504 developed the “STOP touching your face” training program. Yliao discussed with LW and WC on  
53  
54 505 the planning and conduct of the study, and discussed with YLiu and JT on the acquisition of data  
55  
56  
57  
58  
59  
60

1  
2  
3 506 and the planning of data analysis. YLiao, LW, TL, SW, ZW, JC, CP, YW, LX and JZ conducted the  
4  
5 507 interventions. JT and YLiu conducted data analysis. YLiao took the lead in drafting the manuscript  
6  
7 508 protocol with contributions by JT and JC. LQ, XG and WC advised the study design, and  
8  
9  
10 509 coordinated study approval. All authors read and proposed critical comments, as well as  
11  
12  
13 510 approved the manuscript for publication.  
14

15 511

### 18 512 **Funding**

19  
20 513 The research is supported by Zhejiang University special scientific research fund for COVID-19  
21  
22 514 prevention and control (2020XGZX046), the “Hundred Talents Program” funding from Zhejiang  
23  
24 515 University, and the K.C. Wong Postdoctoral Fellowship to study at King's College London (KCL).  
25  
26  
27 516 The funders had no role in study design, data collection and analysis, decision to write the report  
28  
29  
30 517 or to submit the paper for publication.  
31

32 518

### 35 519 **Competing interests statement**

36  
37 520 Dr. Y Liao developed the “STOP touching your face” training program. No other potential conflicts  
38  
39  
40 521 of interest to declare.  
41

42 522

### 45 523 **Acknowledgements**

46  
47 524 Dr. Y Liao would like to thank Professor Ann McNeill from KCL for her suggestions and thank 5P  
48  
49 525 Medicine (5P Yixue APP) for providing STOP audio description (see supplementary file). Dr. Y Liao,  
50  
51  
52 526 Dr. C Pan and Dr. Q Luo would like to thank the UCLA (the University of California at Los Angeles)  
53  
54  
55  
56  
57  
58  
59  
60

1  
2  
3 527 Mindful Awareness Research Center for providing opportunities to them to learn and practice  
4  
5  
6 528 mindfulness.

7  
8 529

9  
10 **References**

- 11  
12  
13 531 1. Harrigan JA, Kues JR, Weber JG. Impressions of hand movements: Self-touching and gestures.  
14 532 *Perceptual and motor skills* 1986;63(2):503-16.  
15 533 2. Krout MH. Autistic gestures: An experimental study in symbolic movement. *Psychological*  
16 534 *Monographs* 1935;46(4):i.  
17 535 3. Nicas M, Best D. A study quantifying the hand-to-face contact rate and its potential application to  
18 536 predicting respiratory tract infection. *Journal of occupational and environmental hygiene*  
19 537 2008;5(6):347-52.  
20 538 4. Kwok YLA, Gralton J, McLaws M-L. Face touching: A frequent habit that has implications for hand  
21 539 hygiene. *American journal of infection control* 2015;43(2):112-14.  
22 540 5. Dimond S, Harries R. Face touching in monkeys, apes and man: Evolutionary origins and cerebral  
23 541 asymmetry. *Neuropsychologia* 1984;22(2):227-33.  
24 542 6. Measurement of Face-touching Frequency in a Simulated Train. E3S Web of Conferences; 2019. EDP  
25 543 Sciences.  
26 544 7. Elder NC, Sawyer W, Pallerla H, et al. Hand hygiene and face touching in family medicine offices: a  
27 545 Cincinnati Area Research and Improvement Group (CARInG) network study. *The Journal of the*  
28 546 *American Board of Family Medicine* 2014;27(3):339-46.  
29 547 8. Huang C, Wang Y, Li X, et al. Clinical features of patients infected with 2019 novel coronavirus in  
30 548 Wuhan, China. *The Lancet* 2020;395(10223):497-506.  
31 549 9. Ong SWX, Tan YK, Chia PY, et al. Air, surface environmental, and personal protective equipment  
32 550 contamination by severe acute respiratory syndrome coronavirus 2 (SARS-CoV-2) from a  
33 551 symptomatic patient. *Jama* 2020  
34 552 10. Mueller SM, Martin S, Grunwald M. Self-touch: Contact durations and point of touch of spontaneous  
35 553 facial self-touches differ depending on cognitive and emotional load. *PloS one* 2019;14(3)  
36 554 11. Grunwald M, Weiss T, Mueller S, et al. EEG changes caused by spontaneous facial self-touch may  
37 555 represent emotion regulating processes and working memory maintenance. *brain research*  
38 556 2014;1557:111-26.  
39 557 12. Harrigan JA. Self-touching as an indicator of underlying affect and language processes. *Social science*  
40 558 *& medicine* 1985;20(11):1161-68.  
41 559 13. Kabat-Zinn J. Mindfulness-based interventions in context: past, present, and future. *Clinical*  
42 560 *psychology: Science and practice* 2003;10(2):144-56.  
43 561 14. Cavicchioli M, Movalli M, Maffei C. The Clinical Efficacy of Mindfulness-Based Treatments for Alcohol  
44 562 and Drugs Use Disorders: A Meta-Analytic Review of Randomized and Nonrandomized  
45 563 Controlled Trials. *European addiction research* 2018;24(3):137-62. doi: 10.1159/000490762  
46 564 [published Online First: 2018/07/18]  
47 565 15. Sancho M, De Gracia M, Rodríguez RC, et al. Mindfulness-based interventions for the treatment of  
48 566 substance and behavioral addictions: a systematic review. *Frontiers in psychiatry* 2018;9:95.  
49 567 16. Kamboj SK, Irez D, Serfaty S, et al. Ultra-Brief Mindfulness Training Reduces Alcohol Consumption in  
50 568 At-Risk Drinkers: A Randomized Double-Blind Active-Controlled Experiment. *International*  
51 569 *Journal of Neuropsychopharmacology* 2017;20(11):936-47. doi: 10.1093/ijnp/pyx064

17. Haydicky J, Wiener J, Badali P, et al. Evaluation of a mindfulness-based intervention for adolescents with learning disabilities and co-occurring ADHD and anxiety. *Mindfulness* 2012;3(2):151-64.
18. Kristeller JL, Wolever RQ. Mindfulness-based eating awareness training for treating binge eating disorder: the conceptual foundation. *Eating disorders* 2010;19(1):49-61.
19. Wanden-Berghe RG, Sanz-Valero J, Wanden-Berghe C. The application of mindfulness to eating disorders treatment: a systematic review. *Eating disorders* 2010;19(1):34-48.
20. Xu W, Jia K, Liu X, et al. The effects of mindfulness training on emotional health in Chinese long-term male prison inmates. *Mindfulness* 2016;7(5):1044-51.
21. Shonin E, Van Gordon W, Griffiths M. Mindfulness-based interventions: Towards mindful clinical integration. *Frontiers in Psychology* 2013;4:194.
22. Carmody J, Baer RA. Relationships between mindfulness practice and levels of mindfulness, medical and psychological symptoms and well-being in a mindfulness-based stress reduction program. *Journal of behavioral medicine* 2008;31(1):23-33.
23. Grossman P, Niemann L, Schmidt S, et al. Mindfulness-based stress reduction and health benefits: A meta-analysis. *Journal of psychosomatic research* 2004;57(1):35-43.
24. Segal ZV, Teasdale J. Mindfulness-based cognitive therapy for depression: Guilford Publications 2018.
25. Howarth A, Smith JG, Perkins-Porras L, et al. Effects of Brief Mindfulness-Based Interventions on Health-Related Outcomes: a Systematic Review. *Mindfulness* 2019:1-12.
26. Chen Y, Yang X, Wang L, et al. A randomized controlled trial of the effects of brief mindfulness meditation on anxiety symptoms and systolic blood pressure in Chinese nursing students. *Nurse education today* 2013;33(10):1166-72.
27. Cavanagh K, Strauss C, Cicconi F, et al. A randomised controlled trial of a brief online mindfulness-based intervention. *Behaviour research and therapy* 2013;51(9):573-78.
28. Howells A, Ivtzan I, Eiroa-Orosa FJ. Putting the 'app' in happiness: a randomised controlled trial of a smartphone-based mindfulness intervention to enhance wellbeing. *Journal of Happiness Studies* 2016;17(1):163-85.
29. Garrison KA, Pal P, O'Malley SS, et al. Craving to quit: a randomized controlled trial of smartphone app-based mindfulness training for smoking cessation. *Nicotine and Tobacco Research* 2020;22(3):324-31.
30. Buntrock C, Ebert DD, Lehr D, et al. Effect of a web-based guided self-help intervention for prevention of major depression in adults with subthreshold depression: a randomized clinical trial. *Jama* 2016;315(17):1854-63.
31. Smalley SL, Winston D. Fully present: The science, art, and practice of mindfulness: Da Capo Lifelong Books 2010.
32. Deng Y-Q, Liu X-H, Rodriguez MA, et al. The five facet mindfulness questionnaire: psychometric properties of the Chinese version. *Mindfulness* 2011;2(2):123-28.
33. de Bruin EI, Topper M, Muskens JG, et al. Psychometric properties of the Five Facets Mindfulness Questionnaire (FFMQ) in a meditating and a non-meditating sample. *Assessment* 2012;19(2):187-97.
34. Baer RA, Smith GT, Hopkins J, et al. Using self-report assessment methods to explore facets of mindfulness. *Assessment* 2006;13(1):27-45.
35. Gu J, Strauss C, Crane C, et al. Examining the factor structure of the 39-item and 15-item versions of the Five Facet Mindfulness Questionnaire before and after mindfulness-based cognitive therapy for people with recurrent depression. *Psychological assessment* 2016;28(7):791.
36. Yang N, Waddington G, Adams R, et al. Translation, cultural adaptation, and test-retest reliability of Chinese versions of the Edinburgh Handedness Inventory and Waterloo Footedness Questionnaire. *Laterality: Asymmetries of Body, Brain and Cognition* 2018;23(3):255-73.

- 1  
2  
3 618 37. Oldfield RC. The assessment and analysis of handedness: the Edinburgh inventory. *Neuropsychologia*  
4 619 1971;9(1):97-113.  
5 620 38. Montori VM, Guyatt GH. Intention-to-treat principle. *Cmaj* 2001;165(10):1339-41.  
6 621 39. Fitzpatrick T, Zhou K, Cheng Y, et al. A crowdsourced intervention to promote hepatitis B and C  
7 622 testing among men who have sex with men in China: study protocol for a nationwide online  
8 623 randomized controlled trial. *BMC infectious diseases* 2018;18(1):489.  
9 624 40. Wong SY, Chan JY, Zhang D, et al. The safety of mindfulness-based interventions: a systematic review  
10 625 of randomized controlled trials. *Mindfulness* 2018;9(5):1344-57.  
11 626 41. Piet J, Hougaard E. The effect of mindfulness-based cognitive therapy for prevention of relapse in  
12 627 recurrent major depressive disorder: a systematic review and meta-analysis. *Clinical psychology*  
13 628 *review* 2011;31(6):1032-40.  
14 629 42. Kim JY, Wineinger NE, Steinhubl SR. The influence of wireless self-monitoring program on the  
15 630 relationship between patient activation and health behaviors, medication adherence, and blood  
16 631 pressure levels in hypertensive patients: a substudy of a randomized controlled trial. *Journal of*  
17 632 *medical Internet research* 2016;18(6):e116.  
18 633 43. Kral TR, Schuyler BS, Mumford JA, et al. Impact of short-and long-term mindfulness meditation  
19 634 training on amygdala reactivity to emotional stimuli. *Neuroimage* 2018;181:301-13.  
20  
21  
22  
23 635  
24  
25  
26  
27  
28  
29  
30  
31  
32  
33  
34  
35  
36  
37  
38  
39  
40  
41  
42  
43  
44  
45  
46  
47  
48  
49  
50  
51  
52  
53  
54  
55  
56  
57  
58  
59  
60

1  
2  
3  
4  
5  
6  
7  
8  
9  
10  
11  
12  
13  
14  
15  
16  
17  
18  
19  
20  
21  
22  
23  
24  
25  
26  
27  
28  
29  
30  
31  
32  
33  
34  
35  
36  
37  
38  
39  
40  
41  
42  
43  
44  
45  
46  
47  
48  
49  
50  
51  
52  
53  
54  
55  
56  
57  
58  
59  
60

636 **Figure Legend**

637

638 **Figure 1** Study Flow Diagram

639

640

641

642

643 **Note:** Participants from the “control” intervention will receive “STOP touching your face”  
644 intervention (both text and audio description) immediately after completing the second self-  
645 monitoring face-touching behavior. But they will not be required to practice it or to practice it  
646 at least 15 minutes.

For peer review only

1  
2  
3 **648 Table1** study inclusion and exclusion criteria

---

4 Inclusion Criteria:

- 5  
6 1. 18 years of age or older  
7 2. Being able to access online services  
8 3. Being able to read and write in Chinese  
9 4. Expressing an interest in participant this study  
10 5. Willing to provide informed consent to participate in the study

11 Exclusion Criteria:

- 12  
13 1. Under 18 years of age  
14 2. Unable to access online services  
15 3. Unable to read and write in Chinese  
16 4. Already received “not to touch your face” training
- 

17  
18 **649**



Figure 1

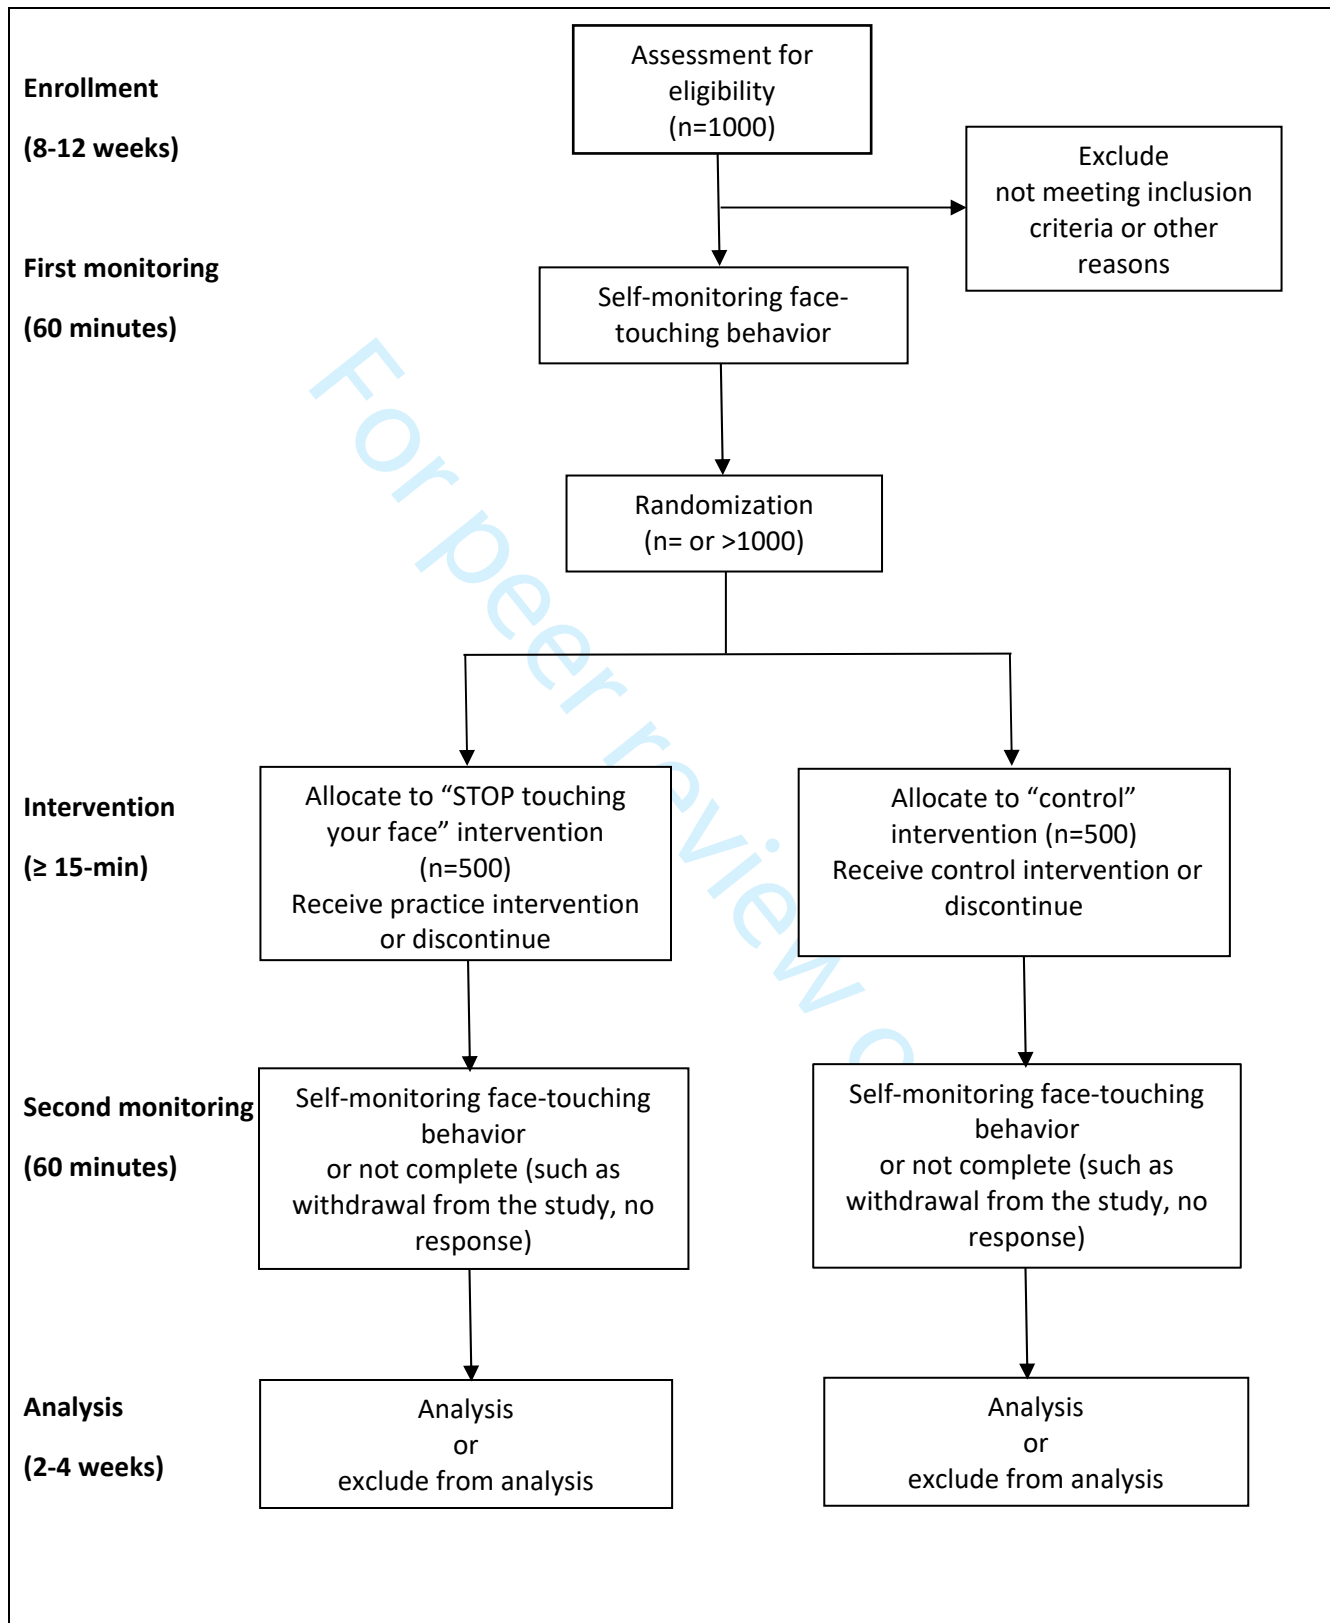

### Informed consent

**Program name:** A brief mindfulness-based intervention of “STOP (Stop, Take a Breath, Observe, Proceed) touching your face”: a randomized controlled trial

**Informed Consent Version Number:** 1.0, Date: March 23, 2020

**Primary Investigator:** Liao, Yanhui

#### 1. Invitation to participate in this research:

You will be invited to participate in a clinical study. This informed consent form provides you with some information to help you decide whether to participate in this clinical study or not. Please read it carefully. If you have any questions, please ask the researcher who is in charge of the study. Your participation in this study is totally voluntary. This study has been reviewed and approved by The Ethics Committee of Sir Run Run Shaw hospital, an affiliate of Zhejiang University, Medical College (NO. 20200401-32).

#### 2. What kind of research is this?

**Research purpose:** Behaviour changes are very important for disease prevention, such as changing smoking behaviour to non-smoking behaviour, and using a pen tip to touch elevator buttons during the new coronavirus epidemic. However, many people touch their faces unconsciously. Avoiding this behaviour is an important way to prevent new coronavirus infections, especially for people in areas where there is a lack of masks (masks can also help people reduce touching their mouth and nose). The STOP technique of mindfulness intervention was originally a simple and effective way to relieve stress and anxiety. By practicing the simple technique of STOP, it may help us avoid touching our faces.

The main purpose of this study is to evaluate an online mindfulness-based brief intervention skill named “STOP (Stop, Take a Breath, Observe, Proceed) touching your face” in reducing face-touching behaviour.

**Research process and duration:** The research process lasts at least more than 2 hours.

**Research method and content:** This randomized controlled trial (RCT) will enroll 1,000 healthy volunteers, and randomly assign subjects to a brief mindfulness intervention or control group at a ratio of 1:1. You need to find a convenient time, no need to deliberately change your life and work plan, you still can work and study. Prepare a paper and pen, or a recorder, then observe and record the number of times you touch your hair, forehead, eyes, nose, mouth, ears, cheeks, chin, and neck within 1 hour, and the time (seconds) of each touch. The intervention group will receive mindfulness-based STOP technology, and observe and record face touching again after practice it. The control group received control information of reminding them to observe and record face touching again. As part of the research, your interview information will be stored in Sir Run Run Shaw hospital of Zhejiang University School of Medicine for analysis or shared with other qualified researchers for research purposes. During the research process, we will use a unified standardized code to encode your private personal information, etc., and we will protect your information in accordance with relevant laws and regulations. If you are assigned to the control group, we will send you the STOP technique that received by the intervention group for free after the study.

**Funding sources and possible conflicts of interest for the trial:** The research plan was

designed by Dr, Yanhui Liao from Department of Psychiatry, Sir Run Run Shaw Hospital, School of Medicine, Zhejiang University, supported by Zhejiang University special scientific research fund for COVID-19 prevention and control (2020XGZX046).

**Alternative therapies outside of this trial:** Participation in this research is completely voluntary. You can refuse to participate in the research or opt out of the research at any time during the research process without any reason. This decision will not affect you in any way. If you decide to withdraw from this study, please notify your investigator in advance.

### **3. What does the participant need to do?**

In the process of participating, you need to cooperate with a brief mindfulness intervention training, and give feedback on touching your face as required.

### **4. What risks and discomforts will it bring?**

This study is a brief behavioural intervention, generally without adverse reactions; in terms of privacy protection, your personal information may be identified due to information leakage during information storage and sharing. The probability of the above risks is extremely small.

In addition to the existing risks, unknown risks may also occur during the research process.

### **5. What are the benefits?**

You will not receive any compensation for participating in this study. Participating in this study can participate in brief mindfulness training, which may reduce the probability of unconsciously touching your face, which can reduce the chance of infection of infectious diseases such as the new coronavirus.

### **6. Do I need to pay related fees?**

To participate in this research project, you do not need to pay related fees.

### **7. Compensation for participating in research, including compensation for injury.**

Participating in this research will not receive financial compensation.

### **8. Who will see my information?**

If you decide to participate in this study, your participation in the trial and your personal information in the trial are confidential. Your behaviour monitoring records and other information will be identified by the research number instead of your name. Information that can identify you will not be disclosed to members other than the research team unless with your permission. All research members and research sponsors are required to keep your identity confidential. Your files will be kept in a locked filing cabinet, which is only accessible to researchers. To ensure that the research is conducted in accordance with the regulations, when necessary, members of the government management department or the ethics review committee can access your personal data in the research unit according to the regulations. When the results of this research are published, no

1  
2  
3 personal information about you will be disclosed.  
4

5  
6 **9. What if an adverse event occurs?**

7 If you are harmed by participating in this study: In the event of damages related to this  
8 clinical study, our medical team will help you to get timely treatment, and adverse events  
9 will be handled as routine medical events in the hospital. You can choose not to participate  
10 in this research, or notify the researcher to withdraw from the research at any time, your  
11 data will not be included in the research results, and any of your medical treatment and  
12 rights will not be affected. If you need other treatments, or if you do not follow the study  
13 plan, or have a study-related injury or for any other reason, the study physician can  
14 terminate your continued participation in this study.  
15

16  
17  
18 **10. How to contact the researcher?**

19 You can keep abreast of the information and research progress related to this research. If  
20 you have any questions related to this research, or if you have any discomfort or injury  
21 during the research, or have questions about the rights of participants in this research You  
22 can contact the researchers at any time (18890098852), 11th Floor, Inpatient Department,  
23 Sir Run Run Shaw Hospital, Zhejiang University School of Medicine, No. 368, Xiasha Road,  
24 Economic and Technological Development Zone, Hangzhou, Zhejiang). If you have any  
25 questions about your rights as a patient participating in the study, please contact The  
26 Medical Ethics Committee of Sir Run Run Shaw Hospital, Zhejiang University School of  
27 Medicine, 0571-86006811.  
28  
29

**Informed consent Signed page**

- I have read this informed consent form.
- I have the opportunity to ask questions and all questions have been answered.
- I understand that participation in this study is voluntary.
- I can choose not to participate in this research, or I will withdraw after notifying the researcher at any time without being discriminated against or retaliated. Any of my medical treatment and rights will not be affected.
- If I need other treatment, or if I do not follow the research plan, or there is a research-related injury or for any other reason, the research physician can terminate my continued participation in this research.

Subject's electronic signature: \_\_\_\_\_

Date: \_\_\_\_\_ year \_\_\_\_\_ month \_\_\_\_\_ day



STANDARD PROTOCOL ITEMS: RECOMMENDATIONS FOR INTERVENTIONAL TRIALS

SPIRIT 2013 Checklist: Recommended items to address in a clinical trial protocol and related documents\*

| Section/item                                           | Item No | Description                                                                                                                                                                                                                                                                              |
|--------------------------------------------------------|---------|------------------------------------------------------------------------------------------------------------------------------------------------------------------------------------------------------------------------------------------------------------------------------------------|
| <b>Administrative information</b>                      |         |                                                                                                                                                                                                                                                                                          |
| P1,1-3 Title                                           | 1       | Descriptive title identifying the study design, population, interventions, and, if applicable, trial acronym                                                                                                                                                                             |
| P4, 54 Trial registration                              | 2a      | Trial identifier and registry name. If not yet registered, name of intended registry                                                                                                                                                                                                     |
|                                                        | 2b      | All items from the World Health Organization Trial Registration Data Set                                                                                                                                                                                                                 |
| Not applicable, Protocol version                       | 3       | Date and version identifier                                                                                                                                                                                                                                                              |
| P25,512-517 Funding                                    | 4       | Sources and types of financial, material, and other support                                                                                                                                                                                                                              |
| P1-2, 5-31; P24-25, 502-510 Roles and responsibilities | 5a      | Names, affiliations, and roles of protocol contributors                                                                                                                                                                                                                                  |
|                                                        | 5b      | Name and contact information for the trial sponsor                                                                                                                                                                                                                                       |
|                                                        | 5c      | Role of study sponsor and funders, if any, in study design; collection, management, analysis, and interpretation of data; writing of the report; and the decision to submit the report for publication, including whether they will have ultimate authority over any of these activities |
|                                                        | 5d      | Composition, roles, and responsibilities of the coordinating centre, steering committee, endpoint adjudication committee, data management team, and other individuals or groups overseeing the trial, if applicable (see Item 21a for data monitoring committee)                         |
| <b>Introduction</b>                                    |         |                                                                                                                                                                                                                                                                                          |
| P5-7, 69-117 Background and rationale                  | 6a      | Description of research question and justification for undertaking the trial, including summary of relevant studies (published and unpublished) examining benefits and harms for each intervention                                                                                       |
|                                                        | 6b      | Explanation for choice of comparators                                                                                                                                                                                                                                                    |
| P7 119-133 Objectives                                  | 7       | Specific objectives or hypotheses                                                                                                                                                                                                                                                        |

1  
2 P8, 140-154 Trial 8 Description of trial design including type of trial (eg, parallel group,  
3 design crossover, factorial, single group), allocation ratio, and framework (eg,  
4 superiority, equivalence, noninferiority, exploratory)  
5  
6  
7

8 **Methods: Participants, interventions, and outcomes**  
9

10 P8, 141 Study 9 Description of study settings (eg, community clinic, academic hospital)  
11 setting and list of countries where data will be collected. Reference to where  
12 list of study sites can be obtained  
13

14 P8,154-155, P30, 10 Inclusion and exclusion criteria for participants. If applicable, eligibility  
15 647-648 Eligibility criteria for study centres and individuals who will perform the  
16 criteria interventions (eg, surgeons, psychotherapists)  
17  
18

19 P14-15, 284-289 11a Interventions for each group with sufficient detail to allow replication,  
20 Interventions including how and when they will be administered  
21

22 11b Criteria for discontinuing or modifying allocated interventions for a  
23 given trial participant (eg, drug dose change in response to harms,  
24 participant request, or improving/worsening disease)  
25

26 11c Strategies to improve adherence to intervention protocols, and any  
27 procedures for monitoring adherence (eg, drug tablet return,  
28 laboratory tests)  
29  
30

31 11d Relevant concomitant care and interventions that are permitted or  
32 prohibited during the trial  
33

34 P16, 326-338 12 Primary, secondary, and other outcomes, including the specific  
35 Outcomes measurement variable (eg, systolic blood pressure), analysis metric  
36 (eg, change from baseline, final value, time to event), method of  
37 aggregation (eg, median, proportion), and time point for each  
38 outcome. Explanation of the clinical relevance of chosen efficacy and  
39 harm outcomes is strongly recommended  
40  
41

42 P22, 446-448 13 Time schedule of enrolment, interventions (including any run-ins and  
43 Participant washouts), assessments, and visits for participants. A schematic  
44 timeline diagram is highly recommended (see Figure)  
45  
46

47 P9, 157-176 14 Estimated number of participants needed to achieve study objectives  
48 Sample size and how it was determined, including clinical and statistical  
49 assumptions supporting any sample size calculations  
50

51 P10, 178-188 15 Strategies for achieving adequate participant enrolment to reach  
52 Recruitment target sample size  
53  
54

55 **Methods: Assignment of interventions (for controlled trials)**  
56

57 Allocation:  
58  
59  
60

|    |                |     |                                                                         |
|----|----------------|-----|-------------------------------------------------------------------------|
| 1  |                |     |                                                                         |
| 2  | P11, 204-208   | 16a | Method of generating the allocation sequence (eg, computer-             |
| 3  | Sequence       |     | generated random numbers), and list of any factors for stratification.  |
| 4  | generation     |     | To reduce predictability of a random sequence, details of any planned   |
| 5  |                |     | restriction (eg, blocking) should be provided in a separate document    |
| 6  |                |     | that is unavailable to those who enrol participants or assign           |
| 7  |                |     | interventions                                                           |
| 8  |                |     |                                                                         |
| 9  |                |     |                                                                         |
| 10 | P11, 208-209   | 16b | Mechanism of implementing the allocation sequence (eg, central          |
| 11 | Allocation     |     | telephone; sequentially numbered, opaque, sealed envelopes),            |
| 12 | concealment    |     | describing any steps to conceal the sequence until interventions are    |
| 13 | mechanism      |     | assigned                                                                |
| 14 |                |     |                                                                         |
| 15 | P11, 201-208   | 16c | Who will generate the allocation sequence, who will enrol participants, |
| 16 | Implementation |     | and who will assign participants to interventions                       |
| 17 |                |     |                                                                         |
| 18 |                |     |                                                                         |
| 19 | P11, 209-211   | 17a | Who will be blinded after assignment to interventions (eg, trial        |
| 20 | Blinding       |     | participants, care providers, outcome assessors, data analysts), and    |
| 21 | (masking)      |     | how                                                                     |
| 22 |                |     |                                                                         |
| 23 |                | 17b | If blinded, circumstances under which unblinding is permissible, and    |
| 24 |                |     | procedure for revealing a participant's allocated intervention during   |
| 25 |                |     | the trial                                                               |
| 26 |                |     |                                                                         |
| 27 |                |     |                                                                         |

### Methods: Data collection, management, and analysis

|    |                 |     |                                                                          |
|----|-----------------|-----|--------------------------------------------------------------------------|
| 28 |                 |     |                                                                          |
| 29 |                 |     |                                                                          |
| 30 | P19, 386-389    | 18a | Plans for assessment and collection of outcome, baseline, and other      |
| 31 | Data collection |     | trial data, including any related processes to promote data quality (eg, |
| 32 | methods         |     | duplicate measurements, training of assessors) and a description of      |
| 33 |                 |     | study instruments (eg, questionnaires, laboratory tests) along with      |
| 34 |                 |     | their reliability and validity, if known. Reference to where data        |
| 35 |                 |     | collection forms can be found, if not in the protocol                    |
| 36 |                 |     |                                                                          |
| 37 |                 |     |                                                                          |
| 38 |                 | 18b | Plans to promote participant retention and complete follow-up,           |
| 39 |                 |     | including list of any outcome data to be collected for participants who  |
| 40 |                 |     | discontinue or deviate from intervention protocols                       |
| 41 |                 |     |                                                                          |
| 42 | P19, 388-389    | 19  | Plans for data entry, coding, security, and storage, including any       |
| 43 | Data            |     | related processes to promote data quality (eg, double data entry;        |
| 44 | management      |     | range checks for data values). Reference to where details of data        |
| 45 |                 |     | management procedures can be found, if not in the protocol               |
| 46 |                 |     |                                                                          |
| 47 |                 |     |                                                                          |
| 48 | P19-21, 391-420 | 20a | Statistical methods for analysing primary and secondary outcomes.        |
| 49 | Statistical     |     | Reference to where other details of the statistical analysis plan can be |
| 50 | methods         |     | found, if not in the protocol                                            |
| 51 |                 |     |                                                                          |
| 52 |                 | 20b | Methods for any additional analyses (eg, subgroup and adjusted           |
| 53 |                 |     | analyses)                                                                |
| 54 |                 |     |                                                                          |
| 55 |                 | 20c | Definition of analysis population relating to protocol non-adherence     |
| 56 |                 |     | (eg, as randomised analysis), and any statistical methods to handle      |
| 57 |                 |     | missing data (eg, multiple imputation)                                   |
| 58 |                 |     |                                                                          |
| 59 |                 |     |                                                                          |
| 60 |                 |     |                                                                          |



**Methods: Monitoring**

|    |                 |     |                                                                        |
|----|-----------------|-----|------------------------------------------------------------------------|
| 1  |                 |     |                                                                        |
| 2  |                 |     |                                                                        |
| 3  |                 |     |                                                                        |
| 4  | P19, 388-389    | 21a | Composition of data monitoring committee (DMC); summary of its role    |
| 5  | Data monitoring |     | and reporting structure; statement of whether it is independent from   |
| 6  |                 |     | the sponsor and competing interests; and reference to where further    |
| 7  |                 |     | details about its charter can be found, if not in the protocol.        |
| 8  |                 |     | Alternatively, an explanation of why a DMC is not needed               |
| 9  |                 |     |                                                                        |
| 10 |                 | 21b | Description of any interim analyses and stopping guidelines, including |
| 11 |                 |     | who will have access to these interim results and make the final       |
| 12 |                 |     | decision to terminate the trial                                        |
| 13 |                 |     |                                                                        |
| 14 |                 |     |                                                                        |
| 15 | P21, 422-431    | 22  | Plans for collecting, assessing, reporting, and managing solicited and |
| 16 | Harms           |     | spontaneously reported adverse events and other unintended effects     |
| 17 |                 |     | of trial interventions or trial conduct                                |
| 18 |                 |     |                                                                        |
| 19 | Auditing        | 23  | Frequency and procedures for auditing trial conduct, if any, and       |
| 20 |                 |     | whether the process will be independent from investigators and the     |
| 21 |                 |     | sponsor                                                                |
| 22 |                 |     |                                                                        |
| 23 |                 |     |                                                                        |

**Ethics and dissemination**

|    |                   |     |                                                                               |
|----|-------------------|-----|-------------------------------------------------------------------------------|
| 24 |                   |     |                                                                               |
| 25 |                   |     |                                                                               |
| 26 | P21, 434-435      | 24  | Plans for seeking research ethics committee/institutional review board        |
| 27 | Research ethics   |     | (REC/IRB) approval                                                            |
| 28 | approval          |     |                                                                               |
| 29 |                   |     |                                                                               |
| 30 | Protocol          | 25  | Plans for communicating important protocol modifications (eg,                 |
| 31 | amendments        |     | changes to eligibility criteria, outcomes, analyses) to relevant parties      |
| 32 |                   |     | (eg, investigators, REC/IRBs, trial participants, trial registries, journals, |
| 33 |                   |     | regulators)                                                                   |
| 34 |                   |     |                                                                               |
| 35 |                   |     |                                                                               |
| 36 | P21-22, 437-443   | 26a | Who will obtain informed consent or assent from potential trial               |
| 37 | Consent or assent |     | participants or authorised surrogates, and how (see Item 32)                  |
| 38 |                   |     |                                                                               |
| 39 |                   | 26b | Additional consent provisions for collection and use of participant data      |
| 40 |                   |     | and biological specimens in ancillary studies, if applicable                  |
| 41 |                   |     |                                                                               |
| 42 |                   |     |                                                                               |
| 43 | P19, 389          | 27  | How personal information about potential and enrolled participants will       |
| 44 | Confidentiality   |     | be collected, shared, and maintained in order to protect confidentiality      |
| 45 |                   |     | before, during, and after the trial                                           |
| 46 |                   |     |                                                                               |
| 47 | P25, 519-521      | 28  | Financial and other competing interests for principal investigators for       |
| 48 | Declaration of    |     | the overall trial and each study site                                         |
| 49 | interests         |     |                                                                               |
| 50 |                   |     |                                                                               |
| 51 |                   |     |                                                                               |
| 52 | P11, 209-2011     | 29  | Statement of who will have access to the final trial dataset, and             |
| 53 | Access to data    |     | disclosure of contractual agreements that limit such access for               |
| 54 |                   |     | investigators                                                                 |
| 55 |                   |     |                                                                               |
| 56 | P8, 153-154       | 30  | Provisions, if any, for ancillary and post-trial care, and for                |
| 57 | Ancillary and     |     | compensation to those who suffer harm from trial participation                |
| 58 | post-trial care   |     |                                                                               |
| 59 |                   |     |                                                                               |
| 60 |                   |     |                                                                               |

|                                                                   |                                         |                                                   |                                                                                                                                                                                                                                                                                                                                                                                                                                                                                                  |
|-------------------------------------------------------------------|-----------------------------------------|---------------------------------------------------|--------------------------------------------------------------------------------------------------------------------------------------------------------------------------------------------------------------------------------------------------------------------------------------------------------------------------------------------------------------------------------------------------------------------------------------------------------------------------------------------------|
| 1<br>2<br>3<br>4<br>5<br>6<br>7<br>8<br>9<br>10<br>11<br>12<br>13 | P22, 448-450<br>Dissemination<br>policy | 31a<br><br><br><br><br><br><br>31b<br><br><br>31c | Plans for investigators and sponsor to communicate trial results to participants, healthcare professionals, the public, and other relevant groups (eg, via publication, reporting in results databases, or other data sharing arrangements), including any publication restrictions<br><br>Authorship eligibility guidelines and any intended use of professional writers<br><br>Plans, if any, for granting public access to the full protocol, participant-level dataset, and statistical code |
|-------------------------------------------------------------------|-----------------------------------------|---------------------------------------------------|--------------------------------------------------------------------------------------------------------------------------------------------------------------------------------------------------------------------------------------------------------------------------------------------------------------------------------------------------------------------------------------------------------------------------------------------------------------------------------------------------|

## Appendices

|                                                                      |                                                                                                              |                              |                                                                                                                                                                                                                                                                                                              |
|----------------------------------------------------------------------|--------------------------------------------------------------------------------------------------------------|------------------------------|--------------------------------------------------------------------------------------------------------------------------------------------------------------------------------------------------------------------------------------------------------------------------------------------------------------|
| 14<br>15<br>16<br>17<br>18<br>19<br>20<br>21<br>22<br>23<br>24<br>25 | In supplementary<br>file,<br>Informed consent<br>materials<br><br>Not applicable,<br>Biological<br>specimens | 32<br><br><br><br><br><br>33 | Model consent form and other related documentation given to participants and authorised surrogates<br><br><br>Plans for collection, laboratory evaluation, and storage of biological specimens for genetic or molecular analysis in the current trial and for future use in ancillary studies, if applicable |
|----------------------------------------------------------------------|--------------------------------------------------------------------------------------------------------------|------------------------------|--------------------------------------------------------------------------------------------------------------------------------------------------------------------------------------------------------------------------------------------------------------------------------------------------------------|

---

\*It is strongly recommended that this checklist be read in conjunction with the SPIRIT 2013 Explanation & Elaboration for important clarification on the items. Amendments to the protocol should be tracked and dated. The SPIRIT checklist is copyrighted by the SPIRIT Group under the Creative Commons "[Attribution-NonCommercial-NoDerivs 3.0 Unported](https://creativecommons.org/licenses/by-nc-nd/3.0/)" license.
